# Supplementary material
Source: PubMed Central journal article supplement (PMC8123931)

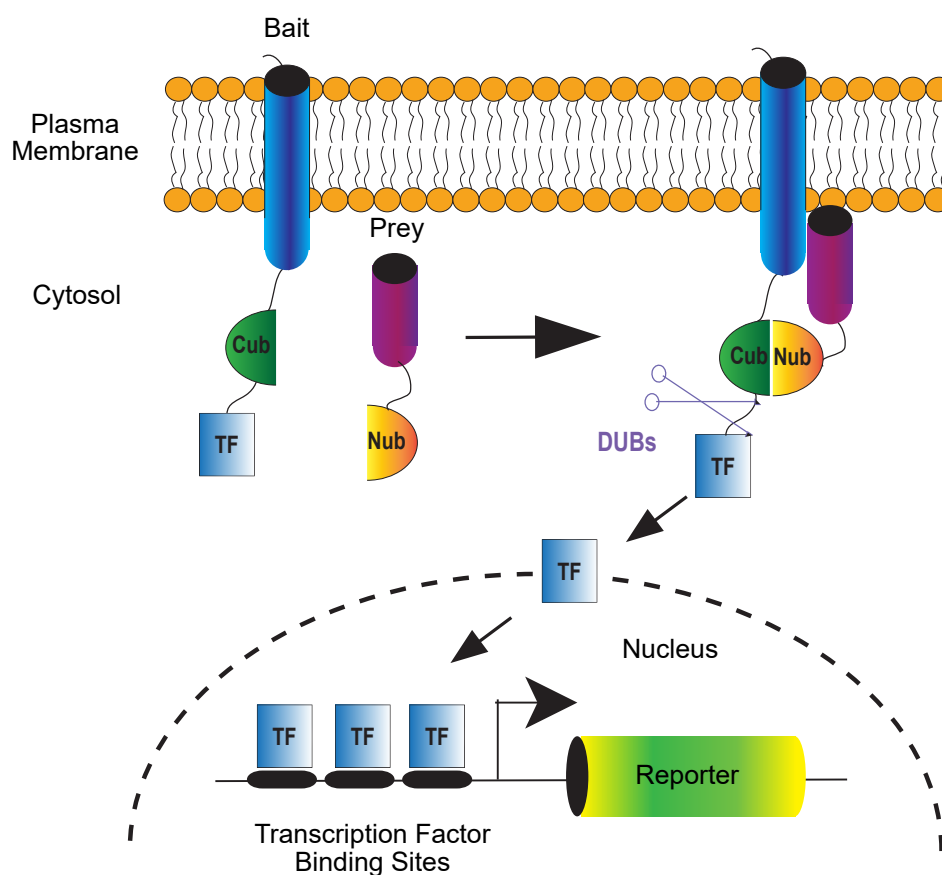

**Supplementary Figure 1.** Principles of MaMTH. Integral membrane 'bait', fused to the C-terminus of ubiquitin (Cub) and an artificial transcription factor (TF), is expressed alongside cytosolic or membrane-bound 'prey' fused to the N-terminus of ubiquitin (Nub) in cells carrying a luciferase reporter. Interaction of bait and prey leads to ubiquitin reconstitution, proteolytic cleavage by deubiquitinating enzymes (DUBs) and subsequent release of the TF, which then enters the nucleus of the cell and activates the reporter system. In MaMTH-DS, small molecules which disrupt interaction of bait and prey can be identified by loss of luciferase activity.

a

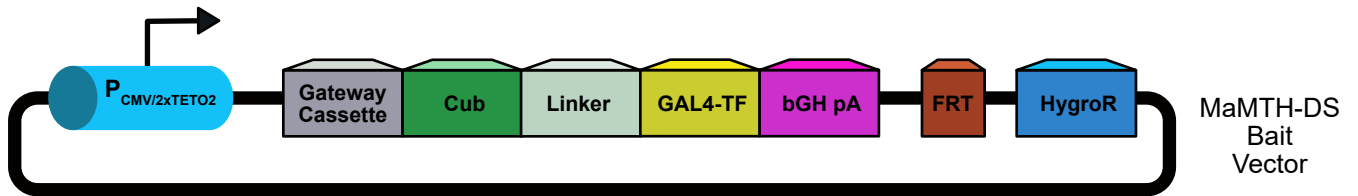

b

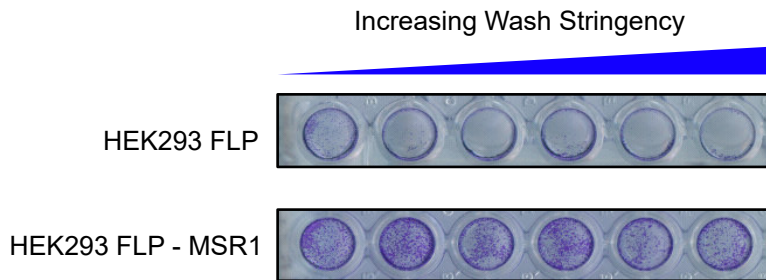

c

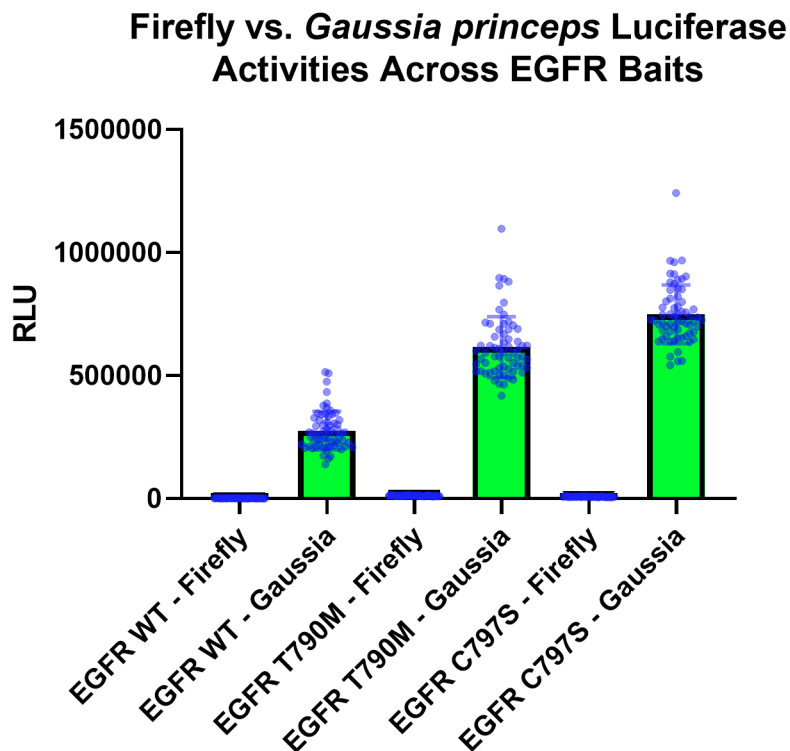

**Supplementary Figure 2.** Overview of key modifications employed in the MaMTH-DS platform. (a) Schematic diagram of Flp-In TReX and Gateway compatible MaMTH-DS bait vector. (b) Methylene blue rinse test demonstrating enhanced adherence of Flp-compatible HEK293 cells carrying randomly integrated macrophage scavenger receptor 1 (MSR1, bottom panel) vs Flp-compatible HEK293 WT (top panel). Experiments were carried out four times with consistent results obtained each time. (c) Comparison of Firefly vs *Gaussia princeps* luciferase activity across EGFR WT and mutants in MaMTH assays performed in a 384-well format. EGFR T790M = EGFR L858R/T790M, EGFR C797S = EGFR L858R/T790M/C797S. Values are the average of 48 or 64 independent measurements (for Firefly and *Gaussia* luciferases, respectively) with error bars showing standard deviation.

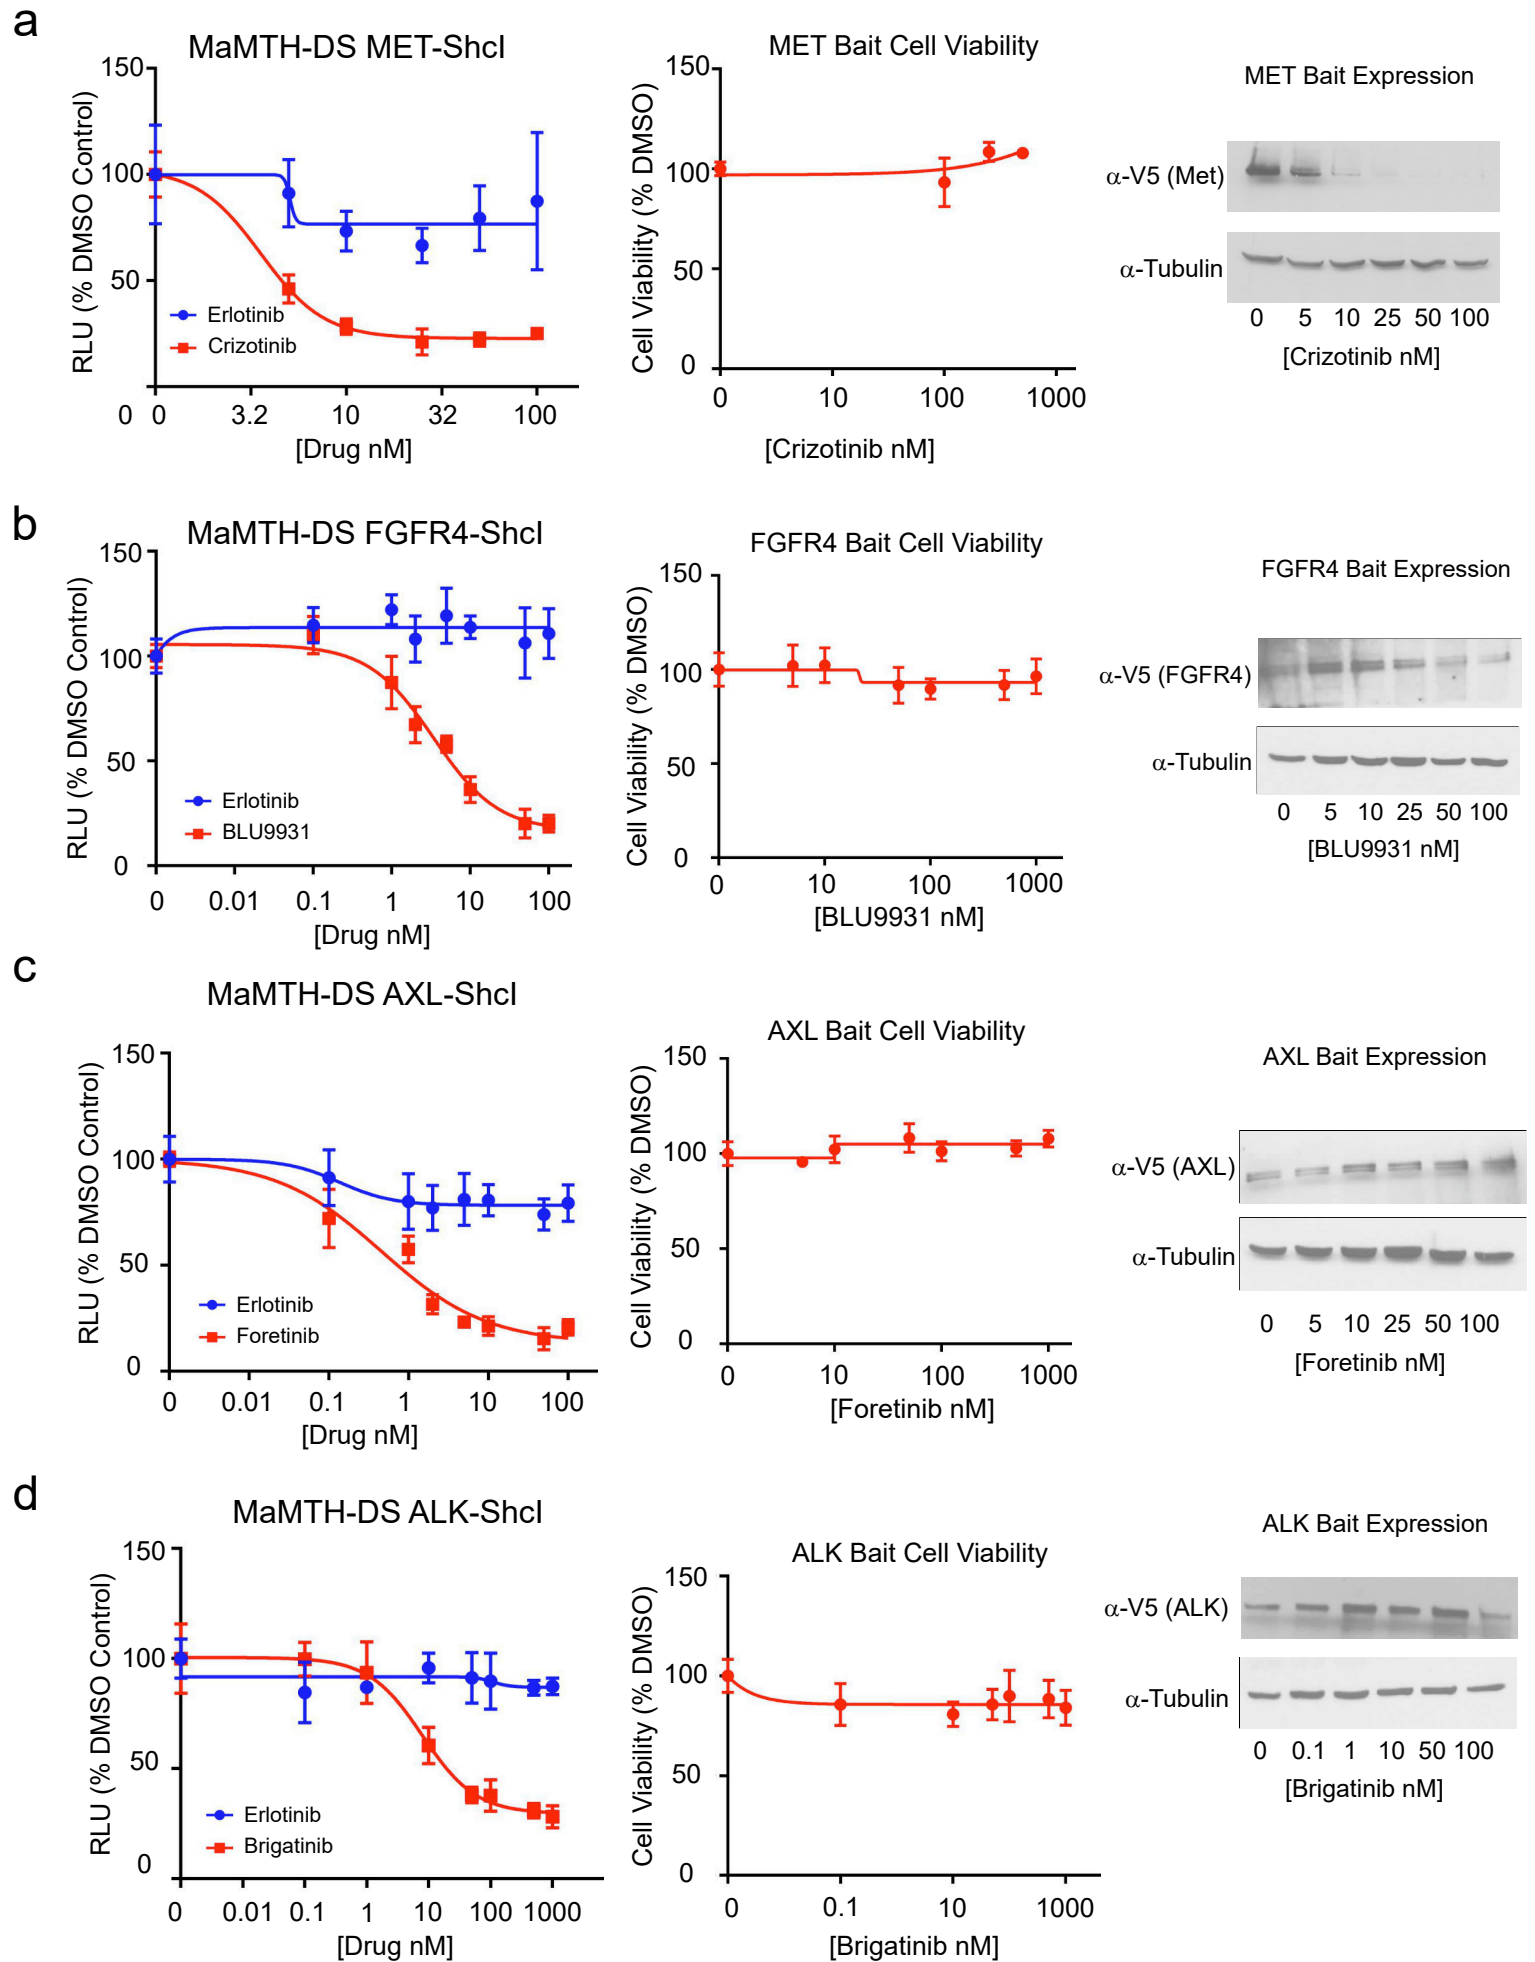

**Supplementary Figure 3.** Effect of TKI therapeutics on MaMTH-DS RTK baits. Left panels show the effect of the indicated compounds on MaMTH-DS activity in reporter cells stably expressing RTK bait in the presence of transiently transfected Shc1 prey. Middle panels show the effects of the indicated compounds on the viability of reporter cells expressing RTK bait. Right panels show the effect of indicated compounds on the expression of RTK bait in reporter cells. (a) MET receptor with Crizotinib. (b) FGFR4 receptor with BLU9931. (c) AXL receptor with Foretinib. (d) ALK receptor with Brigatinib. All plotted values are the average of three independent measurements, with error bars showing standard deviation. See Supplementary Fig 29 for source blot images.

**a**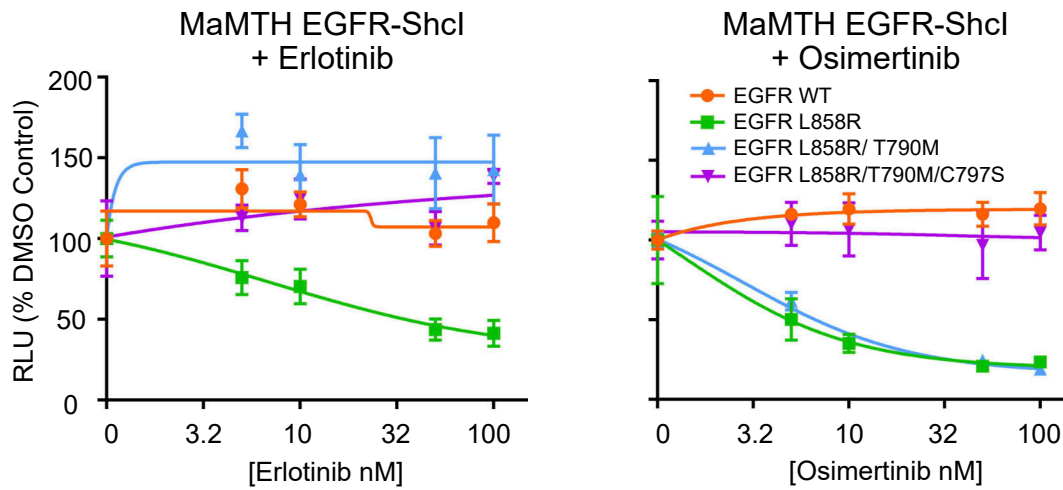**b**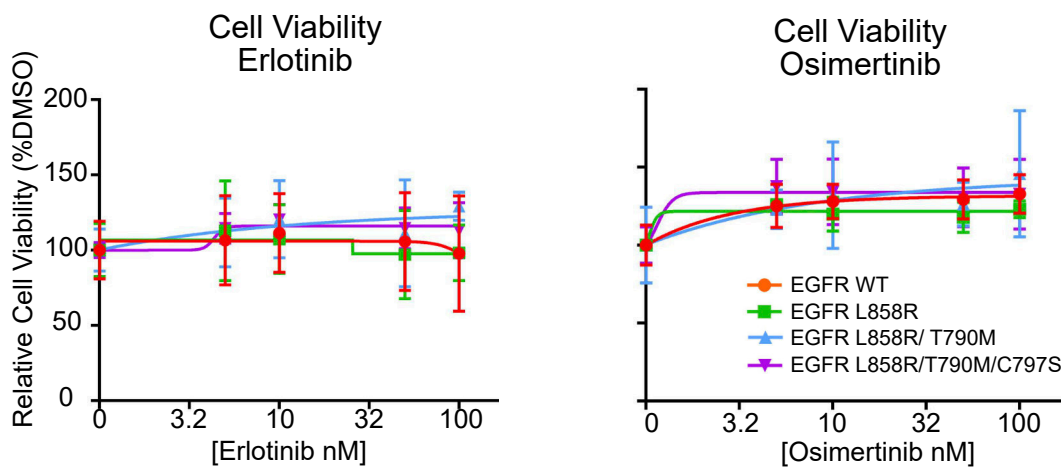**c**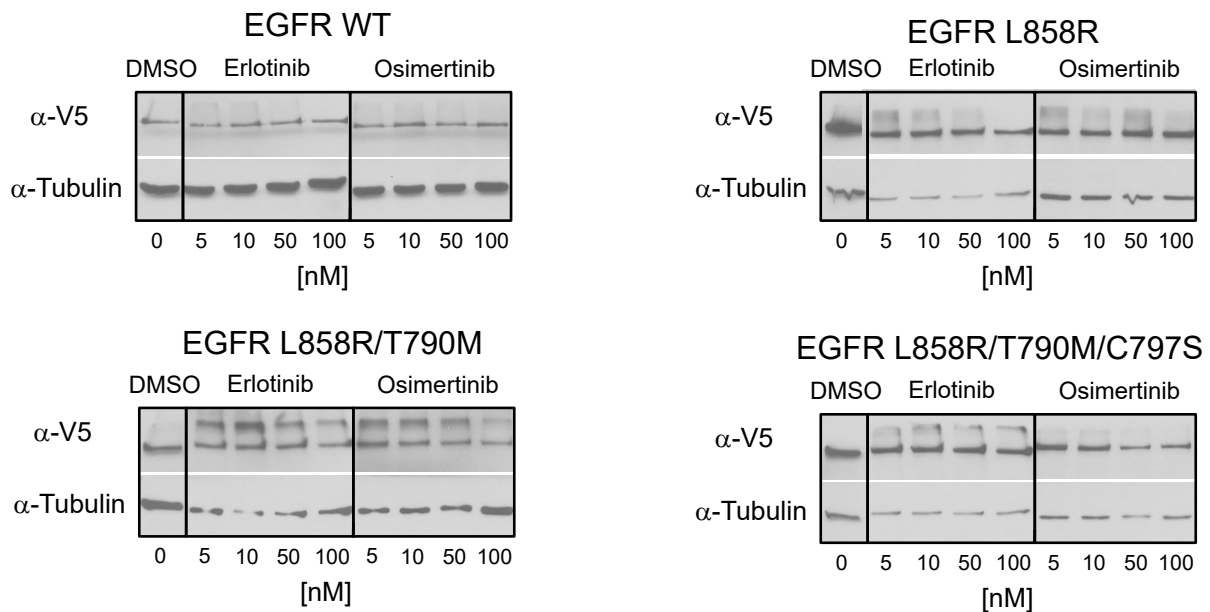

**Supplementary Figure 4.** Effect of TKI therapeutics on MaMTH reporter cells stably expressing EGFR WT and mutant baits. (a) Effect of Erlotinib and Osimertinib on EGFR WT and mutants measured using MaMTH-DS. (b) Effect of reported TKI therapeutics on MaMTH EGFR bait reporter cell viability. (c) Effect of reported TKI therapeutics on EGFR bait expression. Baits were probed with  $\alpha$ -V5 antibody. Tubulin levels were measured as a loading control. For graphs, all plotted values are the average of three independent measurements, with error bars showing standard deviation. For blots, results are representative of at least two independent experiments. See Supplementary Fig 29 for source blot images.

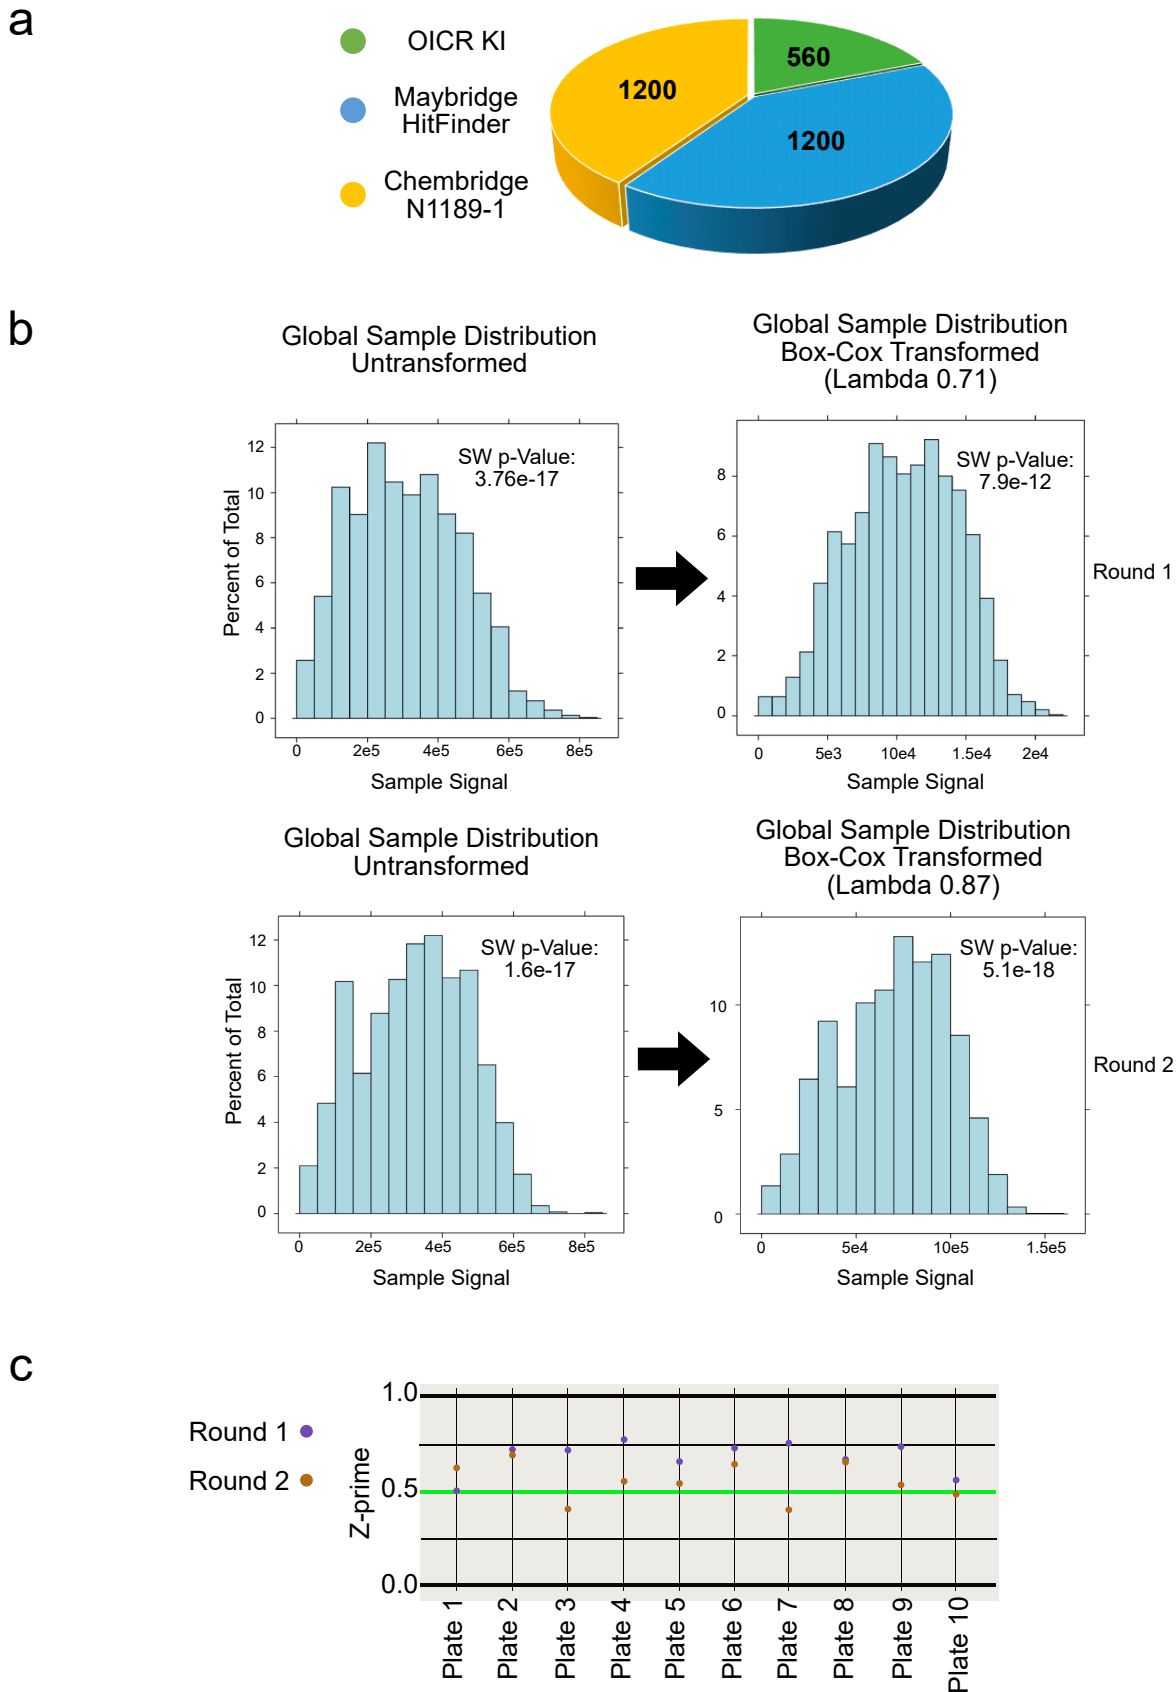

**Supplementary Figure 5.** MaMTH-DS pilot screen compound overview and initial data analysis. (a) Source and number of small molecules used in our pilot screening library. Library included compounds from the Maybridge HitFinder™, Chembridge N1189-1 and Ontario Institute for Cancer Research (OICR) kinase inhibitor collections. (b) Sample distributions ( $n=2960$ ) of untransformed and Box-Cox power transformed data (using a value of Lambda = 0.71 and 0.87 for screening rounds 1 and 2, respectively). P-Values from Shapiro-Wilk's normality test of data are shown in inset. (c) Z' values across all ten plates used in each round of screening.

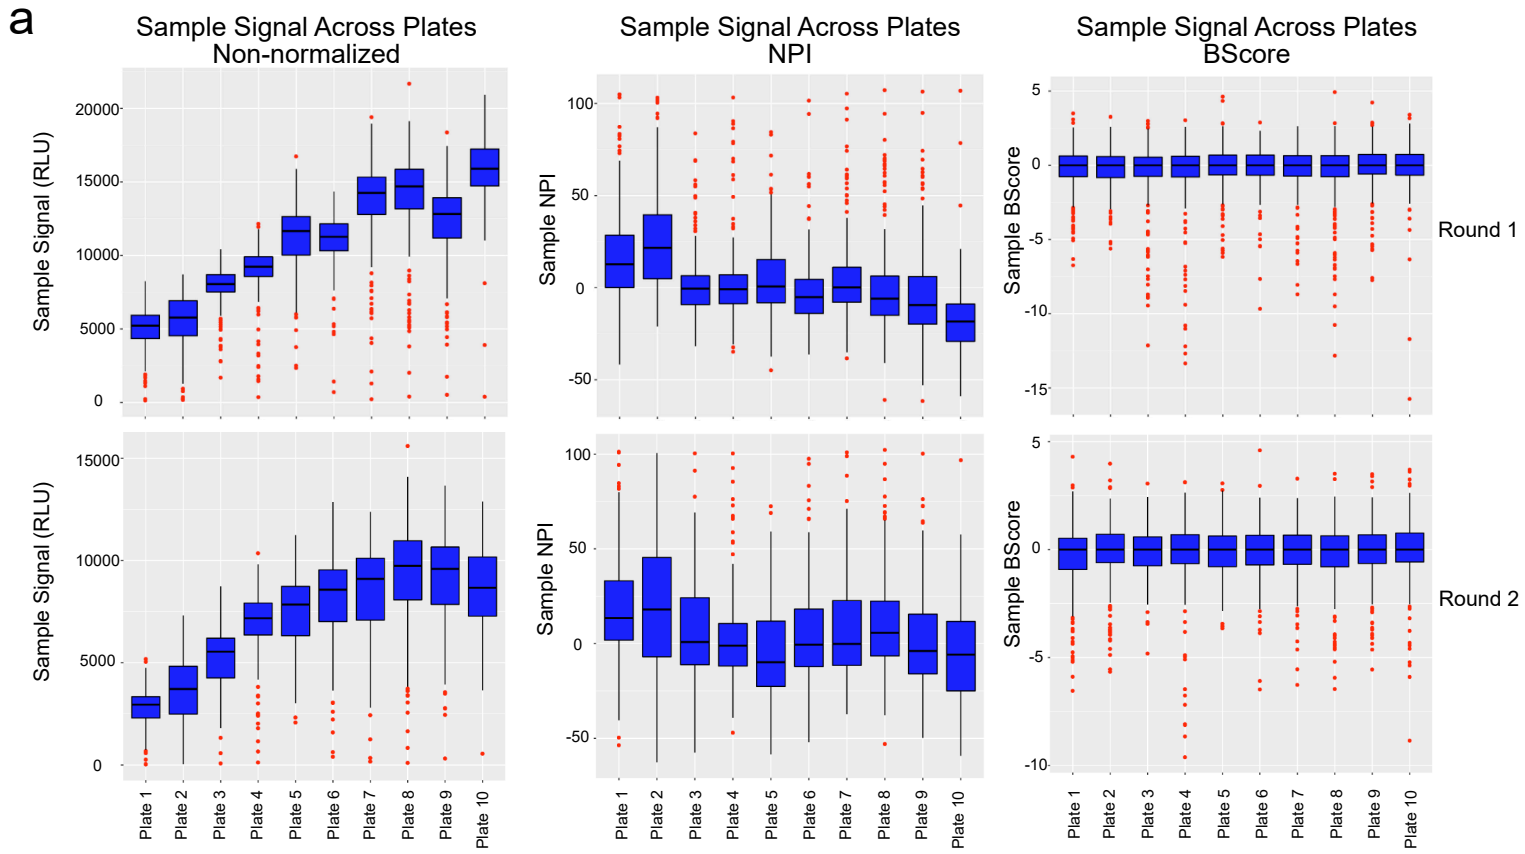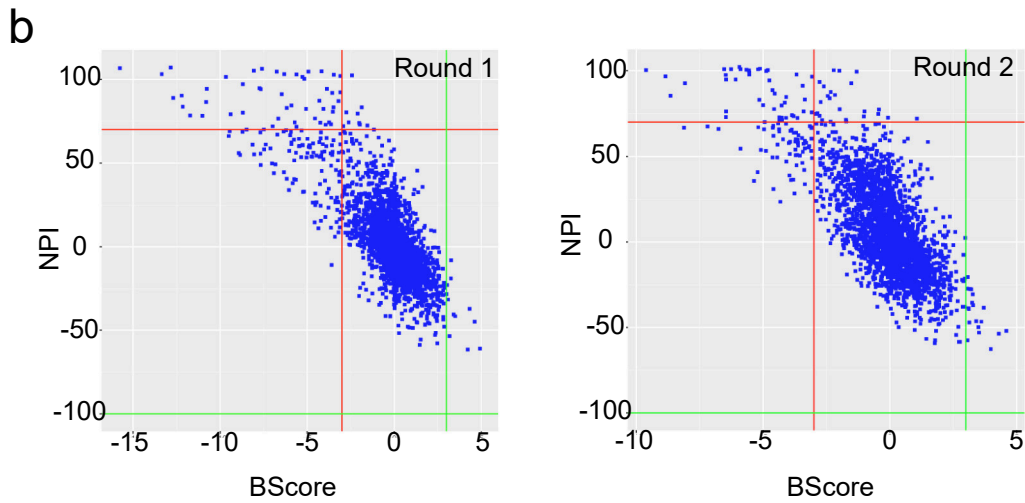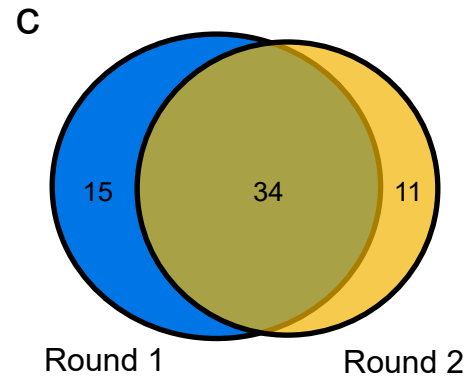

**Supplementary Figure 6.** MaMTH-DS pilot screen data normalization and hit identification. (a) Box and whisker plots showing distribution of sample values across plates for non-normalized, NPI-normalized and BScore-normalized data. Medians are indicated by thick black lines. Filled blue boxes encompass the 25th to 75th percentiles. Whiskers extend to the largest and smallest values not greater than 1.5 times the IQR. Outlying points beyond the whiskers are shown individually in red. (b) Scatterplot of NPI vs. BScore for all samples in screens. Horizontal red and green lines correspond to NPI values of 70% and -100%, respectively. Vertical red and green lines correspond to BScore values of -3 and +3, respectively. All values in the upper left quadrants were scored as hits. (c) Total hits and overlap for screening Rounds 1 and 2.

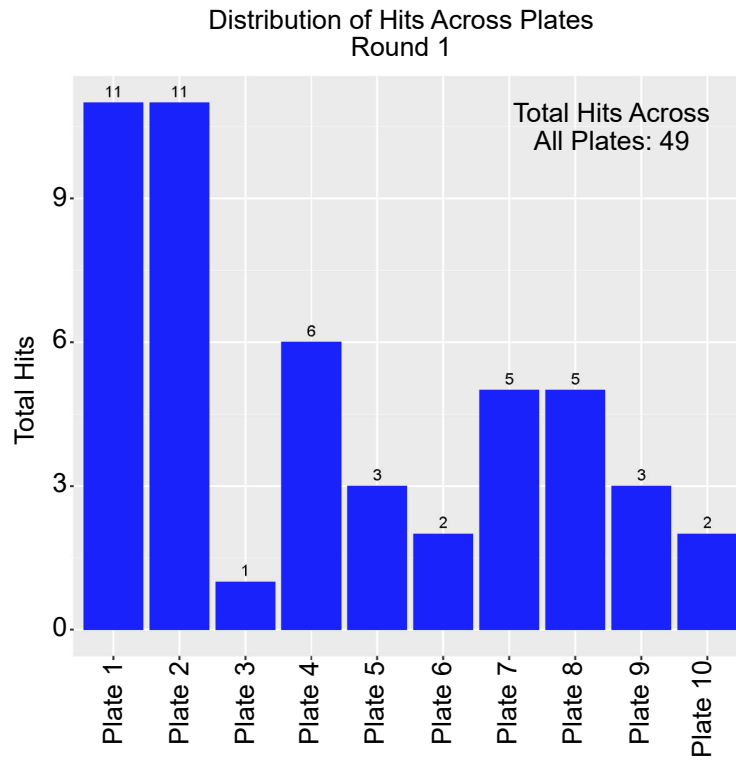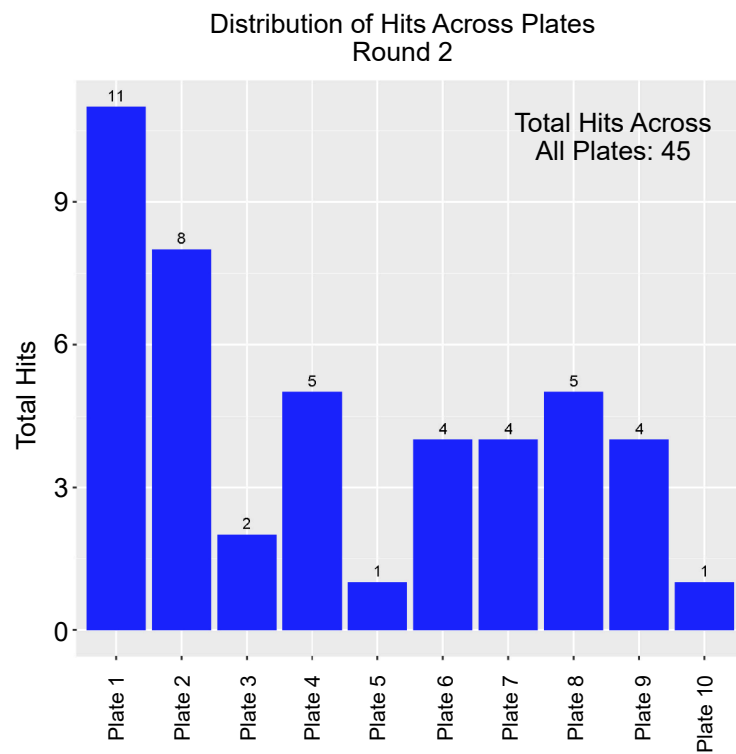

**Supplementary Figure 7.** MaMTH-DS hits from screen of EGFR L858R/T790M/C797S in the presence of Shc1. Hit distributions across plates for Rounds 1 and 2 of screening are shown, with the total number of hits per screen labelled inset. Distribution of hits is relatively even across all plates, with a slightly greater hit rate in the OICR Kinase Inhibitor Collection (Plates 1 and 2), consistent with the expected activity of these compounds towards RTKs such as EGFR.

a

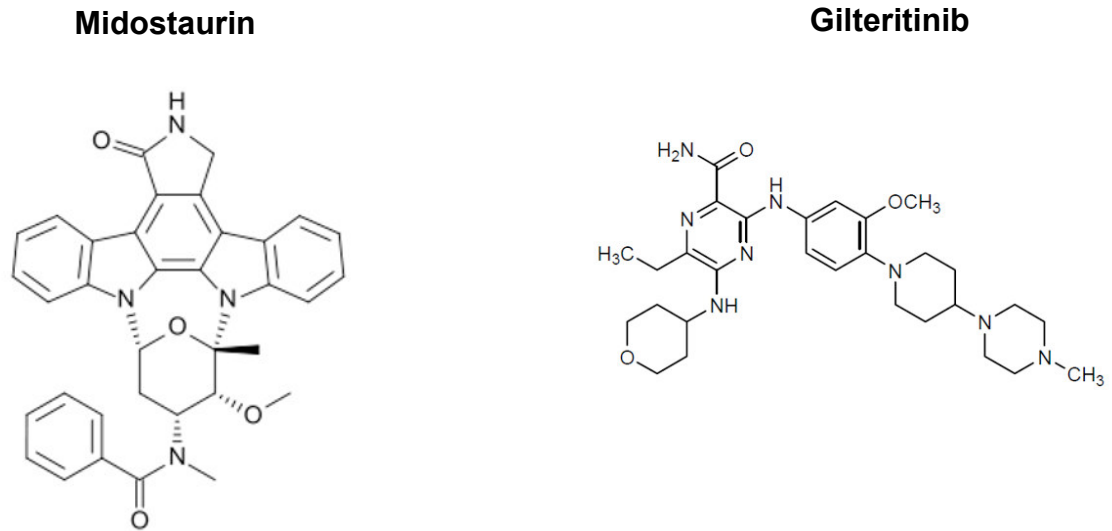

b

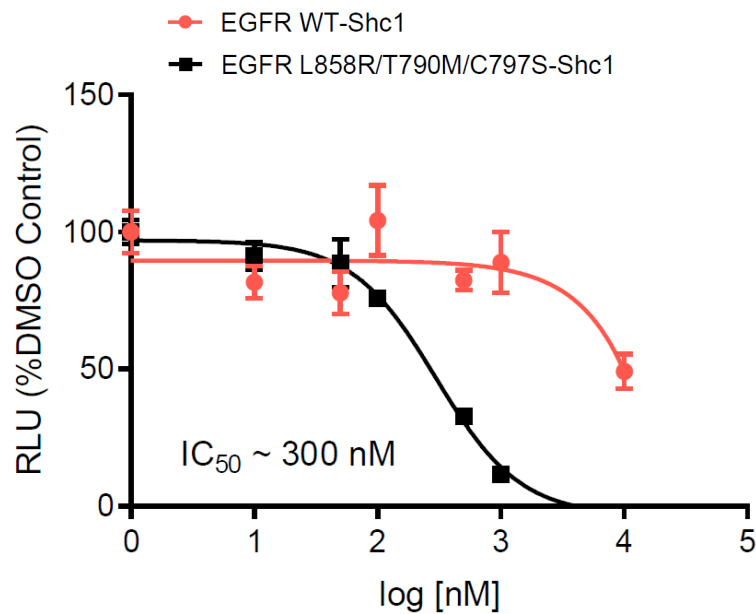

**Supplementary Figure 8.** Comparison of Midostaurin and Gilteritinib structures and analysis of Gilteritinib activity in MaMTH-DS. (a) Chemical structures of Midostaurin and Gilteritinib. (b) MaMTH-DS analysis of Gilteritinib demonstrating that it is a potent, mutant-specific and dose-responsive inhibitor of the interaction of EGFR L858R/T790M/C797S triple mutant with Shc1. Results are shown as the average  $\pm$  SD for three independent experiments.



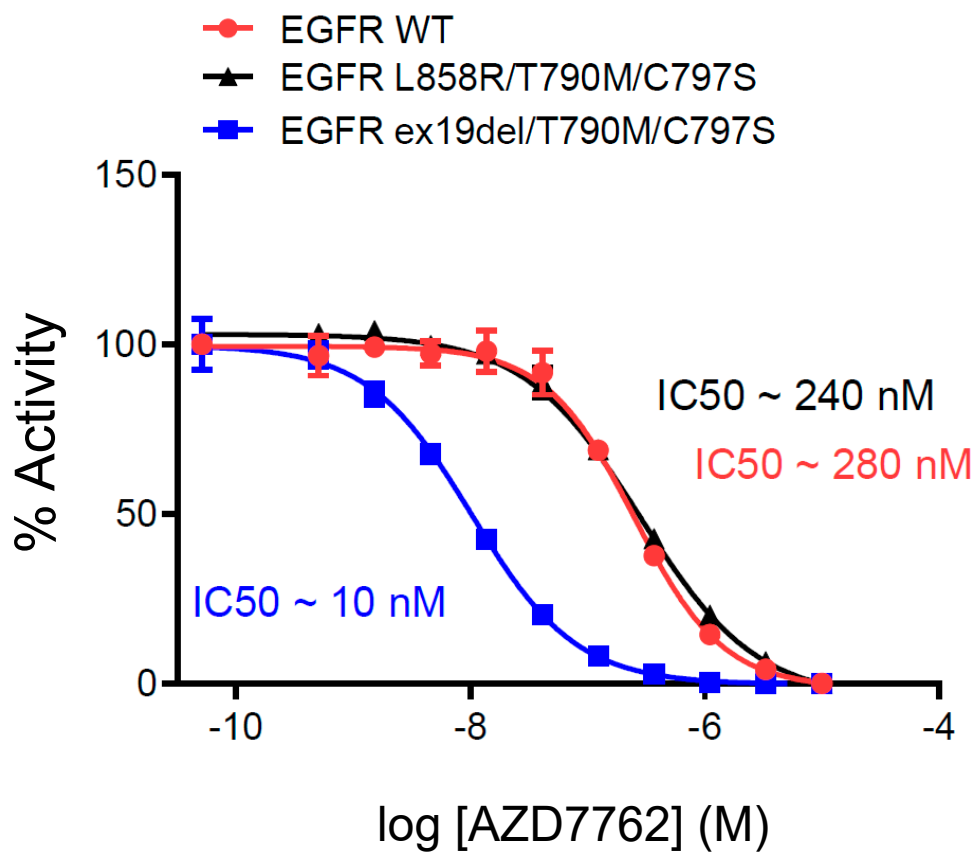

**Supplementary Figure 9.** Inhibition of recombinant EGFR WT and triple mutant kinase domain activity by AZD7762 measured using *in vitro* kinase assay. Results are shown as the average  $\pm$  SD for two independent experiments.

**a**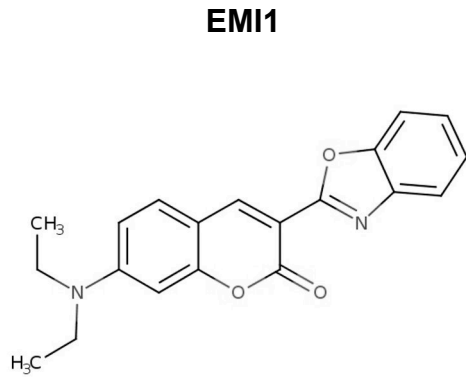**EMI7**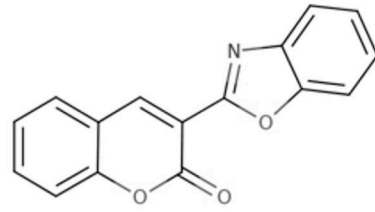**b**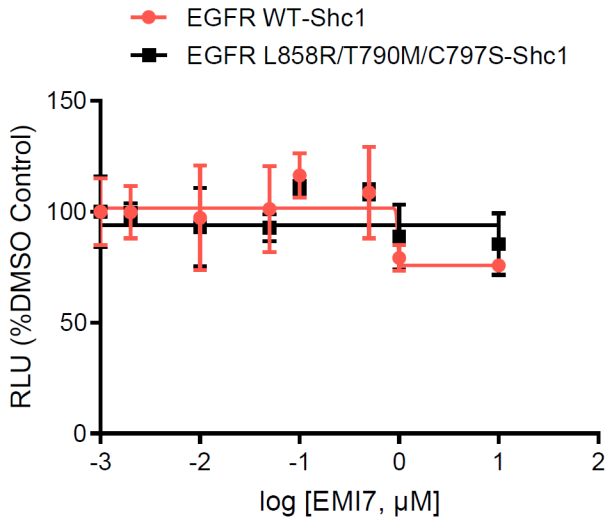**c**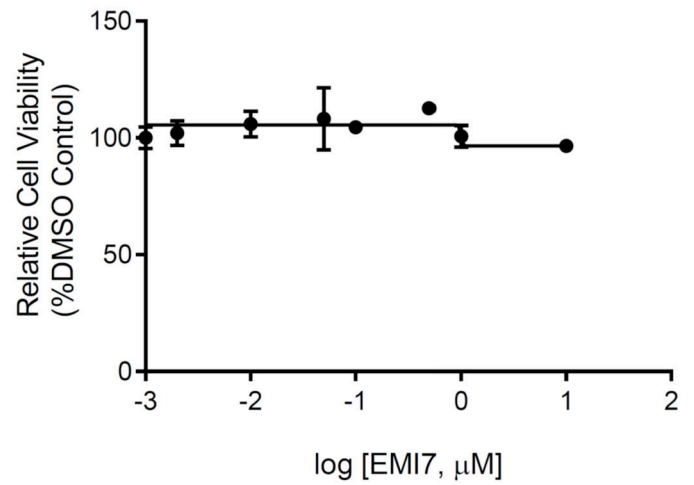**d**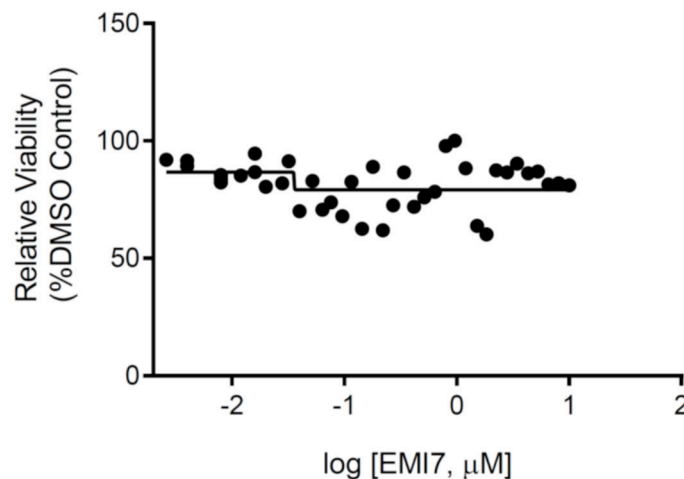

**Supplementary Figure 10.** Characterization of EMI7 control compound. (a) Chemical structures of EMI1 and EMI7 analog. (b) MaMTH-DS analysis of EMI7 demonstrating that it has no effect on the interaction of EGFR L858R/T790M/C797S triple mutant with Shc1. Results are shown as the average  $\pm$  SD for three independent experiments. (c) Cell viability assay showing that EMI7 does not affect the growth of PC9 EGFR ex19del/T790M/C797S triple mutant cells. Results are shown as the average  $\pm$  SD for three independent experiments. (d) Viability assay showing that EMI7 does not affect the growth of PC9 EGFR ex19del/T790M/C797S organoids. Results are shown as single 36-point dose response experiments.

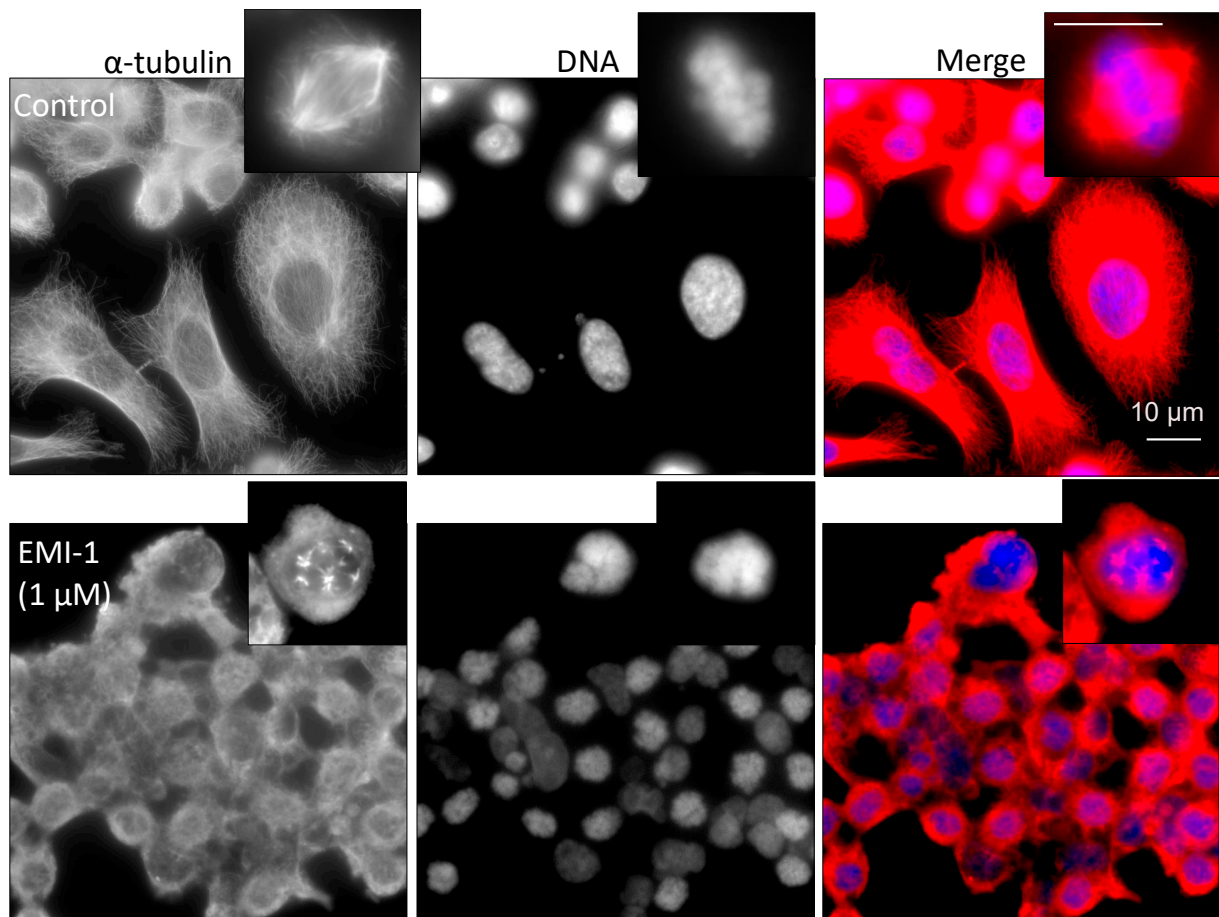

**Supplementary Figure 11.** Assessing the effect of EMI1 on microtubule dynamics in PC9 EGFR ex19del/T790M/C797S cells. EMI1 depolymerized interphase microtubules and perturbed spindle formation (inset). PC9 cells were incubated without (Control, upper panel) or with 1  $\mu$ M EMI1 (lower panel) for 20 hours. Scale bar is 10  $\mu$ m. Results are representative of at least two independent experiments

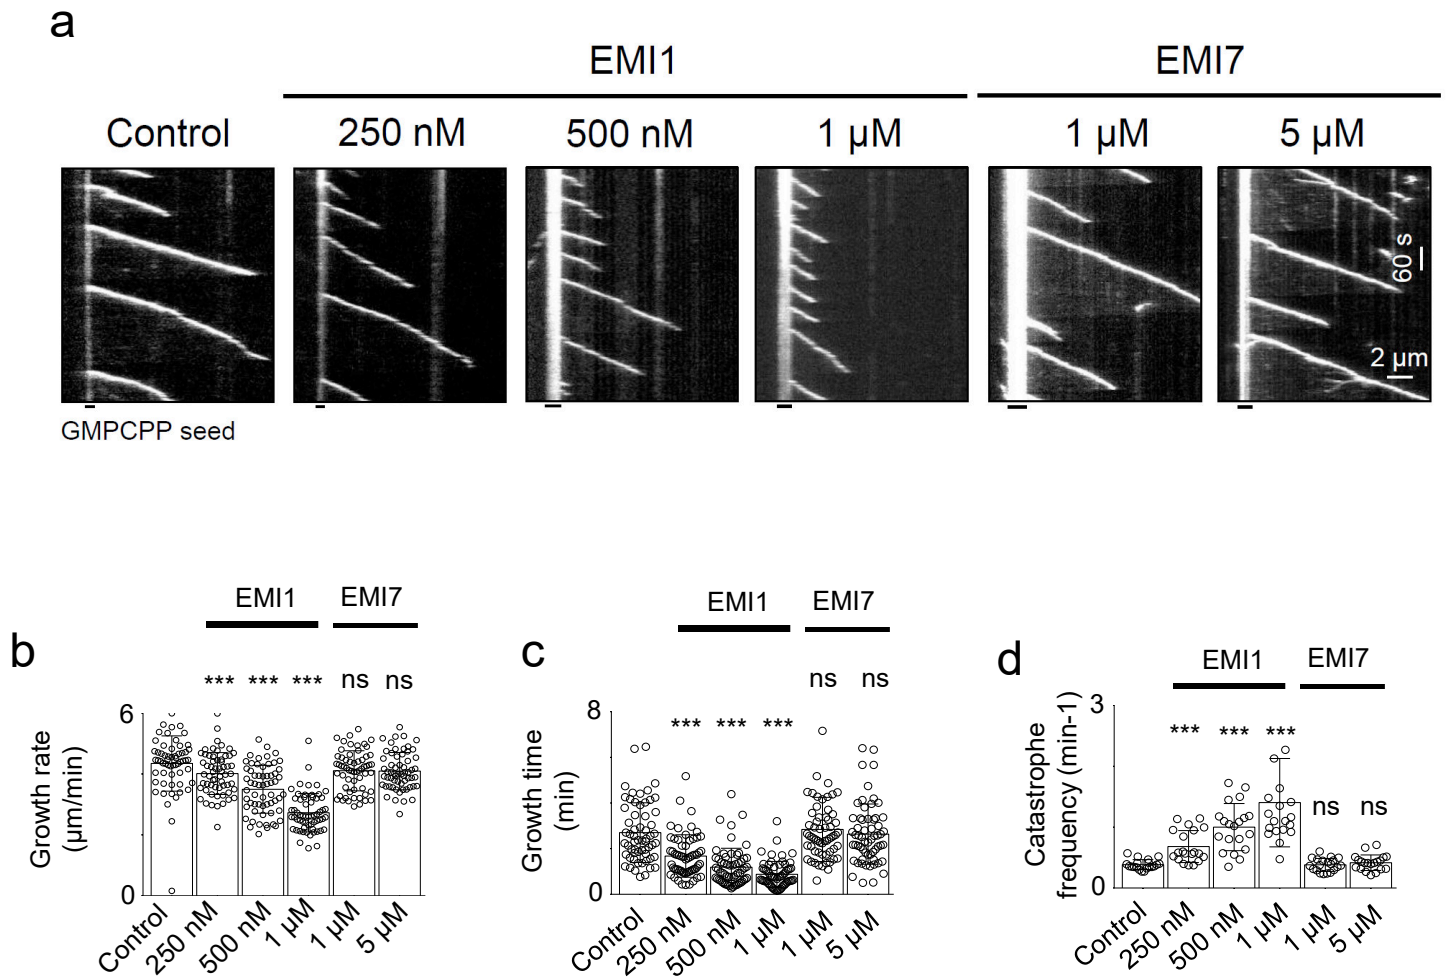

**Supplementary Figure 12.** Assessing the effect of EMI1 and EMI7 on microtubule dynamics *in vitro*. (a) Representative kymographs showing the effect of EMI1 and EMI7 on microtubule polymerization from GMPCPP stabilized microtubule seeds in the presence of plus-end binding protein EB3. (b) Quantification of microtubule growth rate.  $n = 60$  in each case. (c) Quantification of microtubule growth time.  $n = 60$  in each case. (d) Quantification of microtubule catastrophe frequency. Catastrophe frequencies were quantified as an inverted average growth time per microtubule.  $n = 20$  in each case. EMI1 reduces microtubule growth and increases catastrophe frequency, while EMI7 does not. 2 independent sets of experiments. Results are shown as the average  $\pm$  SD. P-value was calculated using the Mann-Whitney test, comparing treatment to DMSO control. \*\*\*P value  $< 0.0001$ . ns, not significant.

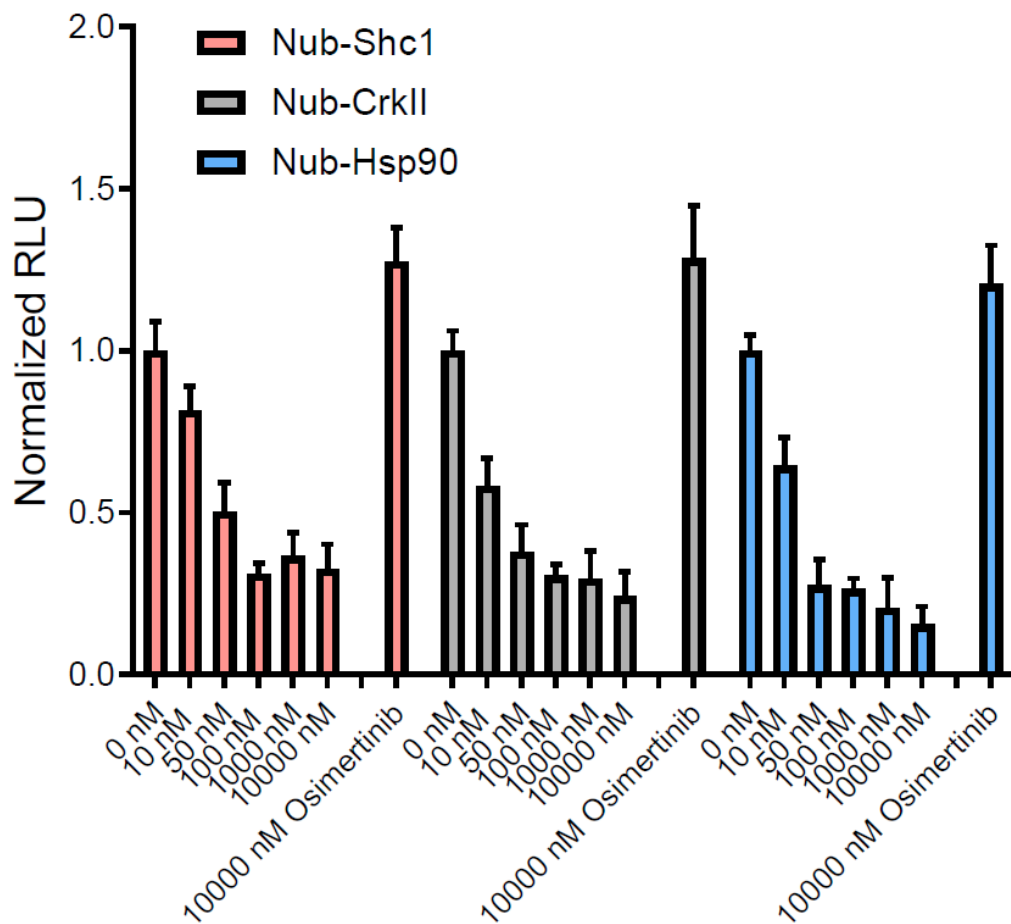

**Supplementary Figure 13.** MaMTH-DS assays showing that compound EMI1 is not a specific protein-protein interaction inhibitor. EMI1 at various concentrations (as indicated) reduces the interaction of EGFR L858R/T790M/C797S with Shc1, CrkII and Hsp90 in a dose-dependent manner. Osimertinib negative control, which does not target the triple mutant, has no effect at even high concentration. Data was normalized to DMSO control and shown as the average  $\pm$  SD for three independent experiments.

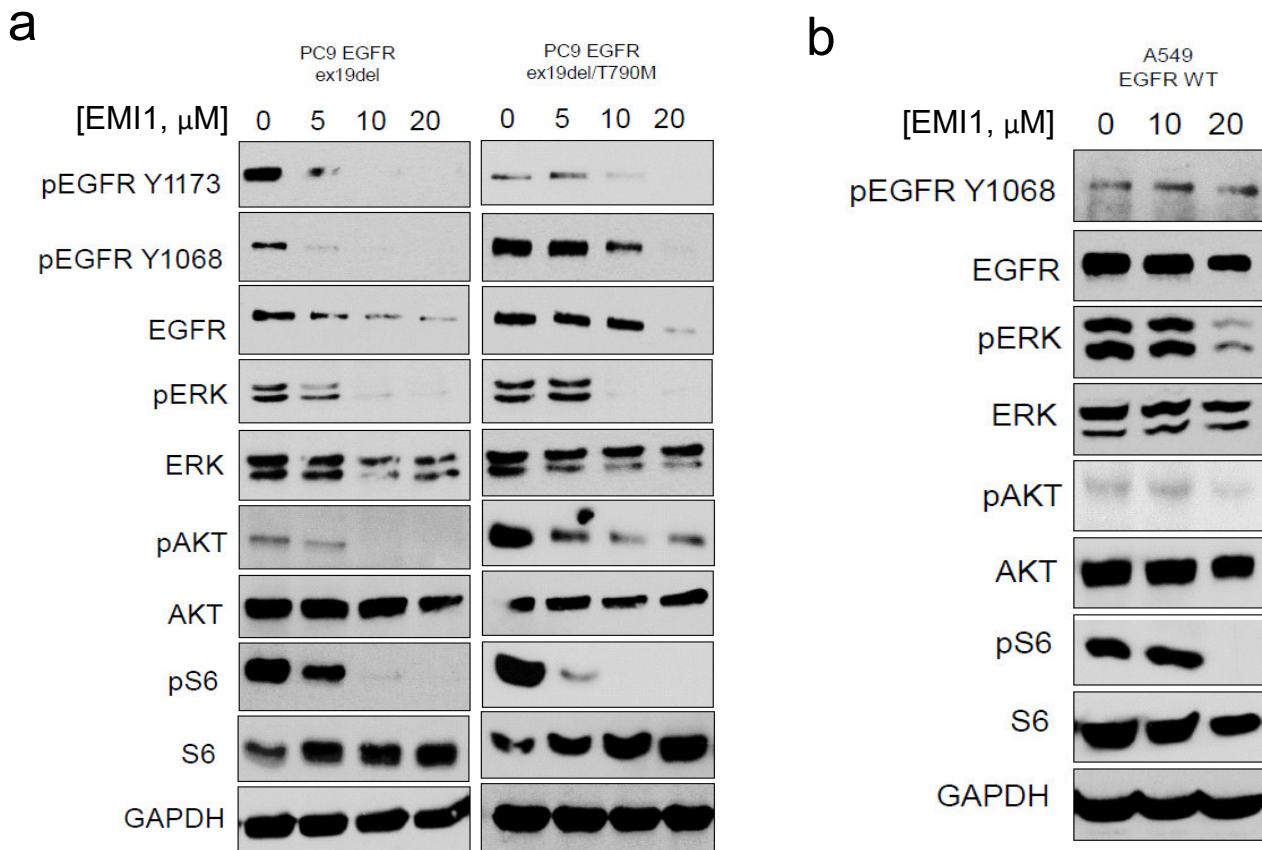

**Supplementary Figure 14.** EMI1 induces mutant-EGFR degradation and impairs its signalling in NSCLC cells. (a) Effect of EMI1 on EGFR activation and downstream signalling in PC9 EGFR ex19del and PC9 EGFR ex19del/T790M cells. (c) Effect of EMI1 on EGFR activation and downstream signalling in A549 EGFR WT cells. Results are representative of at least two independent experiments. See Supplementary Fig 30 and 31 for source blot images.

## DMSO

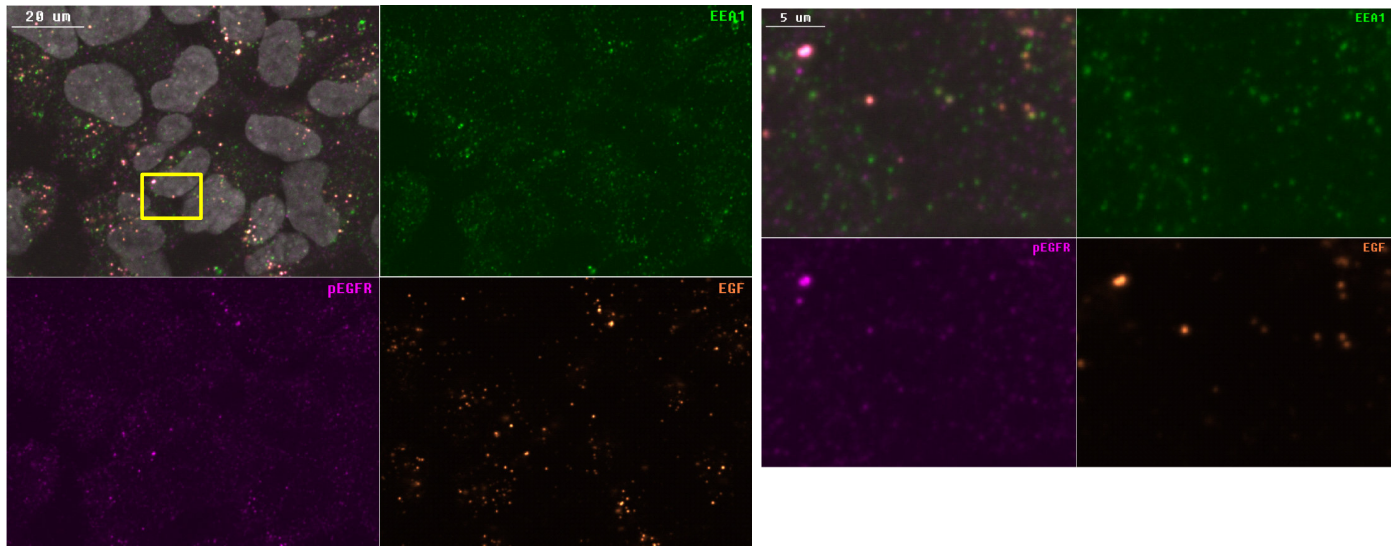

## EMI1

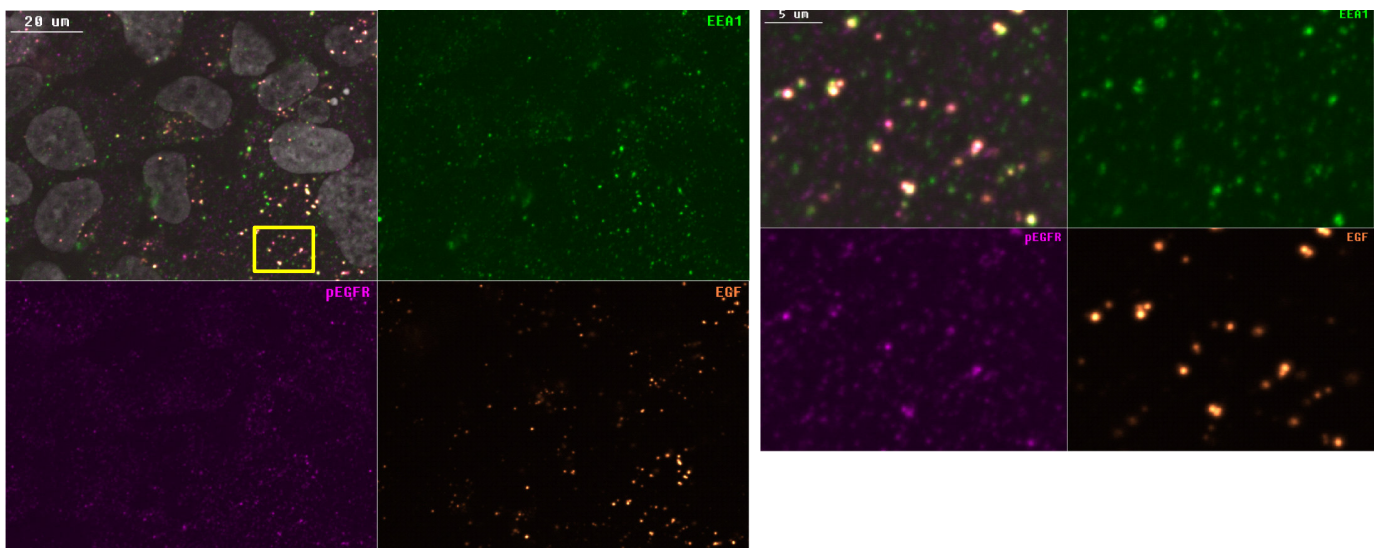

## Midostaurin

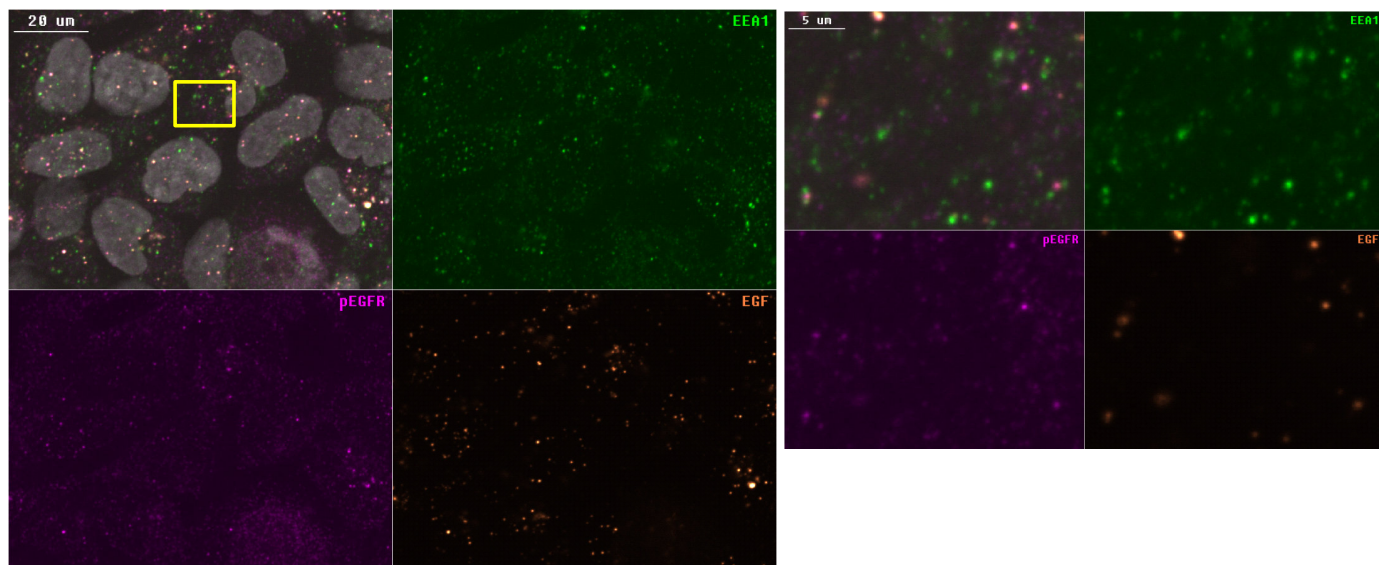

**Supplementary Figure 15.** Investigating effect of EMI1 and Midostaurin on activated EGFR WT endosomal trafficking. Images in zoom show higher magnification (scale bar is 5 μm) of representative vesicular signals. Results are representative of at least two independent experiments.

## DMSO

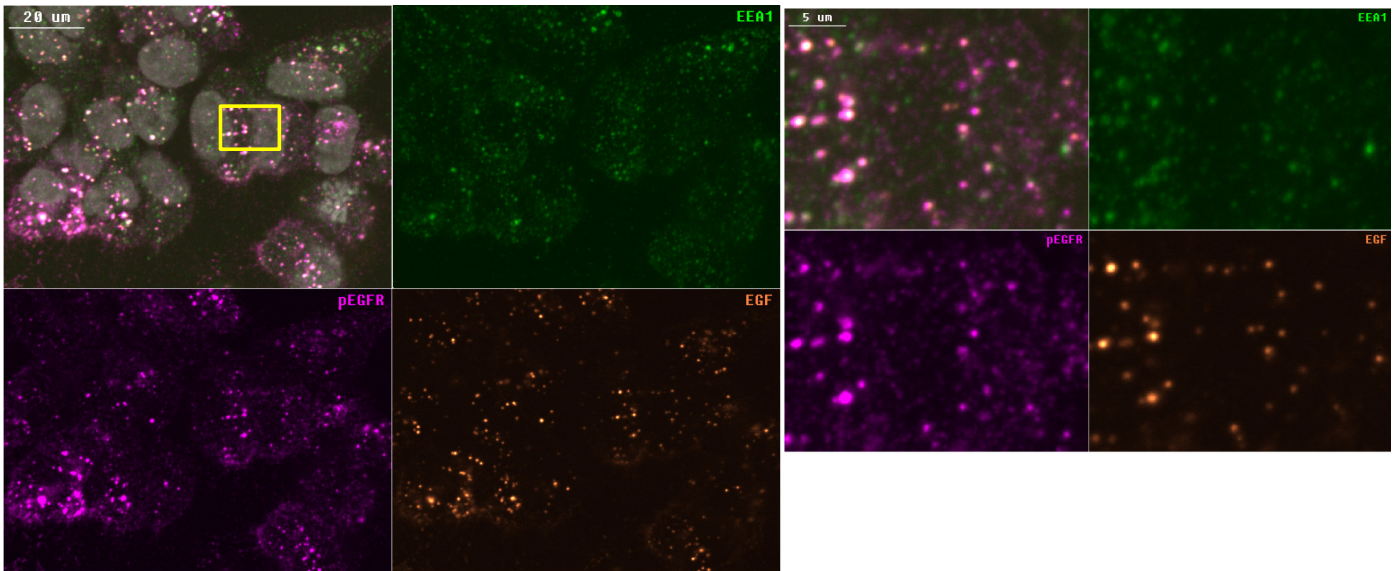

## EMI1

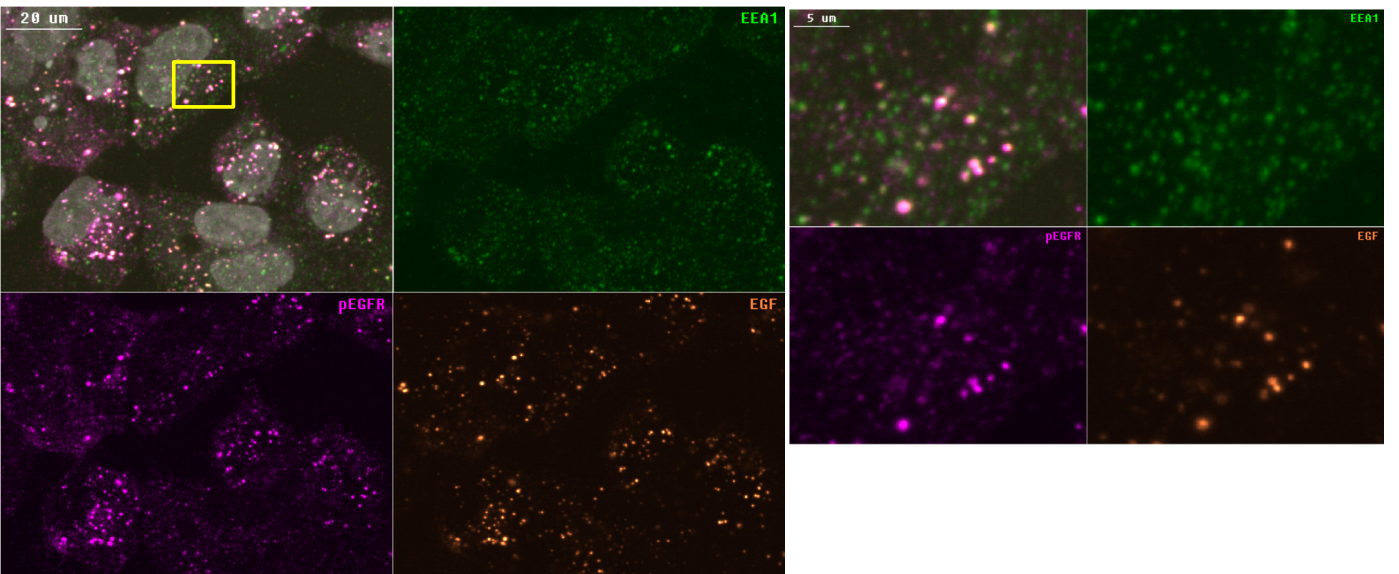

## Midostaurin

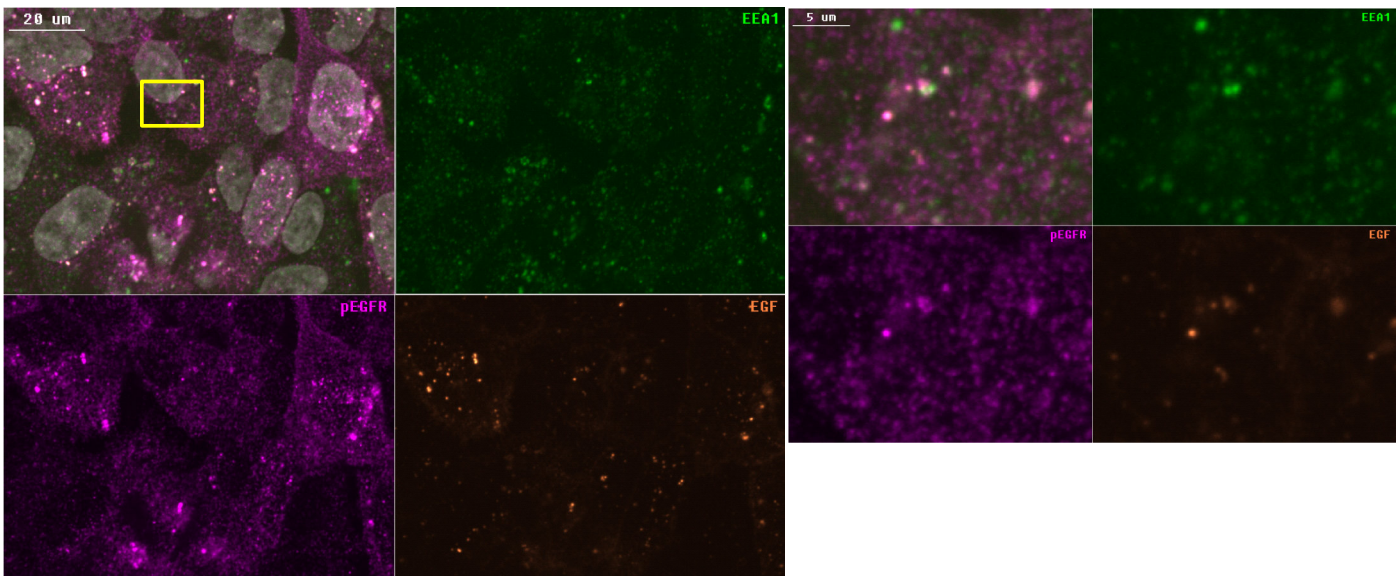

**Supplementary Figure 16.** Investigating effect of EMI1 and Midostaurin on activated EGFR L858R/T790M/C797S endosomal trafficking. Images in zoom show higher magnification (scale bar is 5  $\mu$ m) of representative vesicular signals. Results are representative of at least two independent experiments.



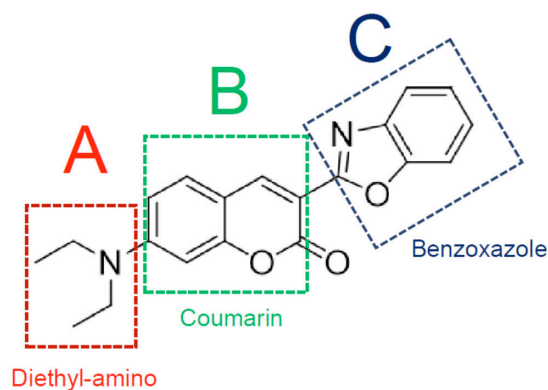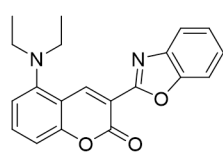

EMI44

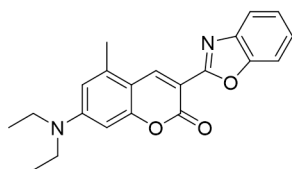

EMI45

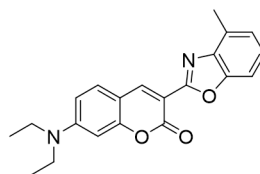

EMI46

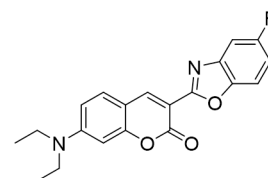

EMI47

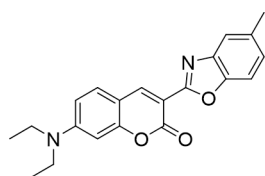

EMI48

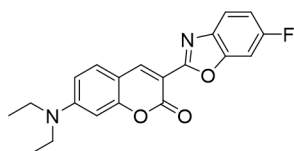

EMI49

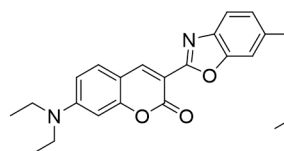

EMI50

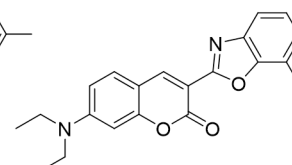

EMI51

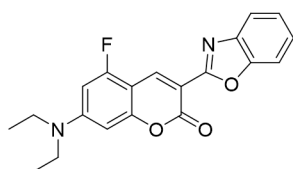

EMI52

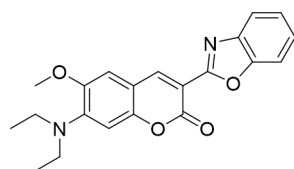

EMI53

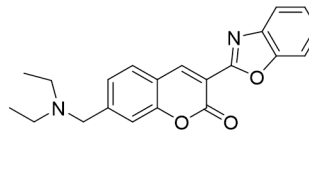

EMI54

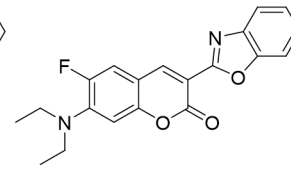

EMI55

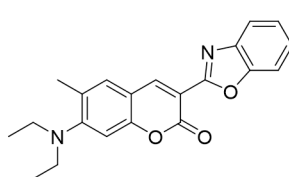

EMI56

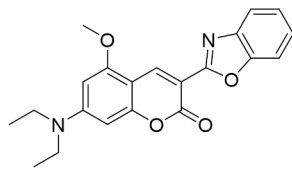

EMI57

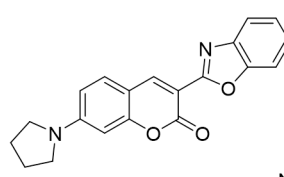

EMI58

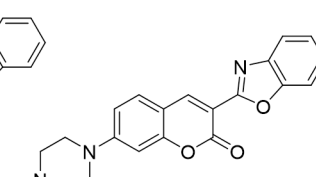

EMI59

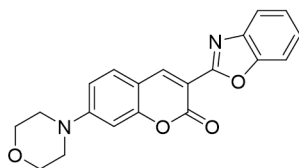

EMI60

**Supplementary Figure 17.** Structures of 17 analogs of EMI1 generated using medicinal chemistry. Further information on medicinal chemistry synthesis schemes can be found in Supplementary Note 2. <sup>1</sup>H NMR, <sup>13</sup>C NMR and HRMS spectra are provided for EMI48 and EMI56 in Supplementary Note 2.

PC9 EGFR ex19del/T790M/C797S cells

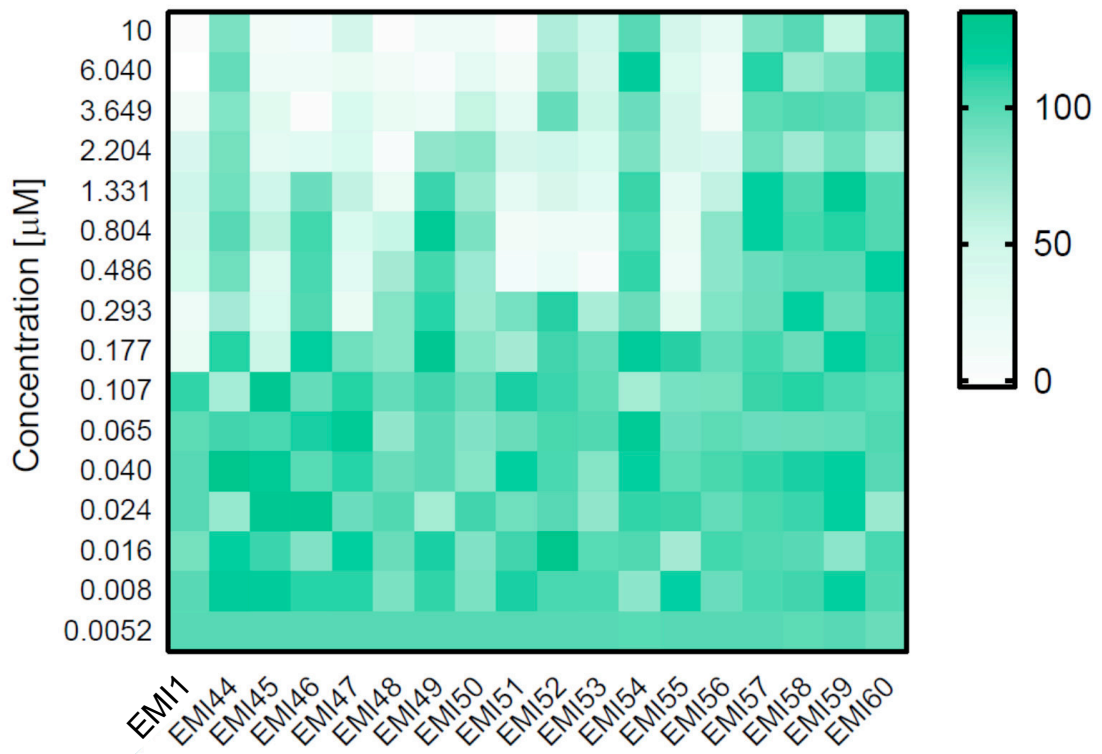

**Supplementary Figure 18.** Effect of EMI1 derivatives on viability of PC9 EGFR ex19del/T790M/C797S cells. Results are shown as single 16-point dose response experiments

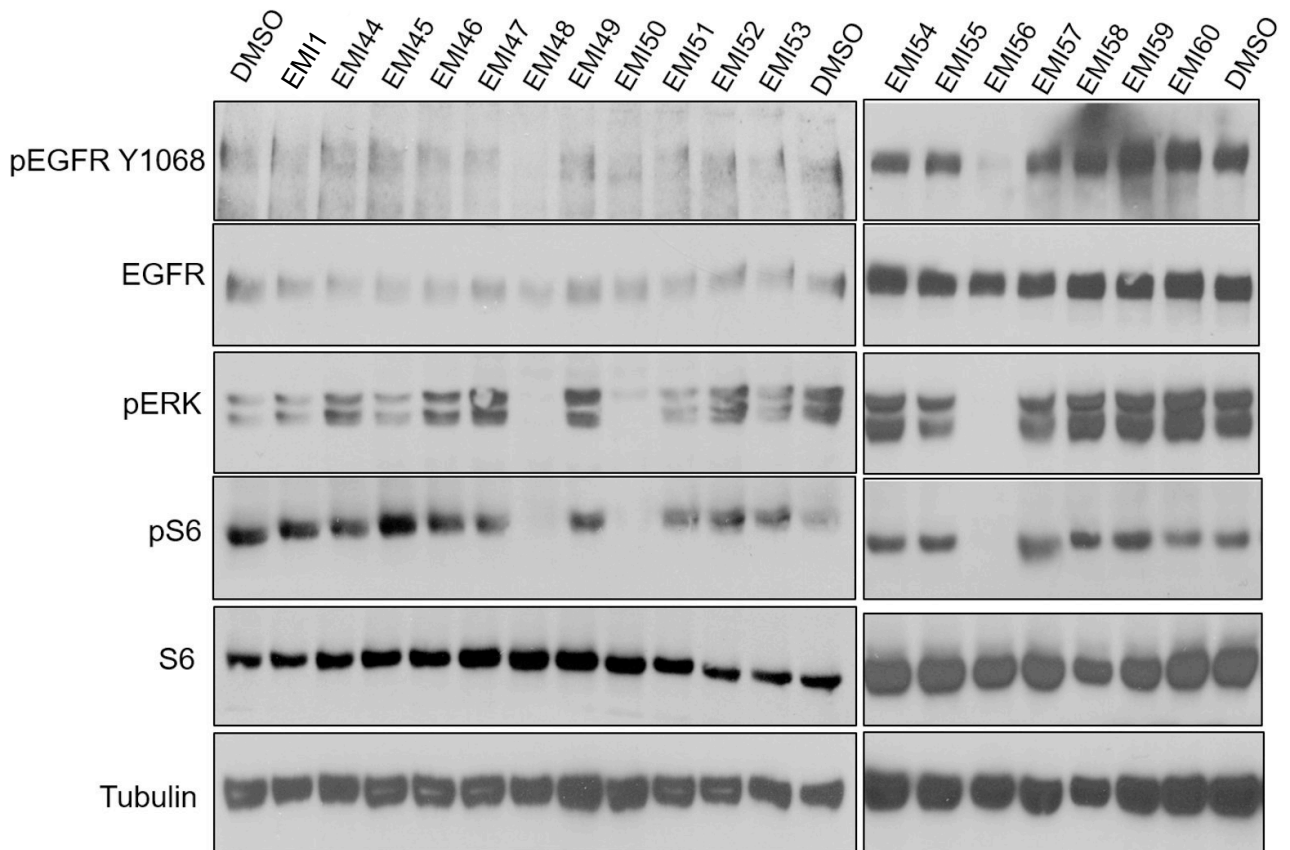

**Supplementary Figure 19.** Effect of EMI1 derivatives on EGFR activation and downstream signalling in PC9 EGFR ex19del/T790M/C797S cells. Results are representative of at least two independent experiments. See Supplementary Fig 32 for source blot images.

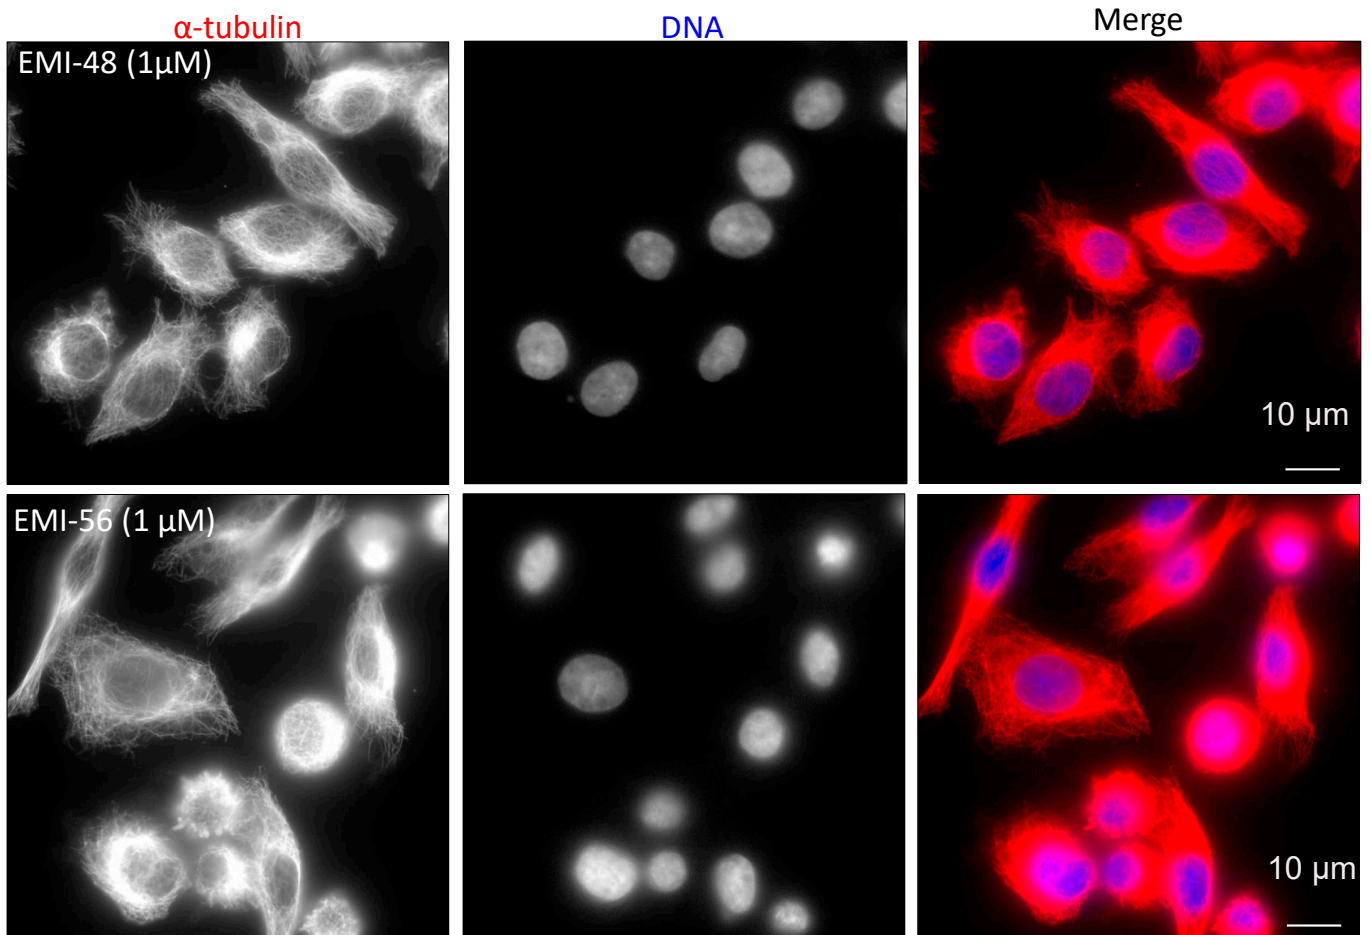

**Supplementary Figure 20.** Assessing the effect of EMI48 and EMI56 on microtubule dynamics in PC9 EGFR ex19del/T790M/C797S cells. Both analogs do not affect interphase microtubules and don't perturb spindle formation. PC9 cells were incubated with 1 μM EMI48 (upper panel) or EMI56 (lower panel) for 20 hours. Scale bar is 10 μm. Results are representative of at least two independent experiments.

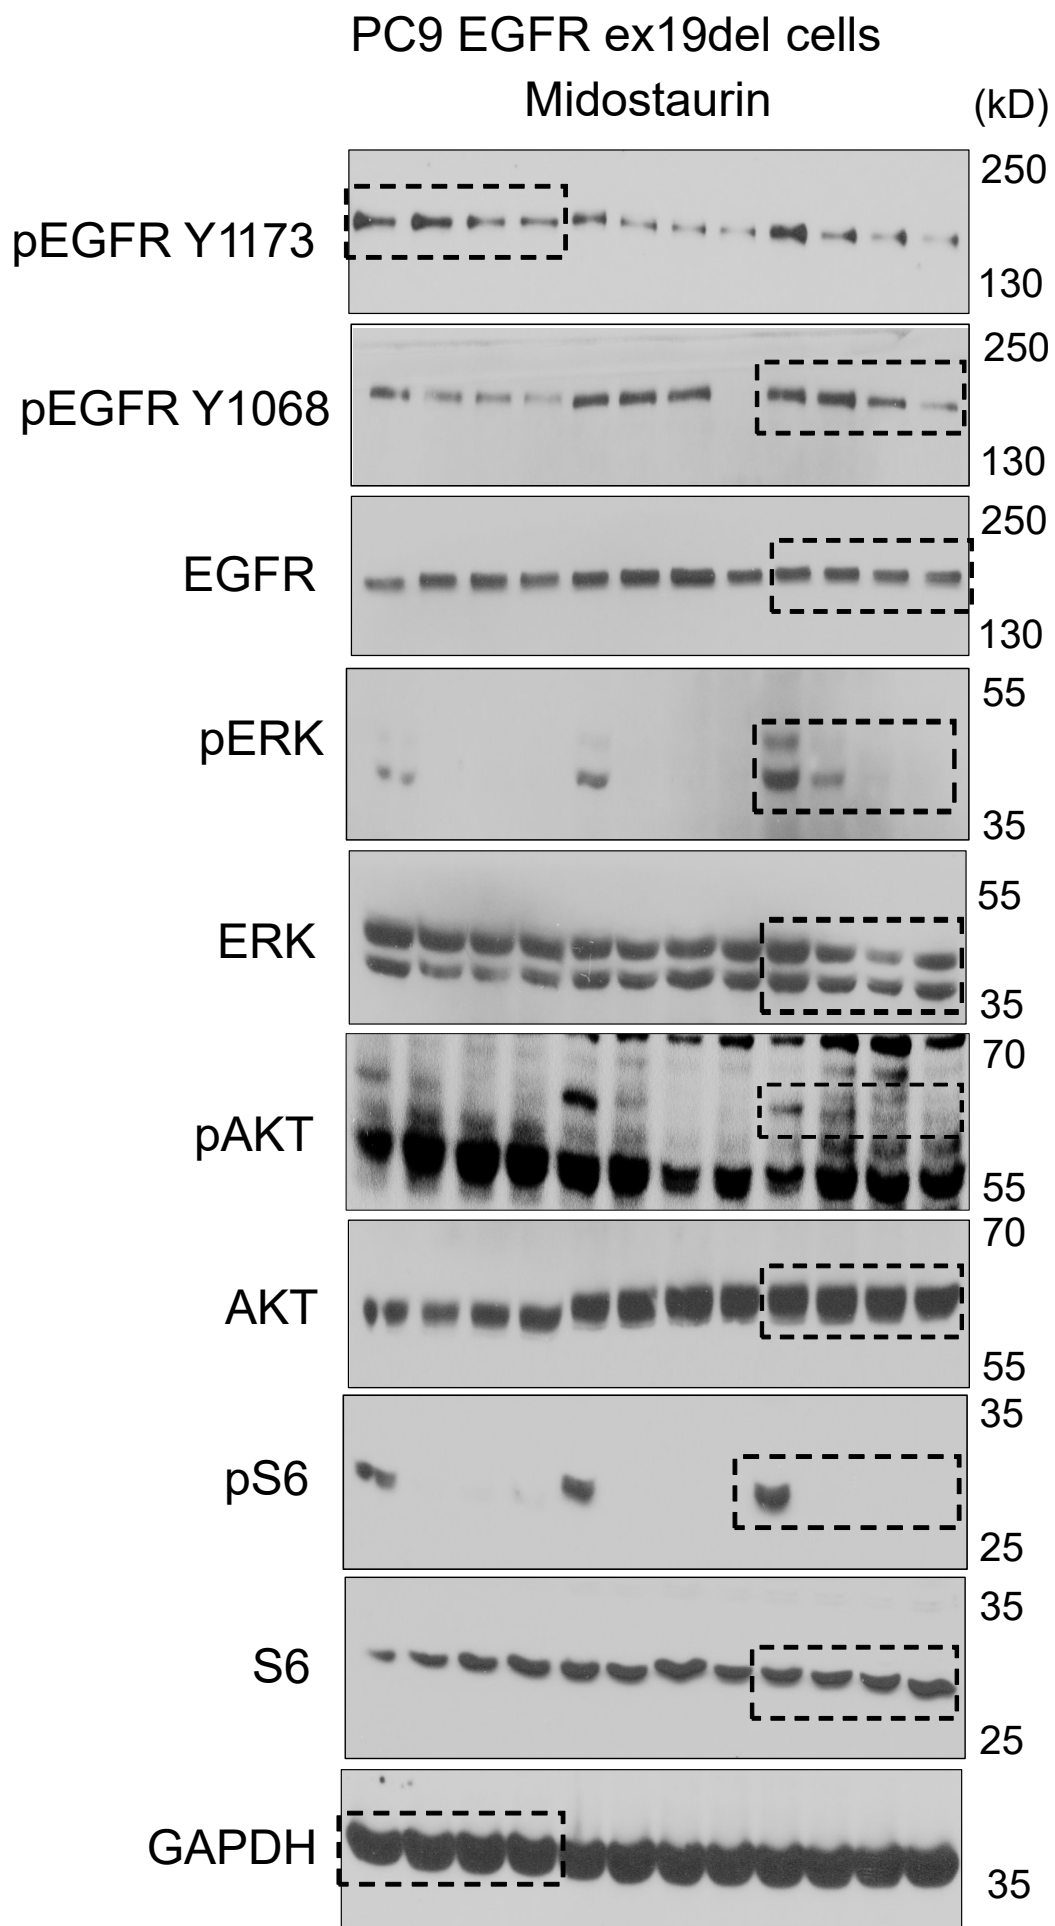

**Supplementary Figure 21.** Source blot images for Figure 2c Midostaurin treatment of PC9 ex19del cells.

PC9 EGFR ex19del/T790M/C797S cells

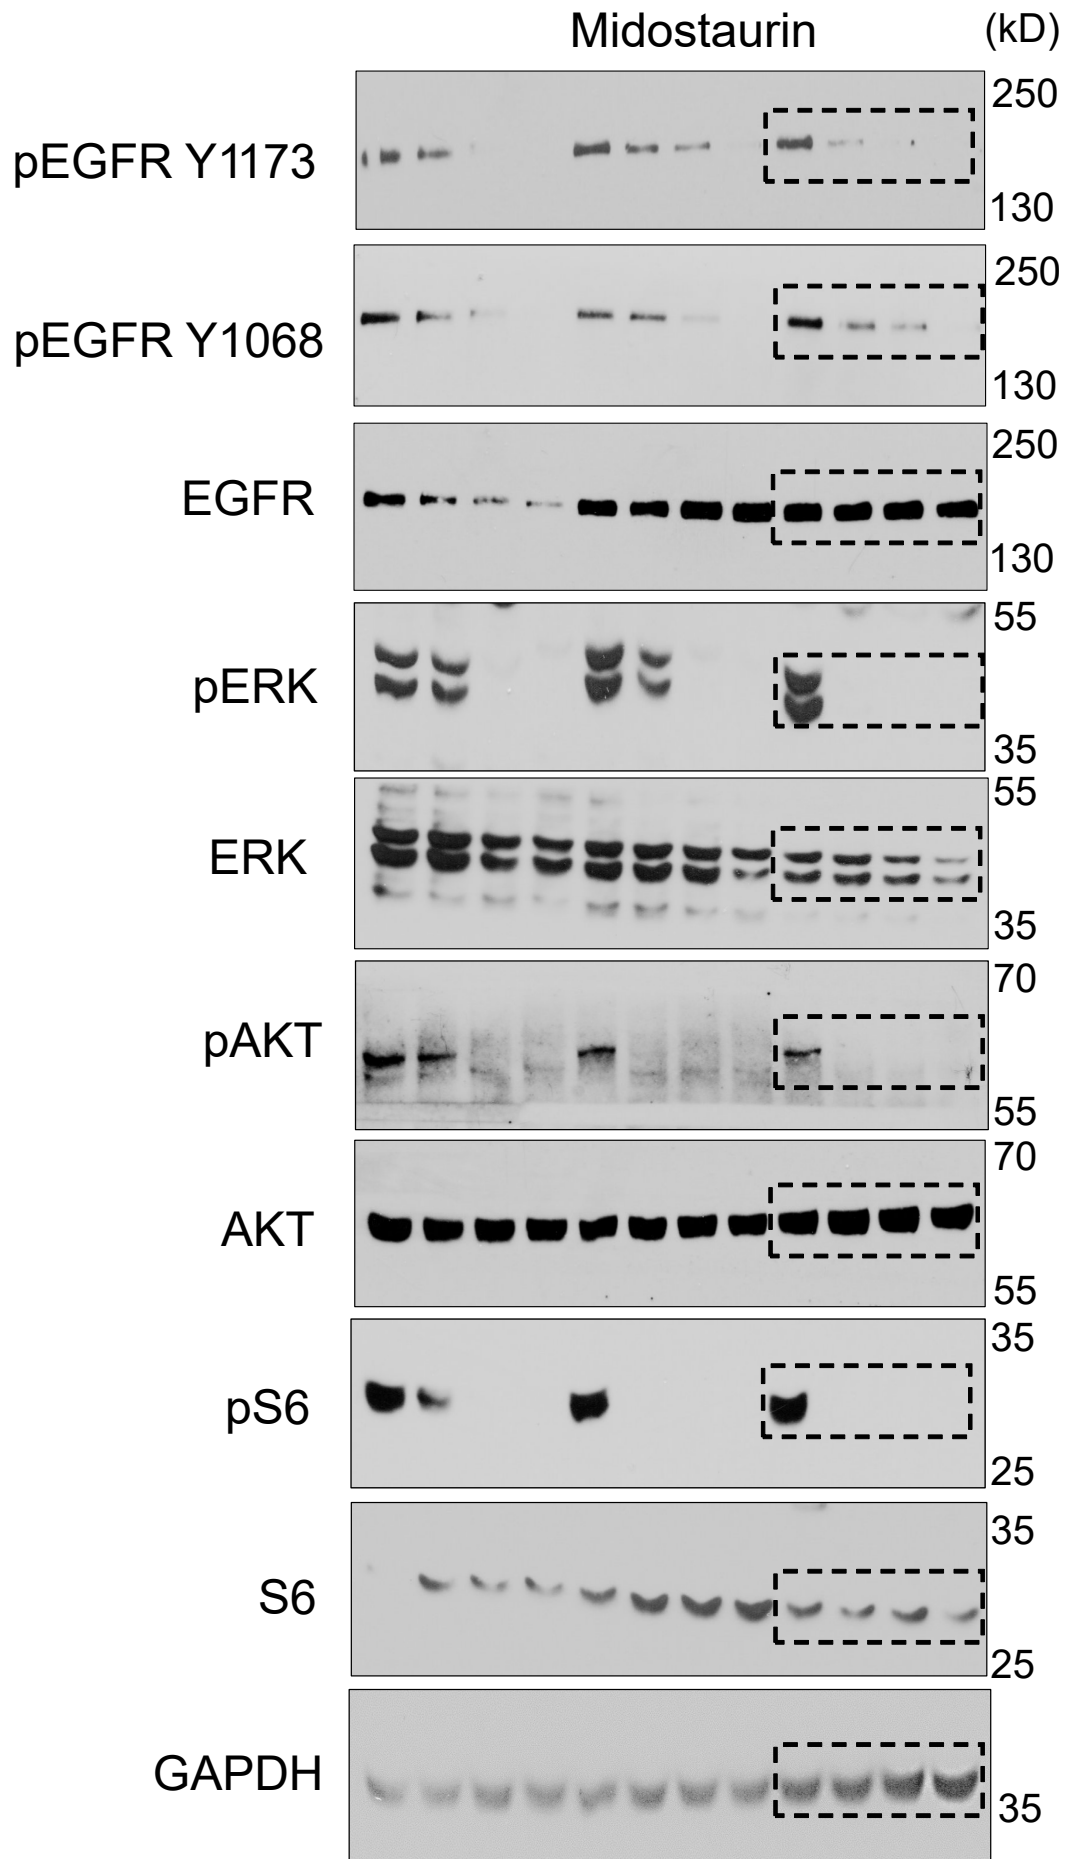

**Supplementary Figure 22.** Source blot images for Figure 2c Midostaurin treatment of PC9 ex19del/T790M/C797S cells.

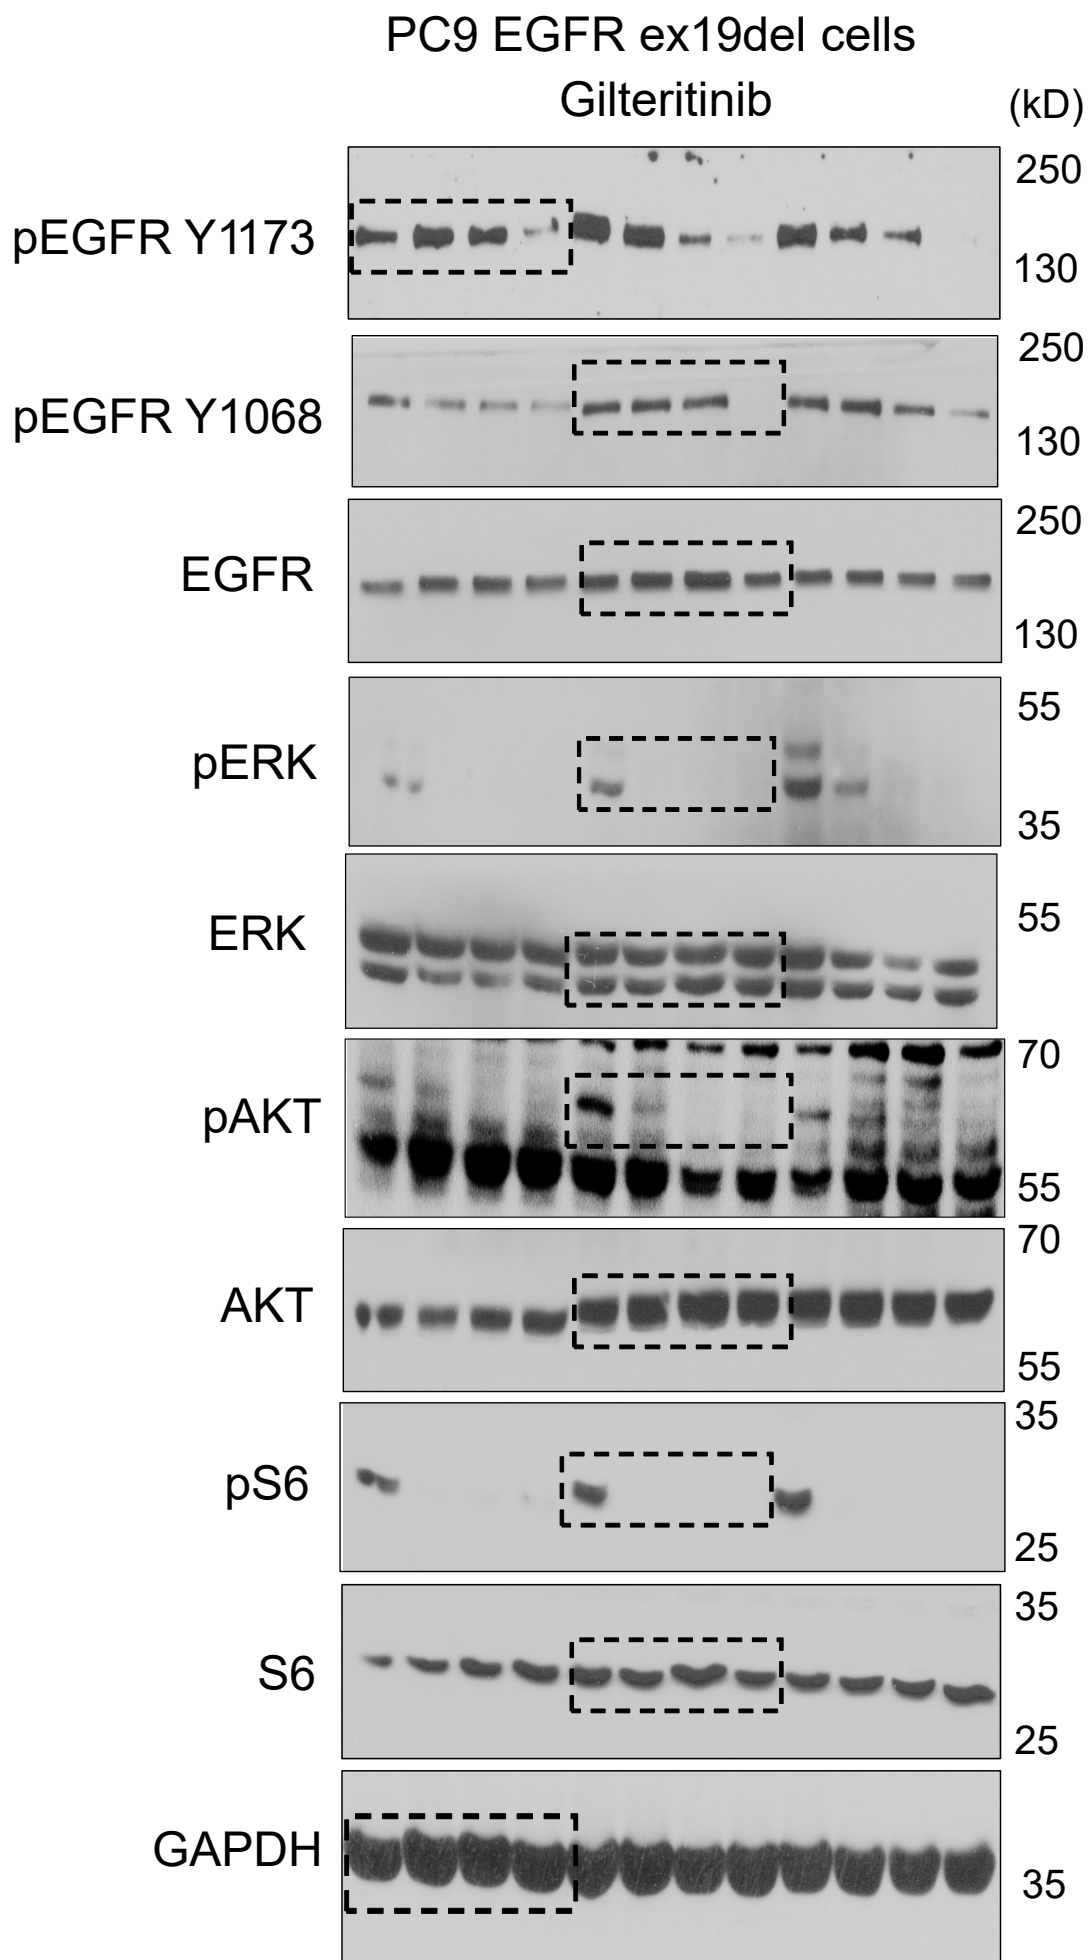

**Supplementary Figure 23.** Source blot images for Figure 2c Gilteritinib treatment of PC9 ex19del cells.

PC9 EGFR ex19del/T790M/C797S cells

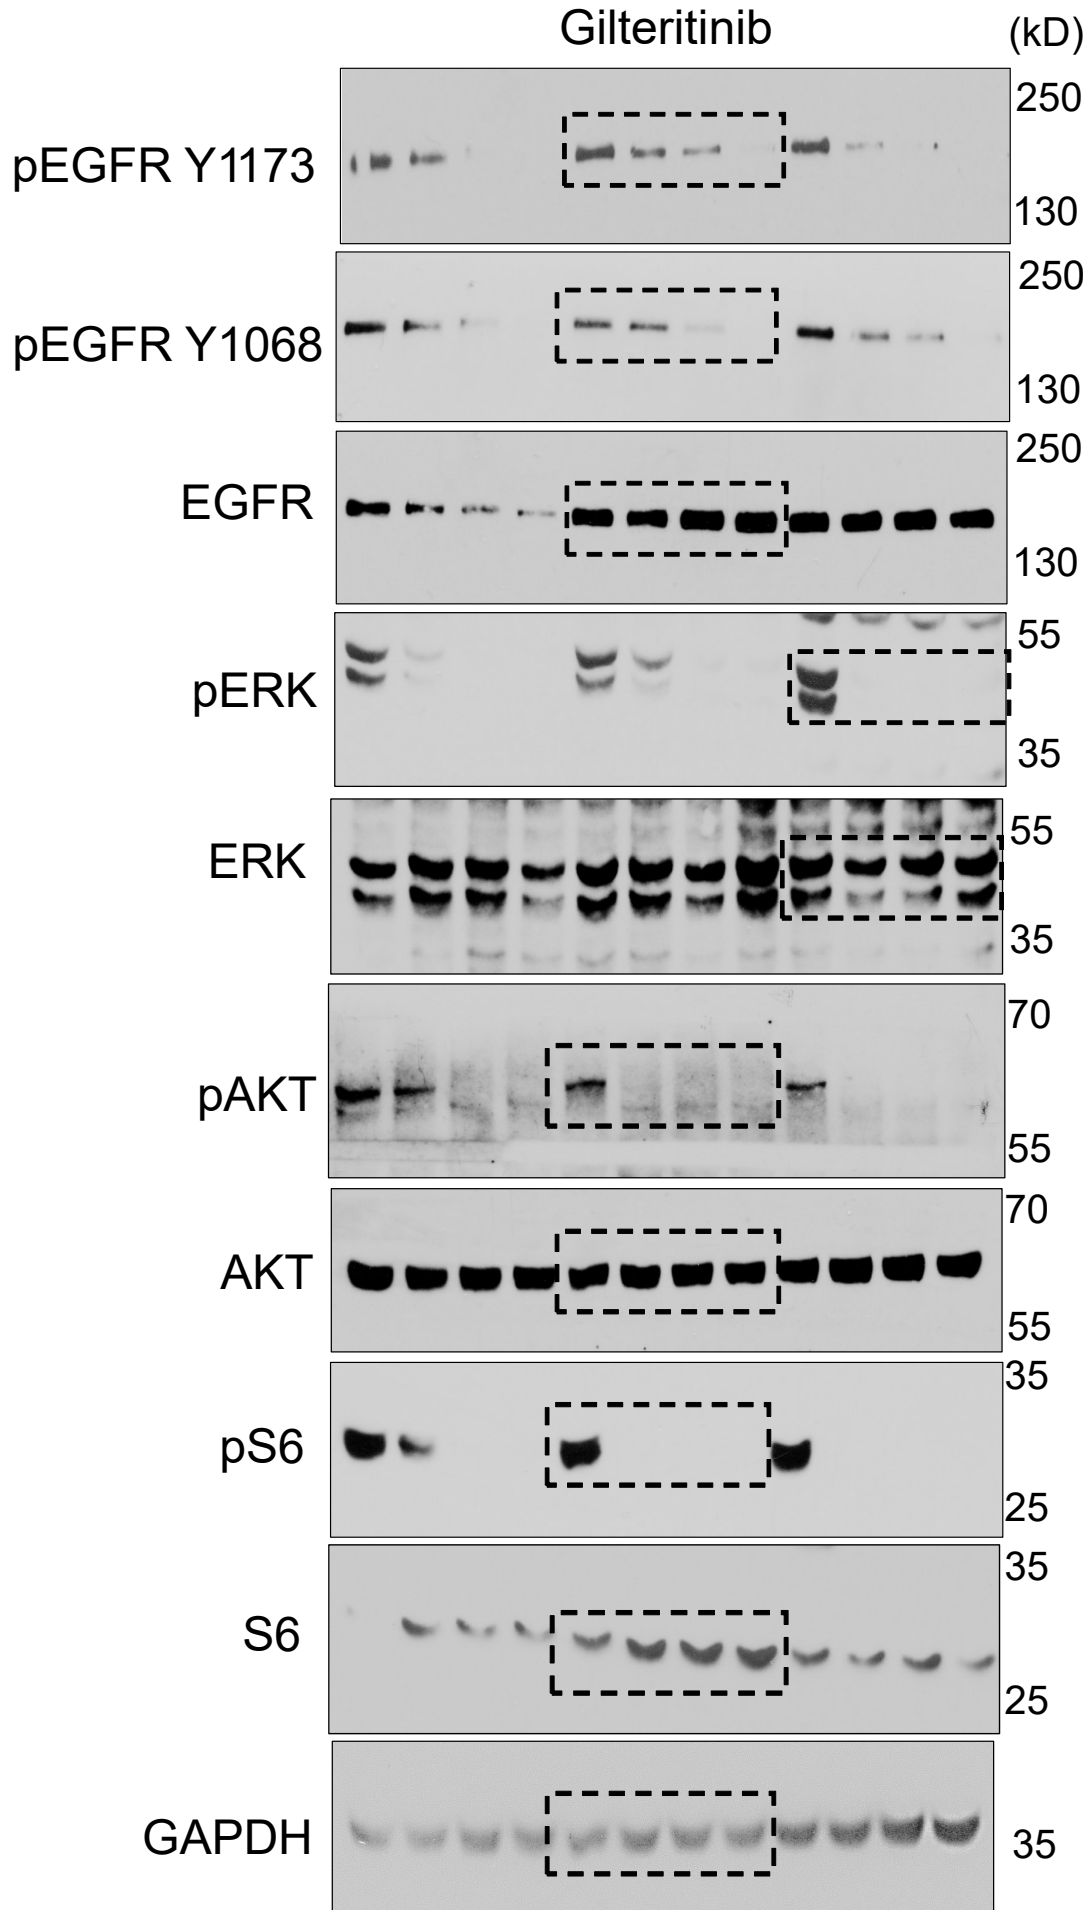

**Supplementary Figure 24.** Source blot images for Figure 2c gilteritinib treatment of PC9 ex19del/T790M/C797S cells.



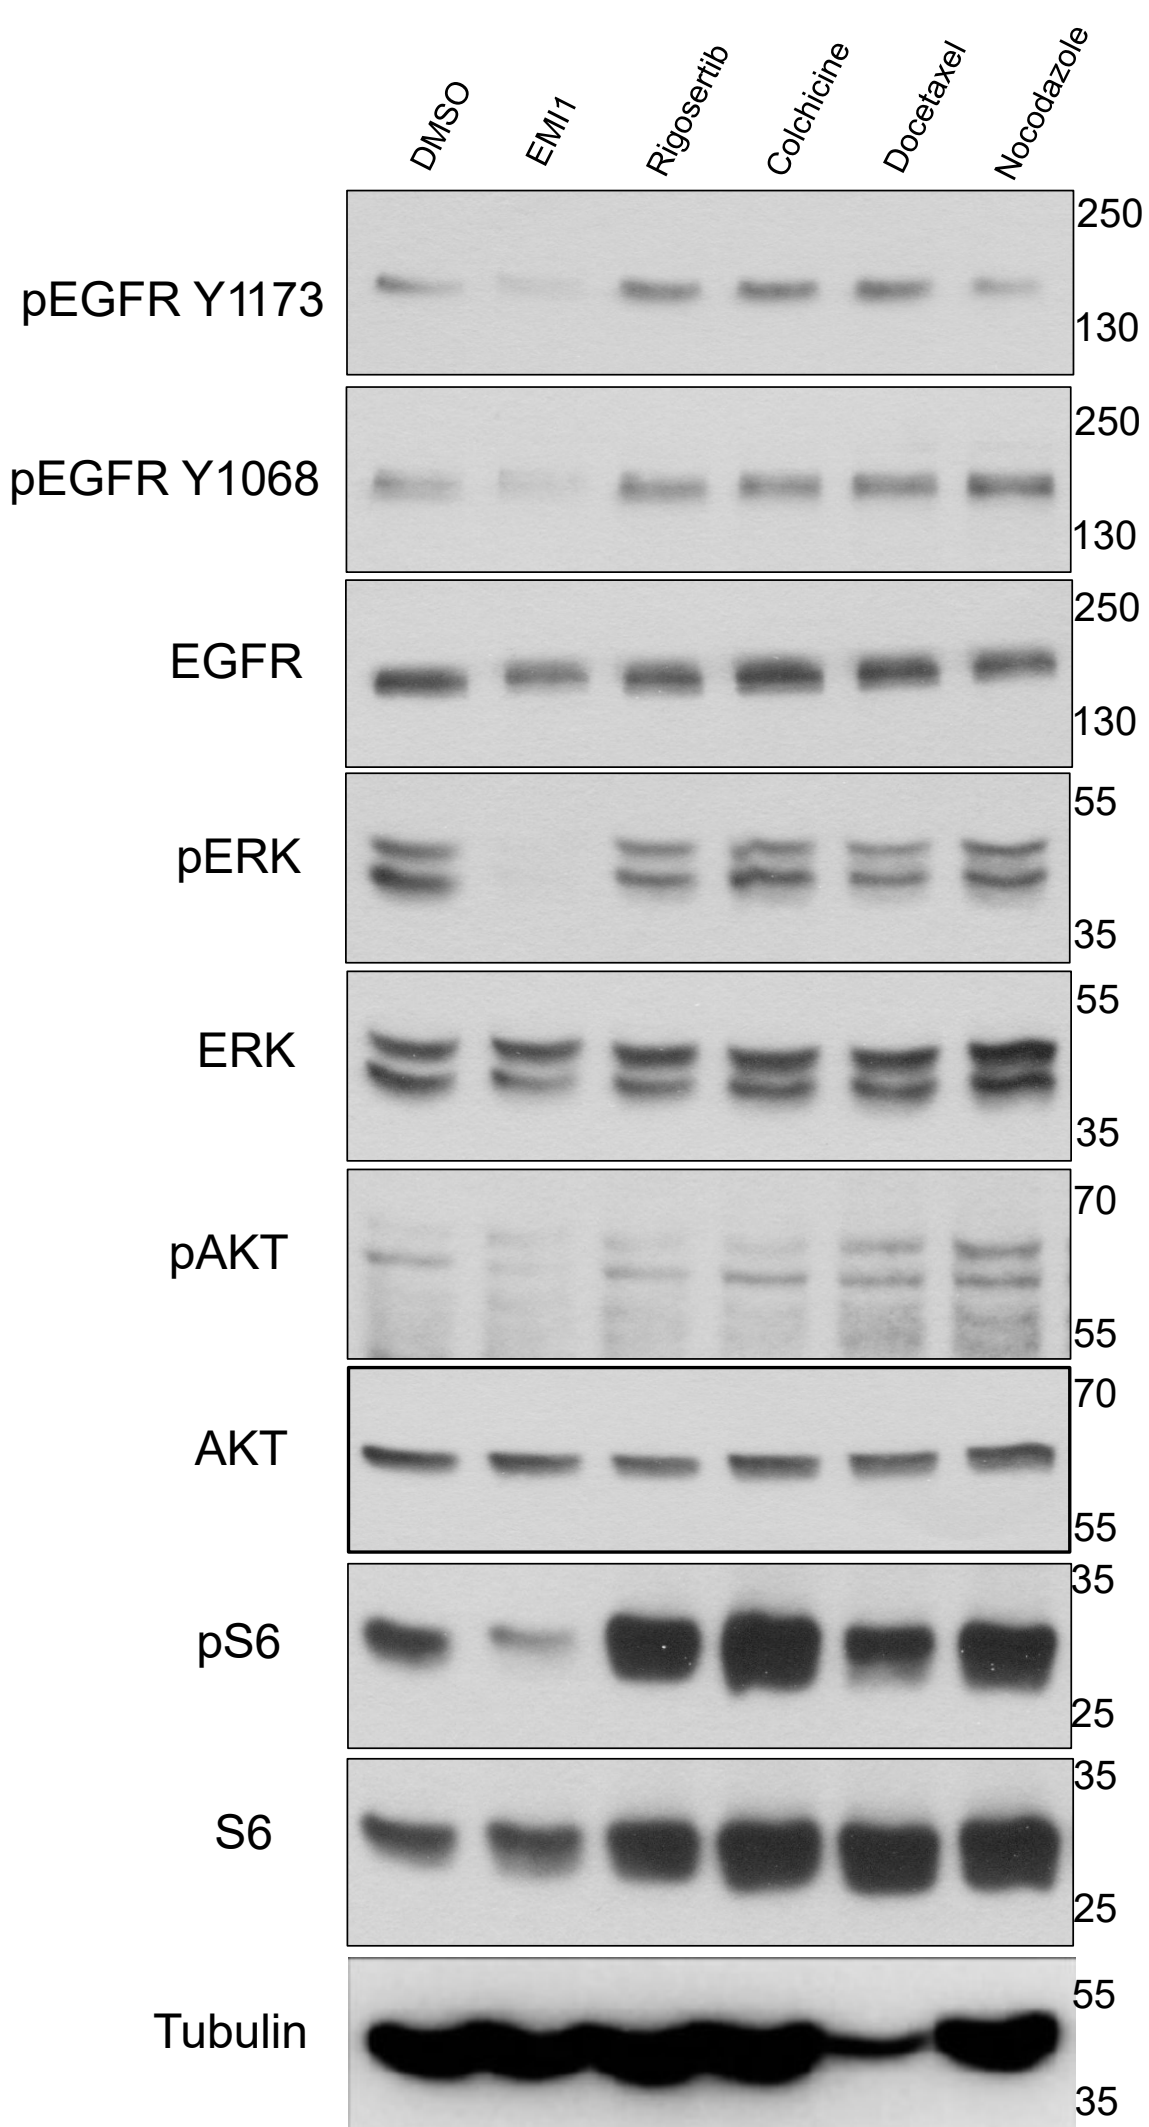

Supplementary Figure 25. Source blot images for Figure 3g.

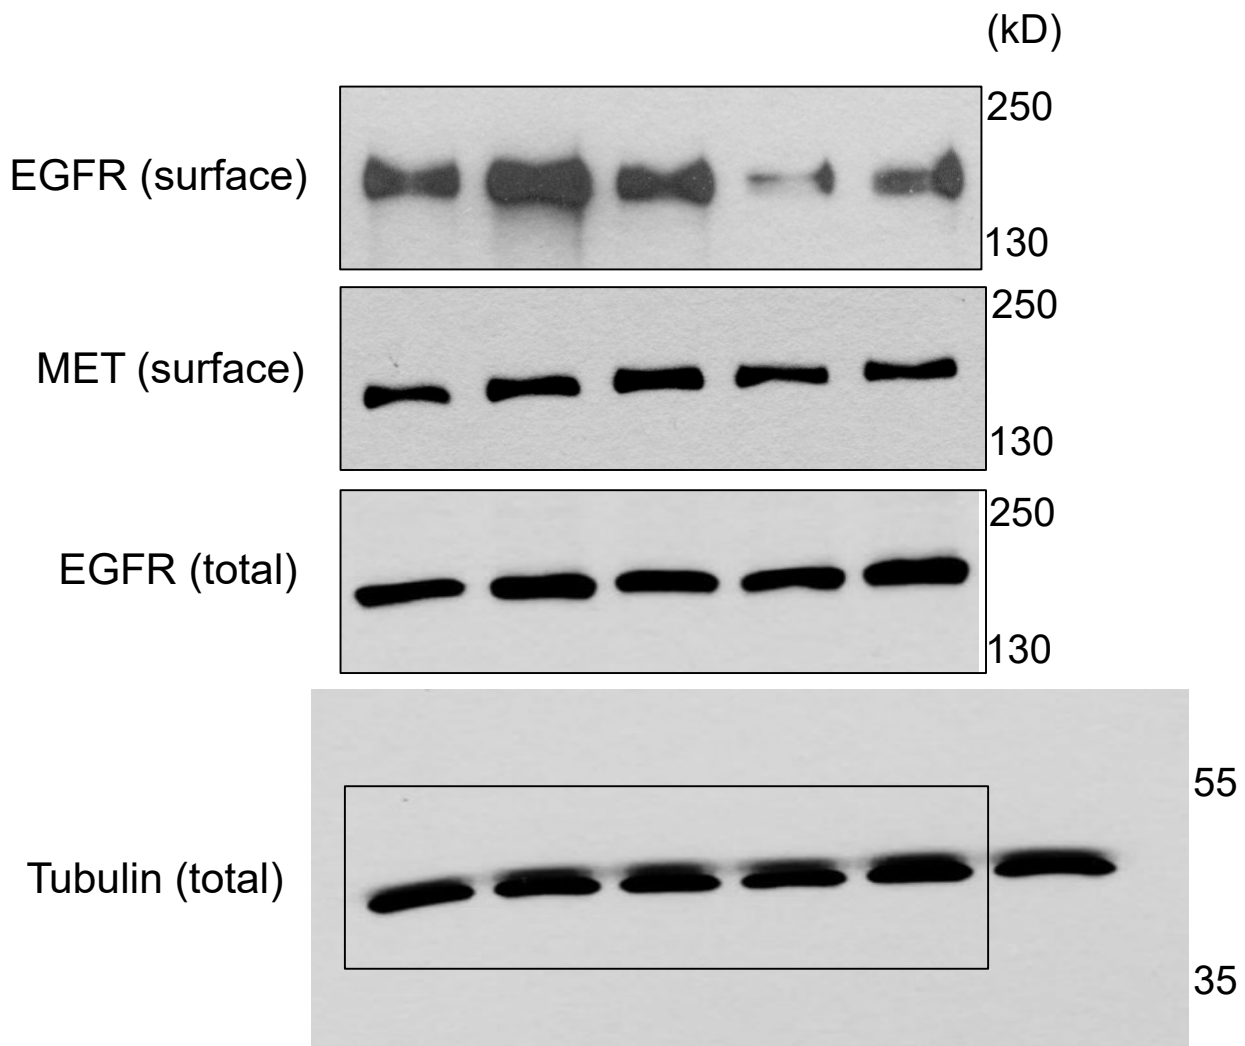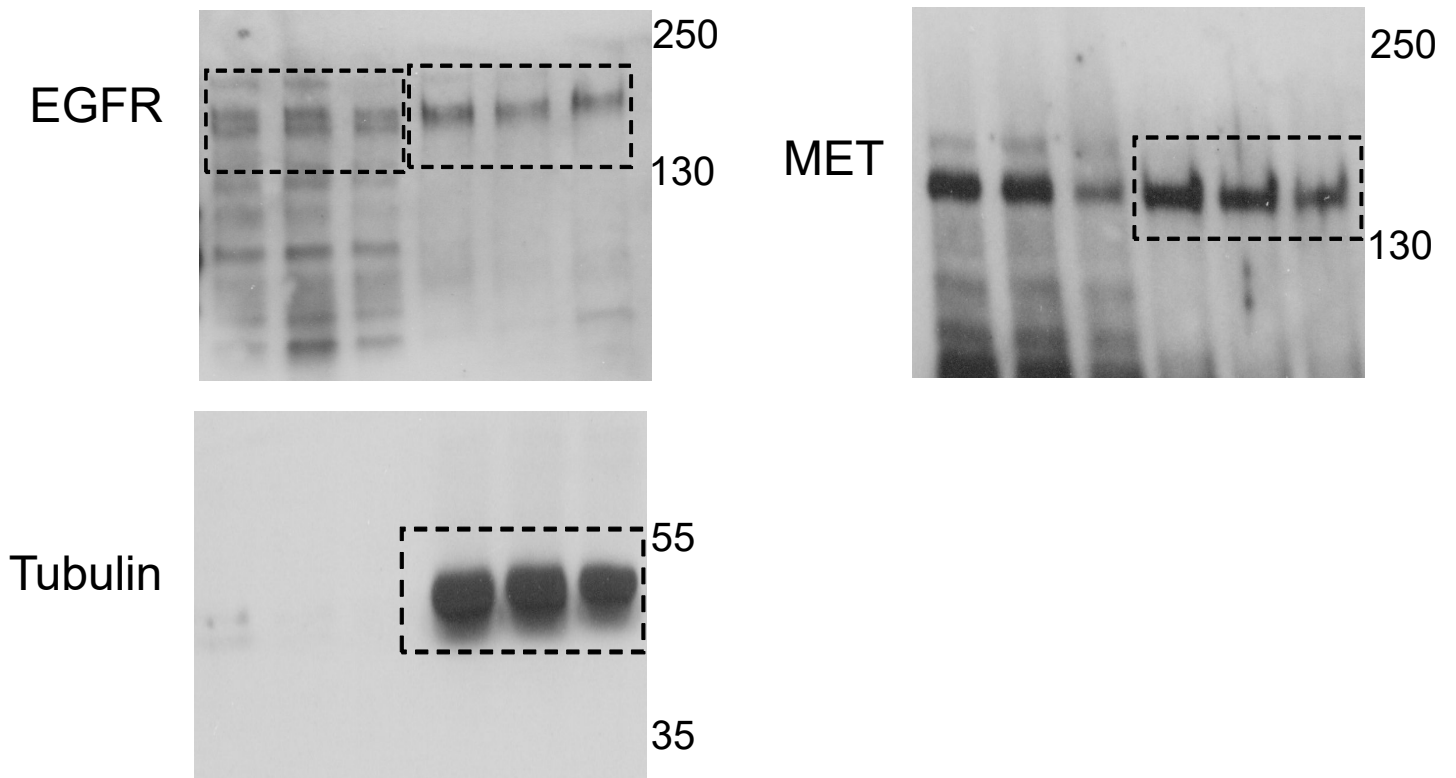

**Supplementary Figure 26.** Source blot images for Figure 4c and 4d.

PC9 EGFR ex19del/T790M/C797S cells

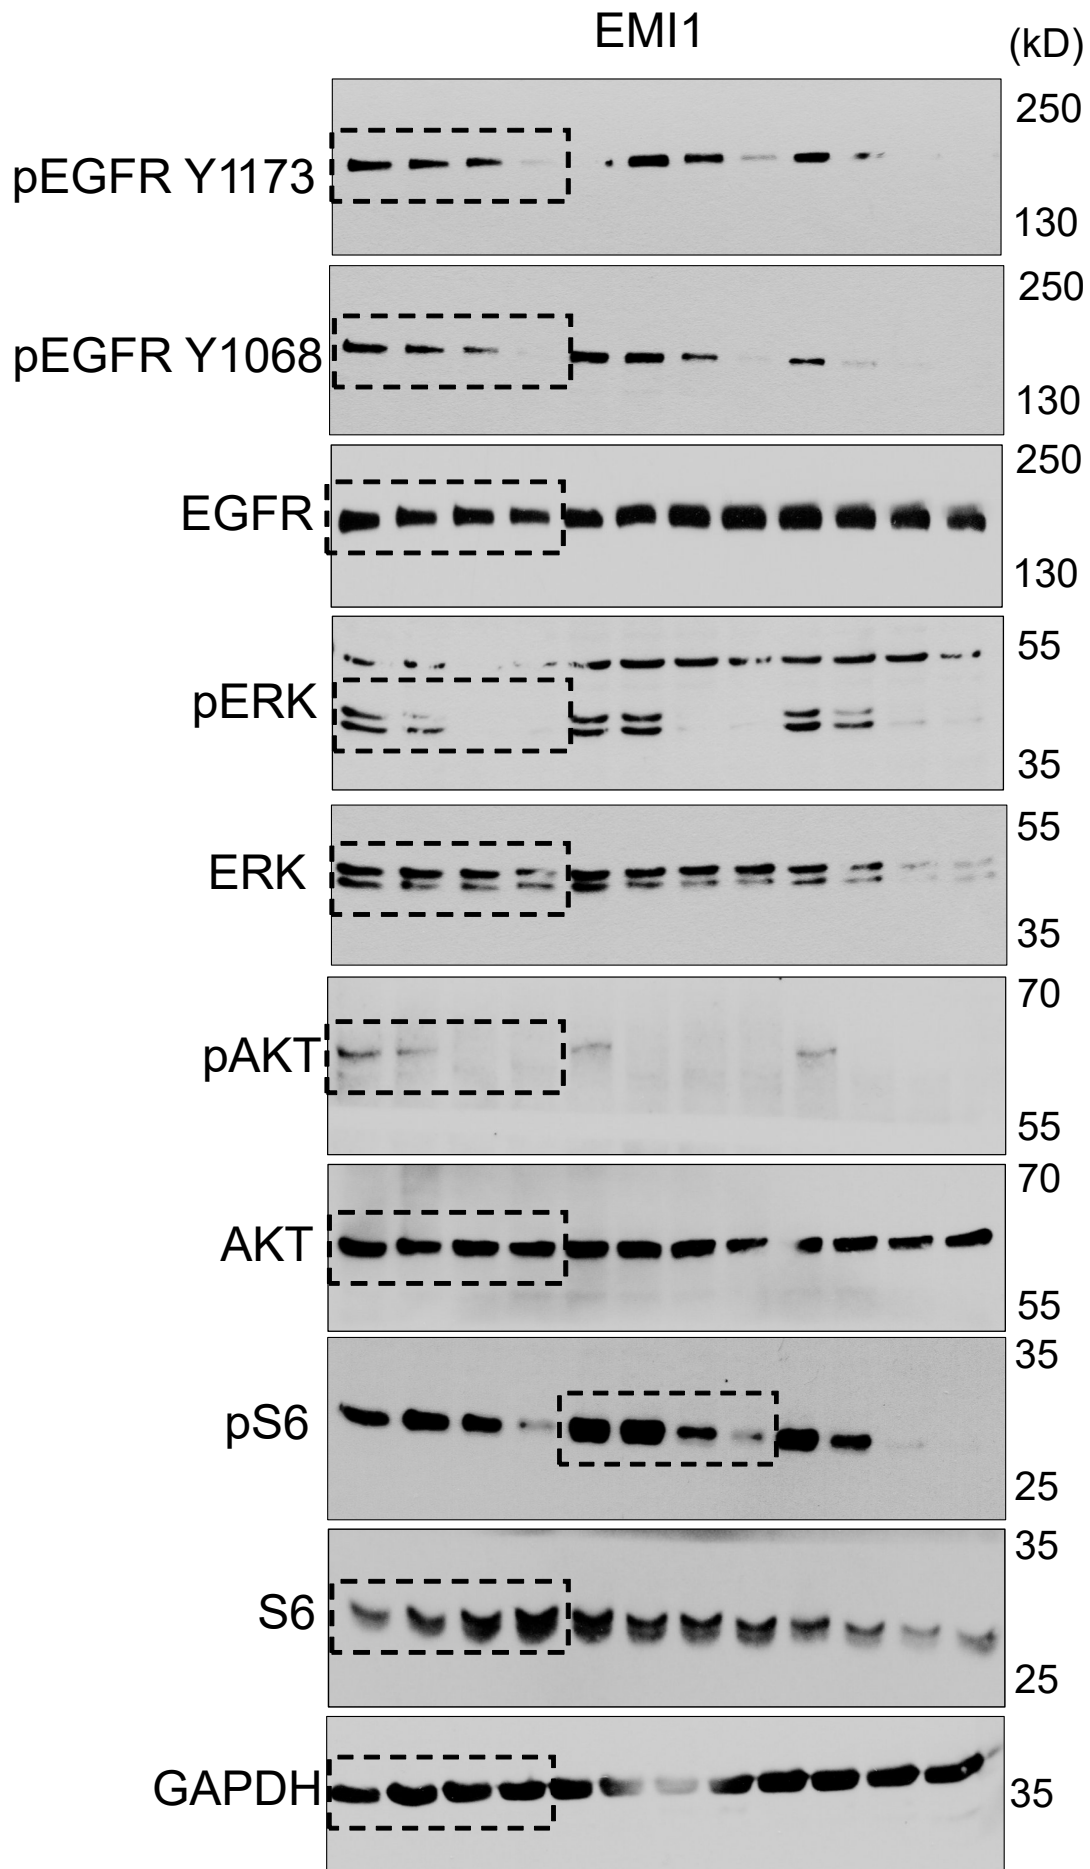

Supplementary Figure 27. Source blot images for Figure 5a..

PC9 EGFR ex19del/T790M/C797S cells

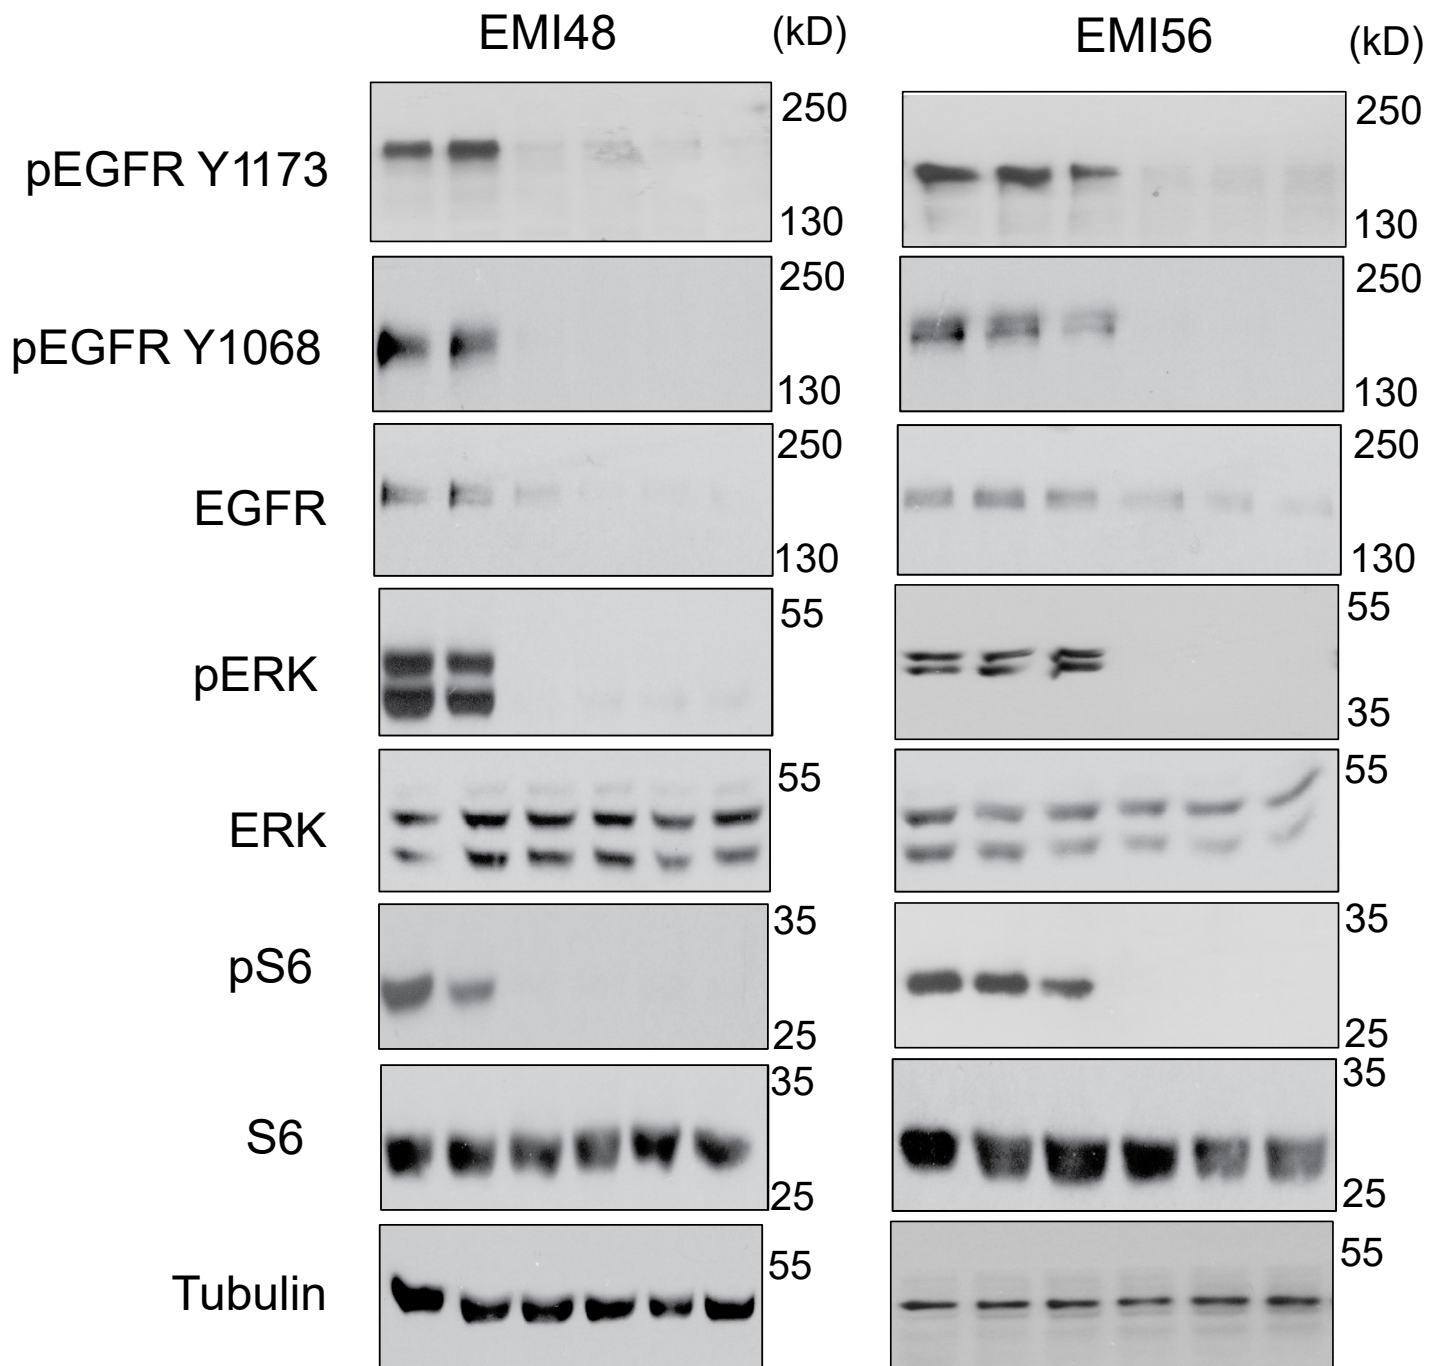

Supplementary Figure 28. Source blot images for Figure 5b and 5c.

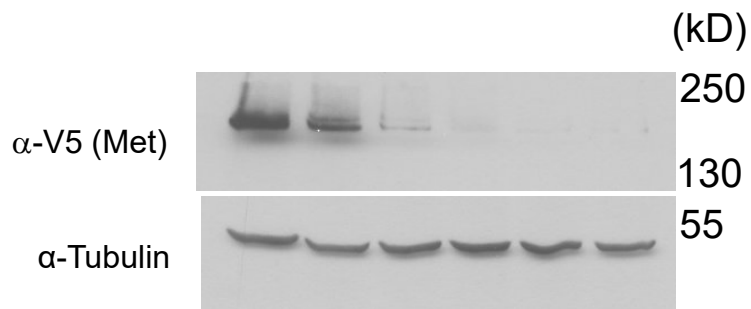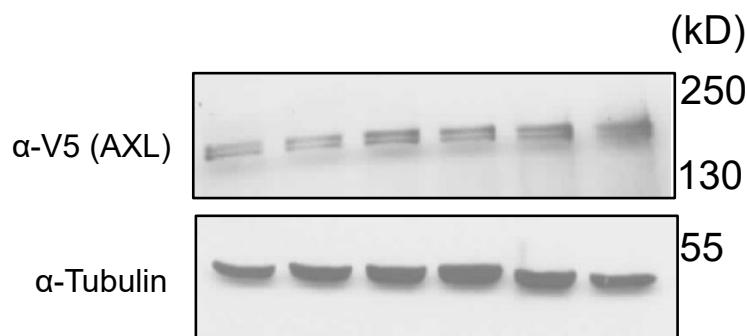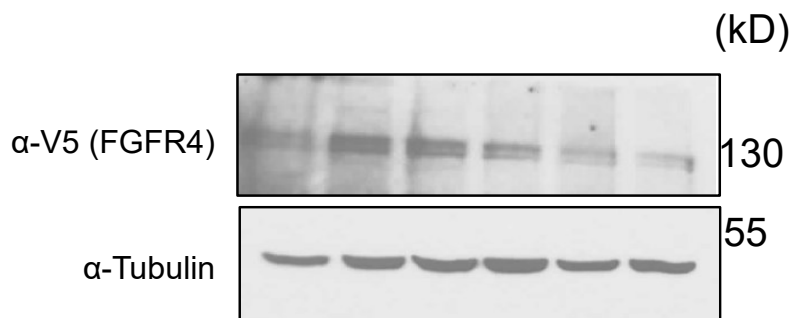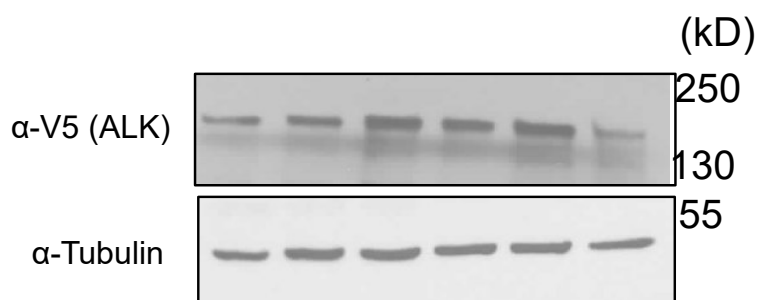

**Supplementary Figure 29.** Source blot images for Supplementary Figure 3 and 4..

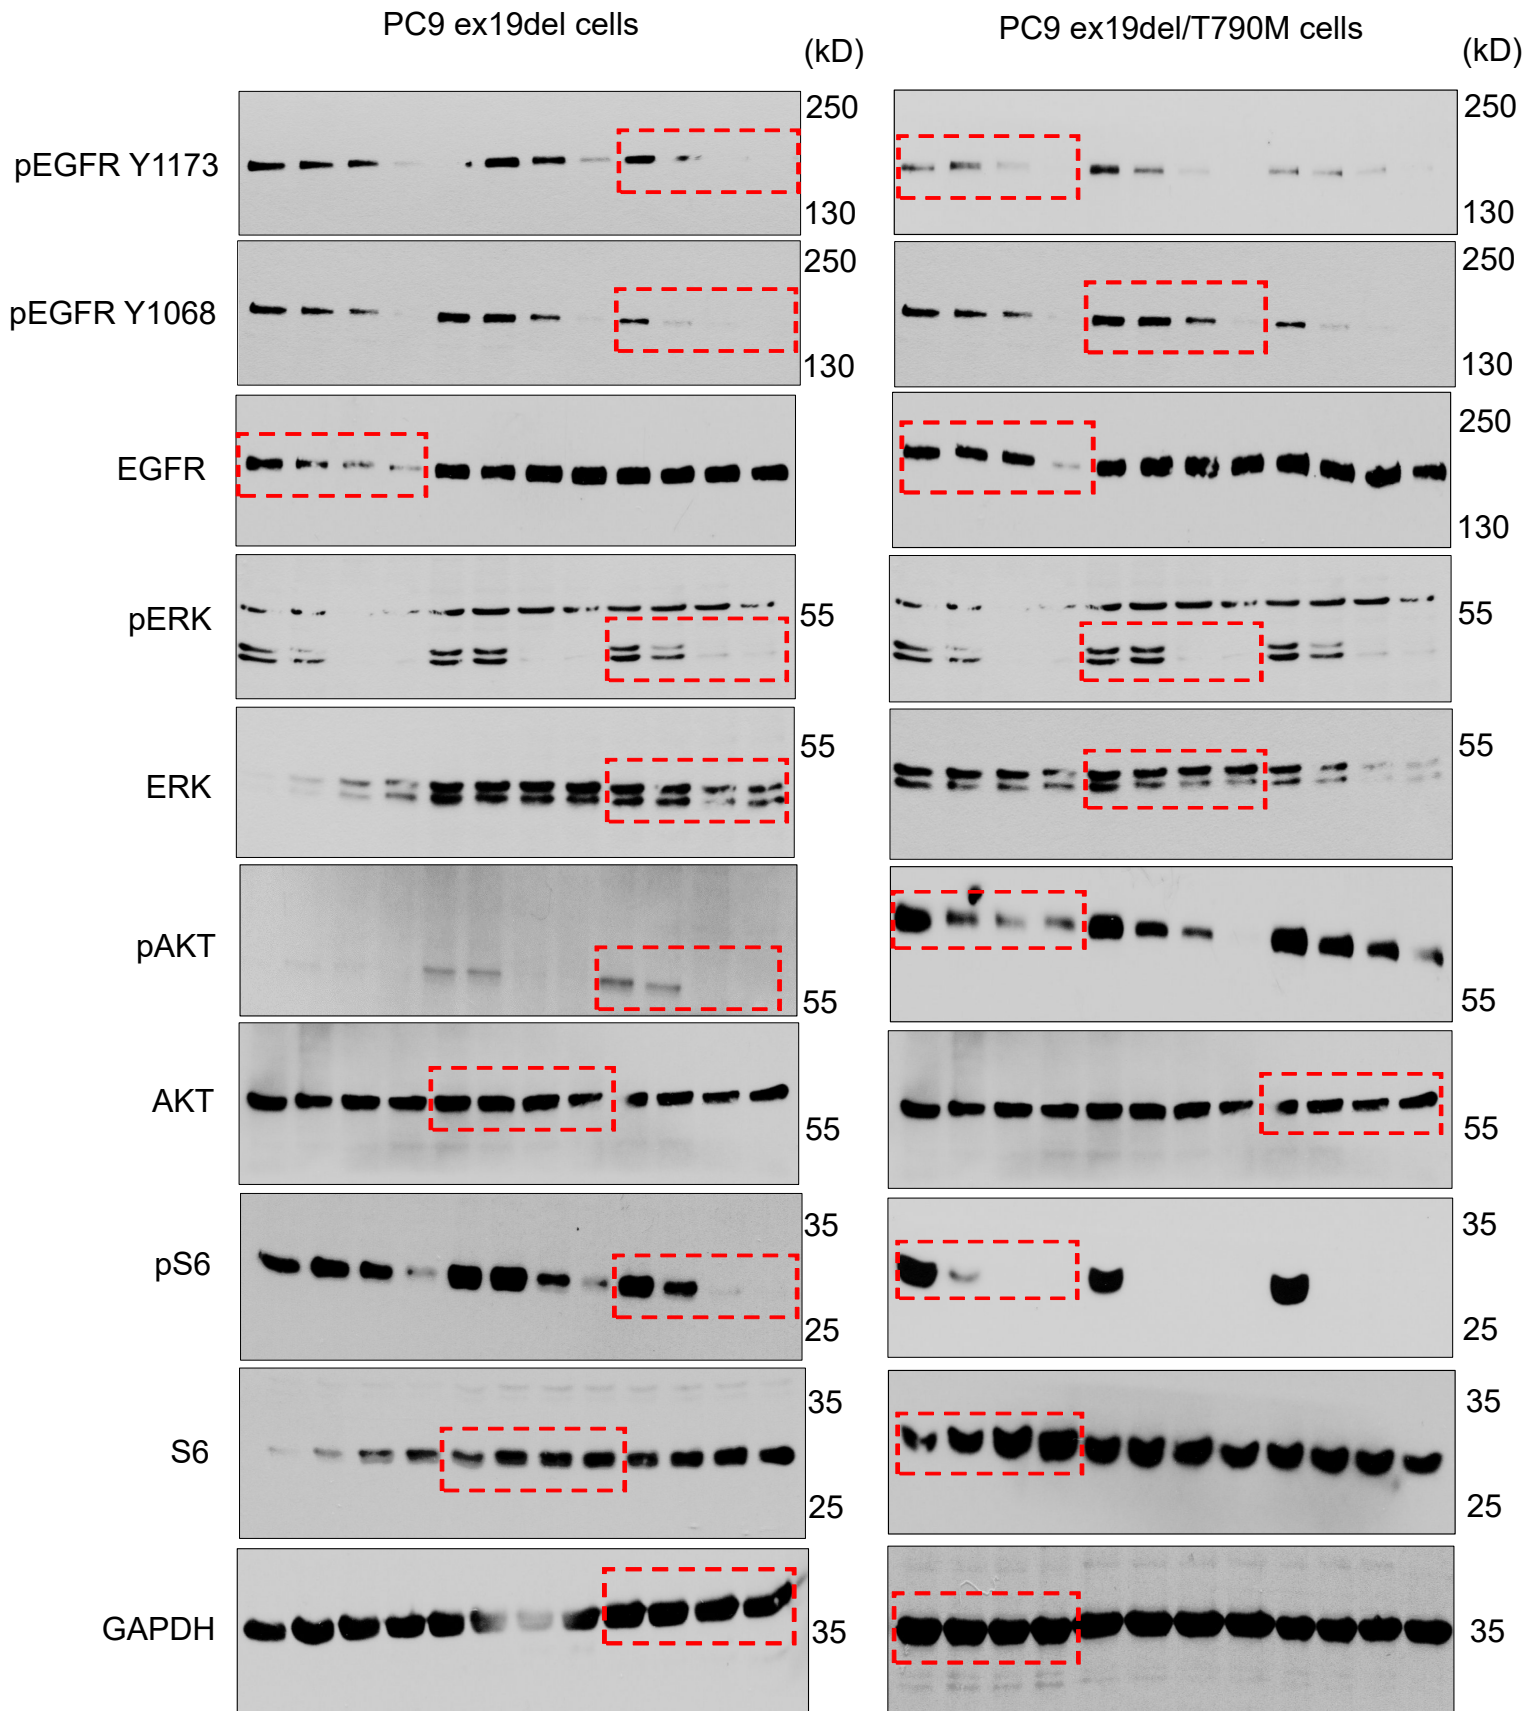

**Supplementary Figure 30.** Source blot images for Supplementary Figure 14a.

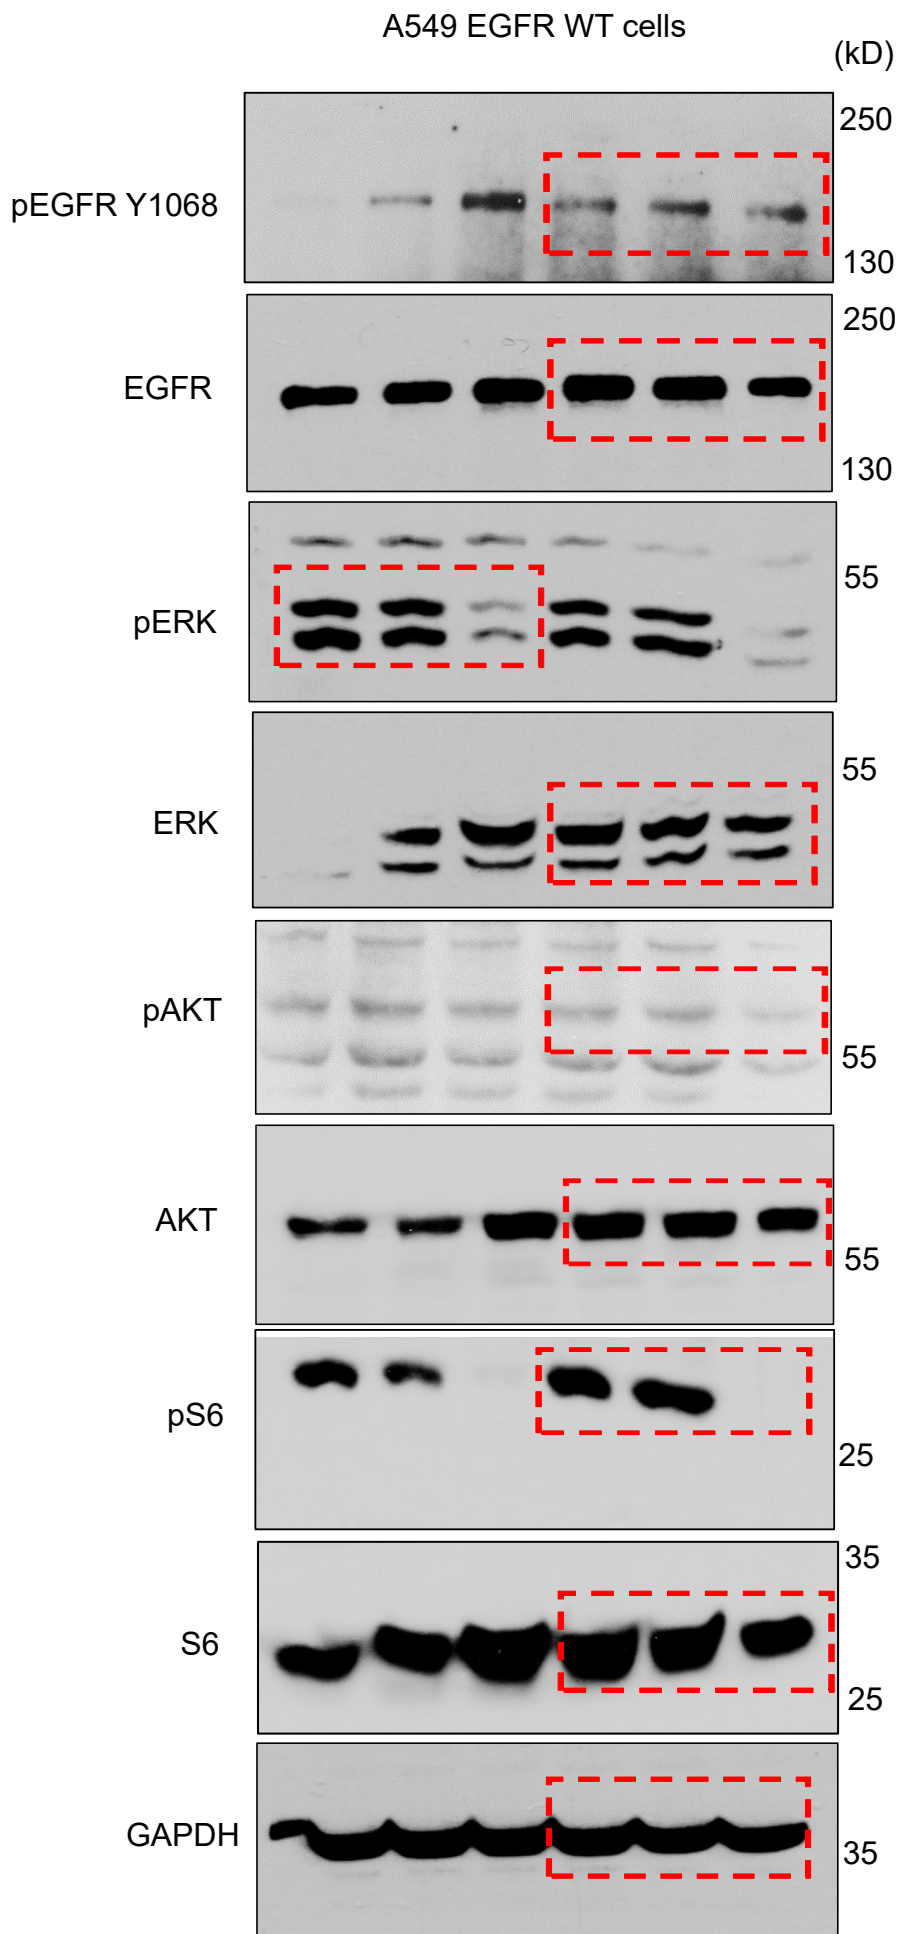

**Supplementary Figure 31.** Source blot images for Supplementary Figure 14b.

PC9 EGFR ex19del/T790M/C797S cells

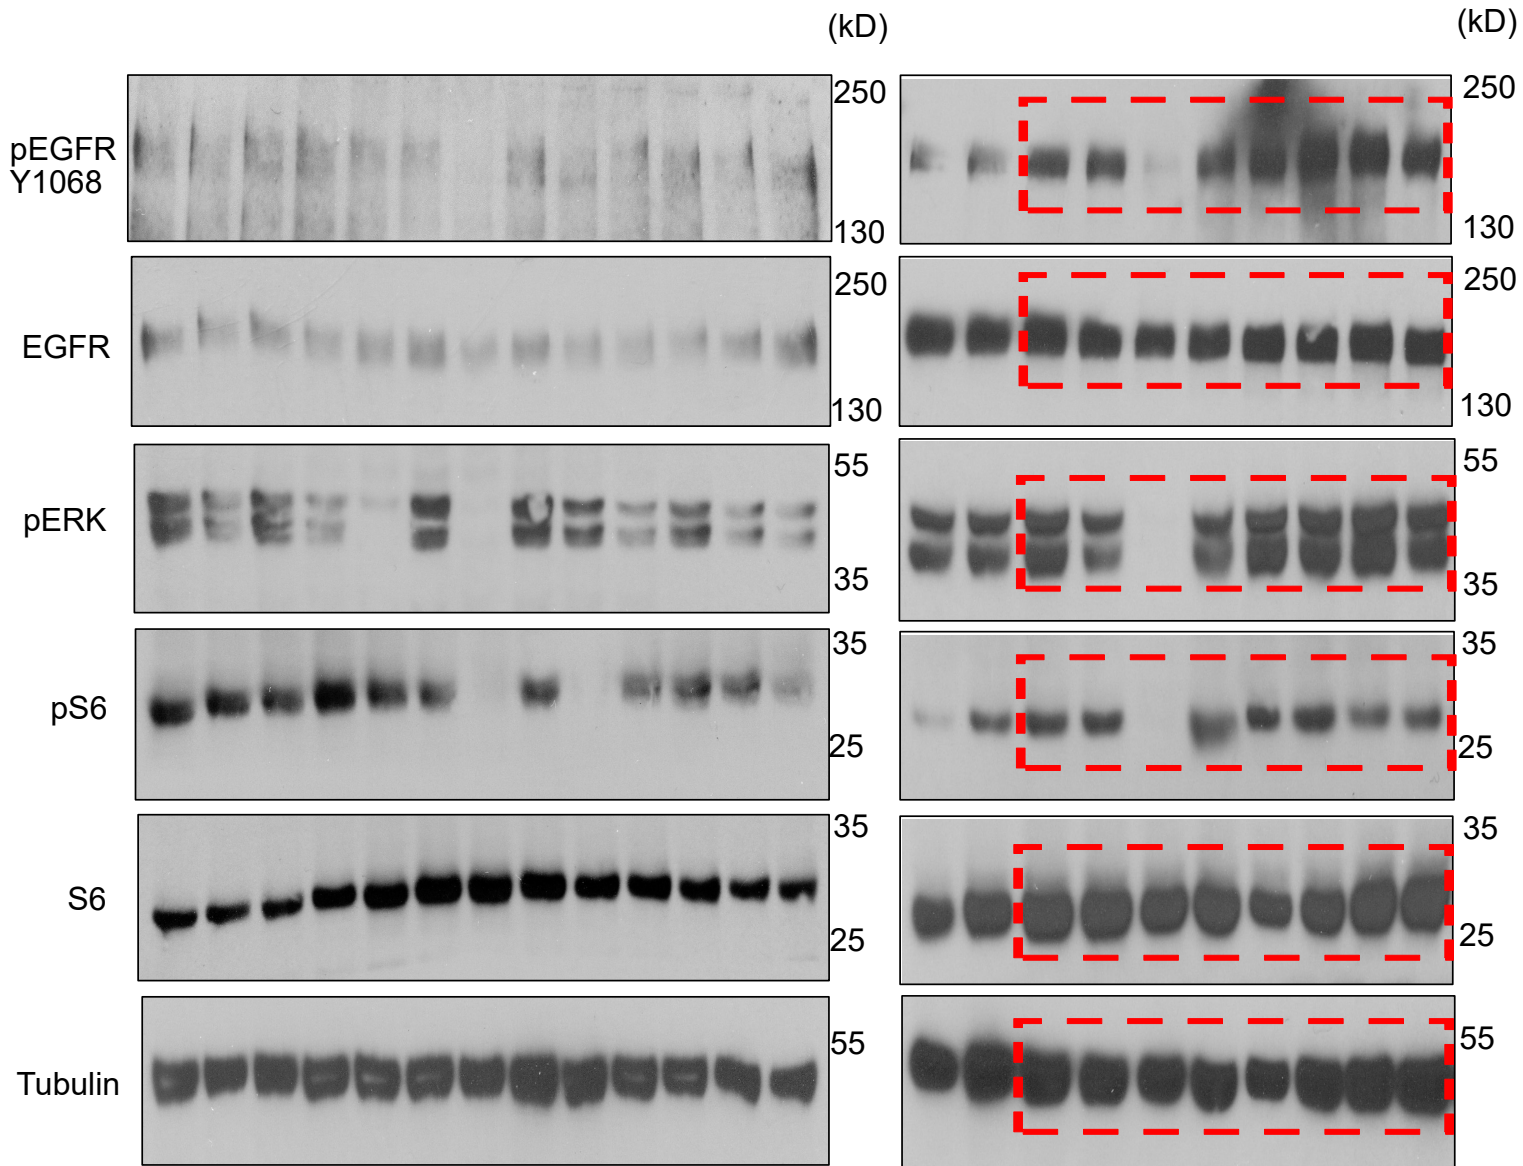

**Supplementary Figure 32.** Source blot images for Supplementary Figure 19.



**Supplementary Table 1. Specificity and reproducibility testing of MaMTH-DS hits, identified in both rounds of screening, against EGFR WT and EGFR L858R/T790M/C797S baits in the presence of Shcl. Samples were run in triplicate (n=3).**

| Compound.Source     | Compound.ID             | WT                           |                              |                              |                 |                 |             | C797S                        |                              |                              |                 |                 |             | WT>50% Inhibition | C797S>50% Inhibition | p-Value     | Fold.WT.C797S |
|---------------------|-------------------------|------------------------------|------------------------------|------------------------------|-----------------|-----------------|-------------|------------------------------|------------------------------|------------------------------|-----------------|-----------------|-------------|-------------------|----------------------|-------------|---------------|
|                     |                         | Luciferase Activity1.Percent | Luciferase Activity2.Percent | Luciferase Activity3.Percent | Average.Percent | Std.Dev.Percent | %CV.Percent | Luciferase Activity1.Percent | Luciferase Activity2.Percent | Luciferase Activity3.Percent | Average.Percent | Std.Dev.Percent | %CV.Percent |                   |                      |             |               |
| OICR TKI Collection | PKC-412, CGP412548      | 96.7                         | 141.4                        | 149.8                        | 129.3           | 28.5            | 22.1        | 7.9                          | 13.1                         | 10.4                         | 10.5            | 2.6             | 24.9        | NO                | YES                  | 0.017991867 | 12.3          |
| Chembridge Diverset | 5213777                 | 118                          | 70.3                         | 127.5                        | 105.3           | 30.6            | 29.1        | 31.9                         | 15.3                         | 36.1                         | 27.8            | 11              | 39.7        | NO                | YES                  | 0.036213511 | 3.8           |
| OICR TKI Collection | {5Z}-7-Oxozeaenol       | 85.8                         | 70.9                         | 83.9                         | 80.2            | 8.1             | 10.1        | 17.7                         | 17.6                         | 19.7                         | 18.3            | 1.2             | 6.6         | NO                | YES                  | 0.004903998 | 4.4           |
| OICR TKI Collection | CGP-74514A hydrate      | 57.8                         | 58.2                         | 56.4                         | 57.5            | 0.9             | 1.6         | 16.5                         | 16.7                         | 15.8                         | 16.3            | 0.5             | 2.9         | NO                | YES                  | 7.30E-06    | 3.5           |
| OICR TKI Collection | AZD 7762, AZD-7762      | 47.1                         | 61.7                         | 60.4                         | 56.4            | 8.1             | 14.3        | 17.3                         | 15.4                         | 14.7                         | 15.8            | 1.4             | 8.6         | NO                | YES                  | 0.011228412 | 3.6           |
| Maybridge HitFinder | BR000865C               | 24.4                         | 25.2                         | 25.2                         | 24.9            | 0.5             | 1.9         | 5.7                          | 6.4                          | 6.4                          | 6.2             | 0.4             | 6.9         | YES               | YES                  | 9.30E-07    | 4             |
| Maybridge HitFinder | SPB018515C              | 18.4                         | 30                           | 25.2                         | 24.5            | 5.9             | 23.8        | 5.6                          | 7.5                          | 4.2                          | 5.8             | 1.6             | 28.1        | YES               | YES                  | 0.024156361 | 4.3           |
| Maybridge HitFinder | SEW063795C              | 21.8                         | 22.4                         | 25.7                         | 23.3            | 2.1             | 8.9         | 14                           | 18.9                         | 18.3                         | 17.1            | 2.6             | 15.5        | YES               | YES                  | 0.035165788 | 1.4           |
| Chembridge Diverset | 5304079                 | 24.4                         | 18.4                         | 21.6                         | 21.5            | 3               | 13.9        | 13.9                         | 13.8                         | 7.4                          | 11.7            | 3.7             | 31.8        | YES               | YES                  | 0.025512837 | 1.8           |
| OICR TKI Collection | Hesperadin              | 12.9                         | 25                           | 21.9                         | 19.9            | 6.3             | 31.7        | 2.4                          | 7                            | 3.9                          | 4.5             | 2.3             | 52.6        | YES               | YES                  | 0.038481202 | 4.5           |
| Maybridge HitFinder | BTB089285C              | 15.3                         | 18.7                         | 17.8                         | 17.3            | 1.8             | 10.4        | 4.8                          | 5.9                          | 5.3                          | 5.3             | 0.5             | 9.9         | YES               | YES                  | 0.004433972 | 3.2           |
| Chembridge Diverset | 5106405                 | 12.5                         | 18.3                         | 16.8                         | 15.8            | 3               | 18.8        | 1.9                          | 4                            | 2.3                          | 2.7             | 1.1             | 41.6        | YES               | YES                  | 0.009345886 | 5.8           |
| Maybridge HitFinder | 5149195C                | 16.7                         | 11.7                         | 12.8                         | 13.7            | 2.7             | 19.4        | 2.7                          | 1.7                          | 4.3                          | 2.9             | 1.3             | 44.9        | YES               | YES                  | 0.008764106 | 4.8           |
| OICR TKI Collection | IRAK4 Inhibitor         | 14.3                         | 11.3                         | 9                            | 11.5            | 2.7             | 23.3        | 4.9                          | 4.1                          | 4.9                          | 4.6             | 0.5             | 9.8         | YES               | YES                  | 0.043699193 | 2.5           |
| OICR TKI Collection | PF-3758309, PF-02341448 | 6.7                          | 9.8                          | 6.4                          | 7.6             | 1.9             | 24.4        | 1                            | 0.7                          | 1.1                          | 0.9             | 0.2             | 25.2        | YES               | YES                  | 0.023346445 | 8.1           |
| Chembridge Diverset | 5357830                 | 8.5                          | 5.4                          | 4.6                          | 6.2             | 2               | 33.1        | 1.2                          | 0.8                          | 0.9                          | 0.9             | 0.2             | 22          | YES               | YES                  | 0.046079898 | 6.6           |
| Chembridge Diverset | 5274945                 | 4.6                          | 4.7                          | 3.8                          | 4.4             | 0.5             | 12          | 0.4                          | 0.2                          | 0.5                          | 0.4             | 0.1             | 33.5        | YES               | YES                  | 0.004005023 | 12            |
| Maybridge HitFinder | KM081605C               | 5.4                          | 4                            | 2.8                          | 4.1             | 1.3             | 32          | 1                            | 0.4                          | 0.4                          | 0.6             | 0.3             | 54          | YES               | YES                  | 0.037344862 | 6.6           |
| OICR TKI Collection | Staurosporine           | 2.7                          | 1.9                          | 2.2                          | 2.3             | 0.4             | 19.6        | 0.8                          | 0.2                          | 0.4                          | 0.5             | 0.3             | 71.5        | YES               | YES                  | 0.006113406 | 5             |
| Chembridge Diverset | 5238658                 | 1.1                          | 0.7                          | 0.9                          | 0.9             | 0.2             | 26.7        | 0.3                          | 0.1                          | 0.2                          | 0.2             | 0.1             | 56.1        | YES               | YES                  | 0.022392801 | 4.4           |
| OICR TKI Collection | Compound 71             | 3.7                          | 9                            | 6.8                          | 6.5             | 2.7             | 40.9        | 1                            | 0.2                          | 0.5                          | 0.4             | 0.5             | 74.7        | YES               | YES                  | 0.057112926 | 12.4          |
| OICR TKI Collection | PIK-75 hydrochloride    | 4.5                          | 8.3                          | 3.7                          | 5.5             | 2.5             | 45.2        | 0.6                          | 0.3                          | 0.1                          | 0.3             | 0.2             | 65.6        | YES               | YES                  | 0.068205877 | 16.3          |
| OICR TKI Collection | A-443654, A-654         | 12                           | 5.6                          | 4.3                          | 7.3             | 4.1             | 56.7        | 0.3                          | 0.3                          | 0.2                          | 0.3             | 0.1             | 25.9        | YES               | YES                  | 0.098676818 | 26.6          |
| Maybridge HitFinder | CD038625C               | 6.4                          | 2.9                          | 6.2                          | 5.2             | 2               | 38.5        | 2.4                          | 1.5                          | 3.2                          | 2.4             | 0.8             | 35.3        | YES               | YES                  | 0.120873261 | 2.2           |
| Chembridge Diverset | 5109882                 | 17.2                         | 14                           | 13.1                         | 14.8            | 2.2             | 14.6        | 12.5                         | 10.7                         | 12.4                         | 11.9            | 1               | 8.5         | YES               | YES                  | 0.1303195   | 1.2           |
| Maybridge HitFinder | JA001135C               | 2.3                          | 1.9                          | 6                            | 3.4             | 2.3             | 66.5        | 0.5                          | 0.3                          | 0.3                          | 0.4             | 0.1             | 32.1        | YES               | YES                  | 0.146340884 | 8.9           |
| OICR TKI Collection | Alvociclib, HMR-1733    | 2.7                          | 2.2                          | 8.4                          | 4.4             | 3.4             | 77.9        | 0.3                          | 0.2                          | 0.5                          | 0.3             | 0.2             | 55.4        | YES               | YES                  | 0.175813511 | 13.1          |
| OICR TKI Collection | Dinaciclib, MK-7956     | 4.2                          | 13                           | 2.2                          | 6.5             | 5.7             | 88.4        | 0.3                          | 0.3                          | 0.3                          | 0               | 7.5             | YES         | YES               | 0.203901998          | 20          |               |
| Chembridge Diverset | 5792598                 | 79                           | 96                           | 77.7                         | 84.2            | 10.2            | 12.2        | 81.5                         | 138.6                        | 124.5                        | 114.8           | 29.8            | 25.9        | NO                | NO                   | 0.209695268 | 0.7           |
| Chembridge Diverset | 5333931                 | 43.6                         | 47.2                         | 46.1                         | 45.6            | 1.8             | 3.9         | 45.9                         | 38.6                         | 41.5                         | 42              | 3.7             | 8.7         | YES               | YES                  | 0.221411804 | 1.1           |
| OICR TKI Collection | PHA-767491 hydrate      | 11.5                         | 12                           | 10.9                         | 11.5            | 0.5             | 4.6         | 10.8                         | 16.7                         | 16.1                         | 14.5            | 3.2             | 22.3        | YES               | YES                  | 0.239198175 | 0.8           |
| OICR TKI Collection | LY-2606368              | 23.67                        | 38.64                        | 37.98                        | 33.43           | 8.46            | 25.3        | 38.67                        | 39.01                        | 37.03                        | 38.24           | 1.06            | 2.77        | YES               | YES                  | 0.429149913 | 0.9           |
| Maybridge HitFinder | SEW025155C              | 8.5                          | 5                            | 6.4                          | 6.7             | 1.8             | 26.5        | 7.4                          | 5.2                          | 6.6                          | 6.4             | 1.1             | 17.4        | YES               | YES                  | 0.830386676 | 1             |
| Chembridge Diverset | 5270140                 | 14                           | 3.8                          | 7                            | 8.3             | 5.2             | 62.7        | 9.4                          | 4.3                          | 12.2                         | 8.6             | 4               | 46.5        | YES               | YES                  | 0.931181228 | 1             |

**Supplementary Table 2. Inhibition of oncogenic EGFR mutants by Midostaurin and Gilteritinib**

| <b>Enzyme (IC<sub>50</sub>, nM)</b>                                                                                                                               | <b>Midostaurin</b> | <b>Gilteritinib</b> |
|-------------------------------------------------------------------------------------------------------------------------------------------------------------------|--------------------|---------------------|
| EGFR WT                                                                                                                                                           | > 10,000           | 450                 |
| EGFR L858R                                                                                                                                                        | 545.6              | 358.5               |
| EGFR ex19del                                                                                                                                                      | 616.5              | 257.7               |
| EGFR L858R/T790M                                                                                                                                                  | 15.2               | 179.1               |
| EGFR ex19del/T790M                                                                                                                                                | 33.6               | 92.2                |
| EGFR L858R/T790M/C797S                                                                                                                                            | 29.1               | 58.9                |
| EGFR ex19del/T790M/C797S                                                                                                                                          | 5.2                | 2.45                |
|                                                                                                                                                                   |                    |                     |
| IC <sub>50</sub> : 50% inhibition concentration. The IC <sub>50</sub> was calculated from data collected at concentrations ranging from 0.05 nM to 10 μM (n = 2). |                    |                     |

## **Supplementary Datasets**

**Supplementary Dataset 1:** Collection of compounds used in MaMTH-DS pilot screening.

**Supplementary Dataset 2:** Results of MaMTH-DS screening of EGFR L858R/T790M/C797S in the presence of Shcl (Round 1). A total of 2960 compounds were tested in singlicate (n=1). DMSO and AZD9291 controls were tested at n=16.

**Supplementary Dataset 3:** Results of MaMTH-DS screening of EGFR L858R/T790M/C797S in the presence of Shcl (Round 2). A total of 2960 compounds were tested in singlicate (n=1). DMSO and AZD9291 controls were tested at n=16.

**Supplementary Note 1. MaMTH-DS bait and prey vector sequences and maps**  
**A1160 MaMTH 'bait' vector map and sequence**

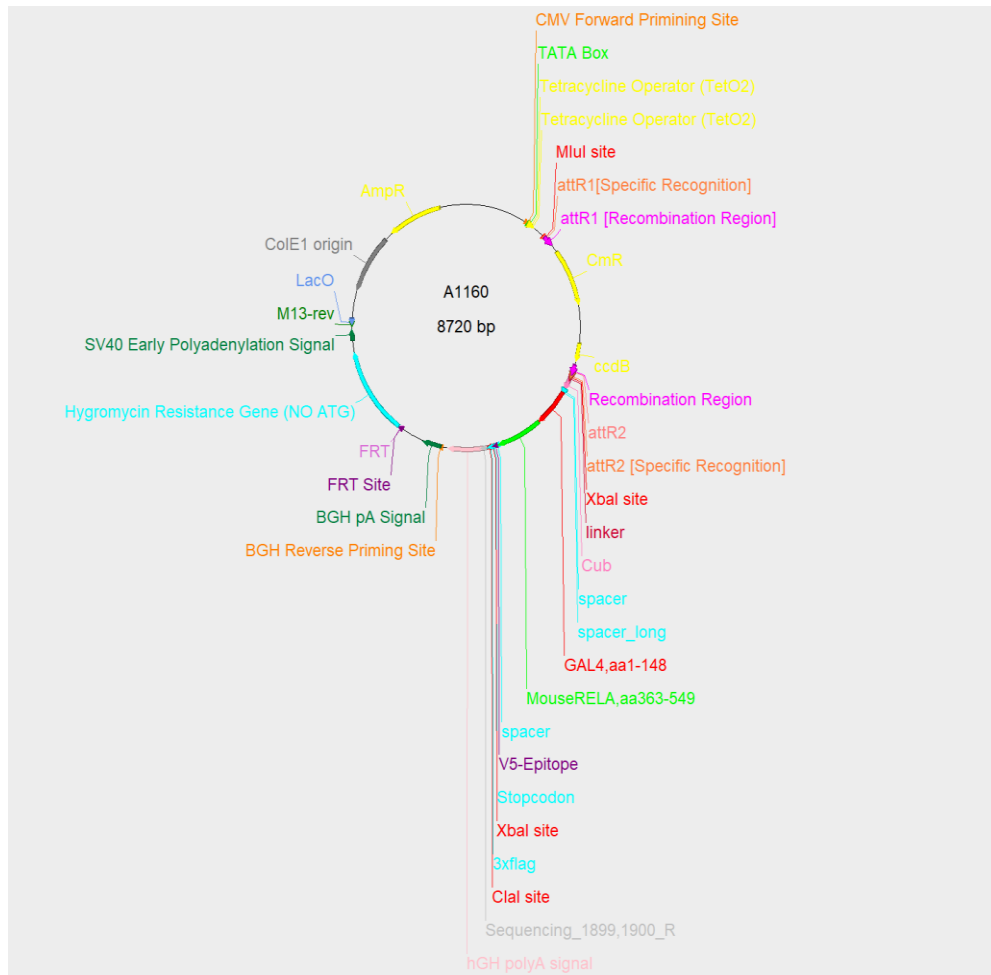

GACGGATCGGGAGATCTCCCGATCCCCTATGGTGCACCTCTCAGTACAATCTGCTCTGATGCCGCATA  
 GTTAAGCCAGTATCTGCTCCCTGCTTGTGTGTTGGAGGTCGCTGAGTAGTGC GCGAGCAAATTTAA  
 GCTACAACAAGGCAAGGCTTGACCGACAATTGCATGAAGAATCTGCTTAGGGTTAGGCGTTTTGCGC  
 TGCTTCGCGATGTACGGGCCAGATATACGCGTTGACATTGATTATTGACTAGTTATTAATAGTAATCA  
 ATTACGGGGTCATTAGTTCATAGCCCATATATGGAGTTCGCGGTTACATAACTTACGGTAAATGGCCC  
 GCCTGGCTGACCGCCCAACGACCCCGCCATTGACGTCAATAATGACGTATGTTCCCATAGTAAC  
 GCCAATAGGGACTTTCCATTGACGTCAATGGGTGGAGTATTTACGGTAAACTGCCCACTTGGCAGTA  
 CATCAAGTGTATCATATGCCAAGTACGCCCCCTATTGACGTCAATGACGGTAAATGGCCCGCCTGGC  
 ATTATGCCCAGTACATGACCTTATGGGACTTTCTACTTGGCAGTACATCTACGTATTAGTCATCGCT  
 ATTACCATGGTGTATGCGGTTTTGGCAGTACATCAATGGGCGTGGATAGCGGTTTTGACTCACGGGGAT  
 TTCCAAGTCTCCACCCCAATTGACGTCAATGGGAGTTTTGTTTTGGCACCAAAATCAACGGGACTTTCCA  
 AAATGTCGTAACAACCTCCGCCCAATTGACGCAAATGGGCGGTAGGCGTGTACGGTGGGAGGTCTAT  
 ATAAGCAGAGCTCTCCCTATCAGTGATAGAGATCTCCCTATCAGTGATAGAGATCGTCGACGAGCTC  
 GTTTAGTGAACCGTCAGATCGCTGGAGACGCCATCCACGCTGTTTTGACCTCCATAGAAGACACCG  
 GGACCGATCCAGCCTCCGGACTCTAGCGTTTTAACTTAAGCTTGGTACCGAGCTCGGATCCACTAGT  
 CCAGTGTGGTGGAAATTCTGCAGATTTGATCTGGTACCACGCGTACAAGTTTGTACAAAAAAGCTGAA  
 CGAGAAACGTAATAATGATATAAATATCAATATATTAATTAGATTTTGCATAAAAAACAGACTACATAAT  
 ACTGTAATAACACAACATATCCAGTCACTATGGCGGCCGATTAGGCACCCAGGCTTTACACTTTAT  
 GCTCCGGCTCGTATAATGTGTGGATTTTGGAGTTAGGATCCGTCGAGATTTTCAGGAGCTAAGGAAG

CTAAAATGGAGAAAAAATCACTGGATATACCACCGTTGATATATCCCAATGGCATCGTAAAGAACAT  
TTTGAGGCATTTTCAGTCAGTTGCTCAATGTACCTATAACCAGACCGTTCAGCTGGATATTACGGCCTT  
TTTAAAGACCGTAAAGAAAAATAAGCACAAAGTTTTATCCGGCCTTTATTACATTCTTGCCCGCCTGA  
TGAATGCTCATCCGGAATCCCGTATGGCAATGAAAGACGGTGAGCTGGTGATATGGGATAGTGTTCA  
CCCTTGTTACACCGTTTTCCATGAGCAAACGTTTTCATCGCTCTGGAGTGAATACCACGACG  
ATTTCCGGCAGTTTCTACACATATATTCGCAAGATGTGGCGTGTTACGGTGAAAACCTGGCCTATTTT  
CCTAAAGGGTTTTATTGAGAATATGTTTTTCGTCTCAGCCAATCCCTGGGTGAGTTTCACCAGTTTTGA  
TTTTAACGTGGCCAATATGGACAACCTTCTTCGCCCCCGTTTTACCATGGGCAAATATTATACGCAAG  
GCGACAAGGTGCTGATGCCGCTGGCGATTGAGTTTCATCATGCCGTTTTGTGATGGCTTCCATGTCG  
GCAGAATGCTTAATGAATTACAACAGTACTGCGATGAGTGGCAGGGCGGGGCGTAAAGATCTGGAT  
CCGGCTTACTAAAAGCCAGATAACAGTATGCGTATTTGCGCGCTGATTTTTGCGGTATAAGAATATAT  
ACTGATATGTATACCCGAAGTATGTCAAAAAGAGGTATGCTATGAAGCAGCGTATTACAGTGACAGTT  
GACAGCGACAGCTATCAGTTGCTCAAGGCATATATGATGTCAATATCTCCGGTCTGGTAAGCACAAC  
CATGCAGAATGAAGCCCGTCGTCTGCGTGCCGAACGCTGGAAAGCGGAAAATCAGGAAGGGATGG  
CTGAGGTGCGCCCGTTTTATTGAAATGAACGGCTCTTTTGTGACGAGAACAGGGGCTGGTGAAATG  
CAGTTTAAAGTTTACACCTATAAAAGAGAGAGCCGTTATCGTCTGTTTGTGGATGTACAGAGTGATAT  
TATTGACACGCCCGGGCGACGGATGGTGATCCCCCTGGCCAGTGCACGTCTGCTGTGATGATAAAGT  
CTCCCGTGAACTTTACCCGGTGGTGATATCGGGGATGAAAGCTGGCGCATGATGACCACCGATAT  
GGCCAGTGTGCCGGTCTCCGTTATCGGGGAAGAAGTGGCTGATCTCAGCCACCGCGAAAATGACAT  
CAAAAACGCCATTAACCTGATGTTCTGGGGAATATAAATGTCAGGCTCCCTTATACACAGCCAGTCTG  
CAGGTGCGACCATAGTACTGGATATGTTGTGTTTTACAGTATTATGTAGTCTGTTTTTTATGCAAAATC  
TAATTTAATATATTGATATTTATATCATTTTACGTTTTCTCGTTACAGTTTTCTTGACAAAAGTGGTTGATT  
CTAGAGGTGGCGGTGGCTCTGGAGGTGGTGGGTCatgtcgggggggatccctccagatcaacaagattgatcttggc  
ggaagcagctagaagacggtagaacgctgtctgattacaacattcagaaggatccaccttACATCTTGTGCTAAGGCTAAGAG  
GTGGTATGCACAGATCAgcttgtcgacggtatcgataagcttgATGAAGCTACTGTCTTCTATCGAACAAGCATGC  
GATATTTGCCGACTTAAAAAGCTCAAGTGTCCAAAGAAAAACCGAAGTGCGCCAAGTGTCTGAAGA  
ACAACCTGGGAGTGTGCTACTCTCCCAAAACCAAAAGGTCTCCGCTGACTAGGGCACATCTGACAGA  
AGTGAATCAAGGCTAGAAAGACTGGAACAGCTATTTCTACTGATTTTTCTCGAGAAGACCTTGACA  
TGATTTTAAAATGGATTCTTTACAGGATATAAAAGCATTGTTAACAGGATTATTTGTACAAGATAATG  
TGAATAAAGATGCCGTCACAGATAGATTGGCTTCAGTGGAGACTGATATGCCTCTAACATTGAGACA  
GCATAGAATAAGTGCACATCATCATCGGAAGAGAGTAGTAACAAAGGTCAAAGACAGTTGACTGTA  
TCGATTTTTTCCCCATGCTGTTACCATCAGGGCAGATCTCAAACCAGGCCCTGGCCTTAGCACCGT  
CCTCTGCCCCAGTCTTGCCAGACCATGGTCCCTTCTCAGCCATGGTACCTCTGGCTCAGCCCC  
CAGCTCCTGCCCCAGTTCTAACCCCGGGTCTCCCCAGTCCCTGTCTGCACCTGTTCCAAAGAGCA  
CCCAGGCTGGGGAAGGCACGCTGTGGAAGCCCTGCTGCACCTGCAGTTTGATGCTGATGAAGACT  
TGGGGGCCCTTGCTTGGAACAGCACAGACCCAGGAGTGTTACACAGACCTGGCATCTGTGGACAACCT  
CAGAGTTTACAGCAGCTCCTGAACCAGGGTGTGTCCATGTCTCACTCCACAGCTGAGCCCATGCTGAT  
GGAGTACCCTGAAGCTATAACTCGCCTGGTGACAGGGTCCCAGAGGCCCCCTGACCCAGCTCCCAC  
ACCCCTGGGGACCTCGGGGCTTCCCAATGGTCTCTCCGGAGATGAAGACTTCTCCTCCATTGCGGA  
CATGGACTTCTCTGCTCTTTTGGATCAGATCAGCTCCgagaggtggcgaGGTAAGCCTATCCCTAACCTT  
CTCCTCGGTCTCGATTCTACGTAATCTAGAGACTACAAAGACCATGACGGTGATTATAAAGATCATGA  
CATCGATTACAAGGATGACGATGACAAGTAAGGATCCCGGGTGGCATCCCTGTGACCCCTCCCCAG  
TGCCTCTCCTGGCCCTGGAAGTTGCCACTCCAGTGCCCACCAGCCTTGTCTAATAAAAATTAAGTTG  
CATCATTTTGTCTGACTAGGTGTCTTCTATAAATATTATGGGGTGGAGGGGGGTGGTATGGAGCAAG  
GGGCAAGTTGGGAAGACAACCTGTAGGGCCTGCGGGGTCTATTGGGAACCAAGCTGGAGTGCAGT  
GGCACAATCTTGCTCACTGCAATCTCCGCCTCCTGGGTTCAAGCGATTCTCCTGCCTCAGCCTCCC  
GAGTTGTTGGGATTCCAGGCATGCATGACCAGGCTCAGCTAATTTTTGTTTTTTGGTAGAGACGGG  
GTTTACCATATTGGCCAGGCTGGTCTCCAACCTCTAATCTCAGGTGATCTACCCACCTTGGCCTCC  
CAAAATGCTGGGATTACAGGCGTGAACCACTGCTCCCTTCCCTGTCTTCTGATTTTAAAATAACTAT  
ACCAGATCCAGCACAGTGGCGGCCGCTCGAGTCTAGAGGGCCCGTTTTAAACCCGCTGATCAGCCTC  
GACTGTGCCCTTCTAGTTGCCAGCCATCTGTTGTTTGGCCCTCCCCCGTGCCTTCTTGACCCTGGAA  
GGTGCCACTCCCACTGTCTTTTCTAATAAAAATGAGGAAATTGCATCGCATTGTCTGAGTAGGTGTCA

TTCTATTCTGGGGGGTGGGGTGGGGCAGGACAGCAAGGGGGAGGATTGGGAAGACAATAGCAGGC  
ATGCTGGGGATGCGGTGGGCTCTATGGCTTCTGAGGCGGAAAGAACCAGCTGGGGCTCTAGGGGG  
TATCCCCACGCGCCCTGTAGCGGCGCATTAAAGCGGCGGGTGTGGTGGTTACGCGCAGCGTGAC  
CGCTACACTTGCCAGCGCCCTAGCGCCCGCTCCTTTTCGCTTTCTTCCCTTCCCTTTCTCGCCACGTT  
GCCGGCTTTCCCGTCAAGCTCTAAATCGGGGGCTCCCTTTAGGGTTCCGATTTAGTGCTTTACGGC  
ACCTCGACCCCAAAAACTTGATTAGGGTATGGTTCACGTACCTAGAAGTTCCTATTCCGAAGTTCC  
TATTCTCTAGAAAATAGGAACTTCCCTGGCCAAAAAGCCTGAACTCACCGCGACGTCTGTGAGAG  
AGTTTCTGATCGAAAAGTTCGACAGCGTCTCCGACCTGATGCAGCTCTCGGAGGGGCGAAGAATCTC  
GTGCTTTACGTTTCGATGTAGGAGGGCGTGGATATGTCCTGCGGGTAAATAGCTGCGCCGATGGTT  
TCTACAAAGATCGTTATGTTTATCGGCACCTTGCATCGGCCGCGCTCCCGATTCCGGAAGTGCTTGA  
CATTGGGGAATTCAGCGAGAGCCTGACCTATTGCATCTCCCGCCGTGCACAGGGTGTACGTTGCA  
AGACCTGCCTGAAACCGAACTGCCCGCTGTTCTGCAGCCGGTGCAGGAGGCCATGGATGCGATCG  
CTGCGGCCGATCTTAGCCAGACGAGCGGGTTTCGGCCATTTCGGACCGCAAGGAATCGGTCAATACA  
CTACATGGCGTGATTTTCATATGCGCGATTGCTGATCCCATGTGTATCACTGGCAAACCTGTGATGGA  
CGACACCGTCAGTGCCTCCGTGCGCGAGGCTCTCGATGAGCTGATGCTTTGGGCCGAGGACTGCC  
CCGAAGTCCGGCACCTCGTGCACGCGGATTTTCGGCTCCAACAATGTCTGACGGACAATGGCCGCA  
TAACAGCGGTCATTGACTGGAGCGAGGCGATGTTTCGGGGATTCCCAATACGAGGTCGCCAACATCT  
TCTTCTGGAGGCCGTGGTTGGCTTGTATGGAGCAGCAGACGCGCTACTTCGAGCGGAGGCATCCG  
GAGCTTGCAGGATCGCCGCGGCTCCGGGCGTATATGCTCCGCATTGGTCTTGACCAACTCTATCAG  
AGCTTGGTTGACGGCAATTTTCGATGATGCAGCTTGGGCGCAGGGTTCGATGCGACGCAATCGTCCGA  
TCCGGAGCCGGGACTGTGCGGCGTACACAAATCGCCCGCAGAAGCGCGGCCGTCTGGACCGATGG  
CTGTGTAGAAGTACTCGCCGATAGTGAAACCGACGCCCCAGCACTCGTCCGAGGGGCAAGGAATA  
GCACGTAACGAGATTTTCGATTCCACCGCCGCTTCTATGAAAGTTGGGCTTCGGAATCGTTTTTC  
CGGGACGCCGGCTGGATGATCTCCAGCGCGGGGATCTCATGCTGGAGTTCTTCGCCACCCCAA  
CTTGTTTATTGCAGCTTATAATGGTTACAAATAAAGCAATAGCATCACAAATTTACAAATAAAGCATT  
TTTTTCACTGCATTCTAGTTGTGGTTTGTCCAAACTCATCAATGTATCTTATCATGTCTGTATACCGTC  
GACCTCTAGCTAGAGCTTGGCGTAATCATGGTCATAGCTGTTTCTGTGTGAAATTGTTATCCGCTCA  
CAATCCACACAACATACGAGCCGGAAGCATAAAGTGTAAAGCCTGGGGTGCCTAATGAGTGAGCTA  
ACTCACATTAATTGCGTTGCGCTCACTGCCCGCTTTCCAGTTCGGGAAACCTGTGCTGCCAGCTGCAT  
TAATGAATCGGCCAACGCGCGGGGAGAGGCGGTTTGCATATTGGGCGCTCTTCCGCTTCTCGCTC  
ACTGACTCGCTGCGCTCGGTCGTTTCGGCTGCGGCGAGCGGTATCAGCTCACTCAAAGGCGGTAATA  
CGGTTATCCACAGAATCAGGGGATAACGCAGGAAAGAACATGTGAGCAAAGGCCAGCAAAGGCC  
AGGAACCGTAAAAAGGCCGCGTTGCTGGCGTTTTTTCATAGGCTCCGCCCCCTGACGAGCATCAC  
AAAAATCGACGCTCAAGTCAAGGTTGGCGAAACCCGACAGGACTATAAAGATAACAGGCGTTTTCC  
CCTGGAAGCTCCCTCGTGCCTCTCCTGTTCCGACCCTGCCGTTACCGGATACCTGTCCGCCTTT  
CTCCCTTCGGGAAGCGTGGCGCTTTCTCATAGCTCACGCTGTAGGTATCTCAGTTCGGTGTAGGTGC  
TTCGCTCCAAGCTGGGCTGTGTGCACGAACCCCGTTACGCCGACCCTGCGCTTATCCGGTA  
ACTATCGTCTTGAGTCCAACCCGGTAAGACACGACTTATCGCCACTGGCAGCAGCCACTGGTAACAG  
GATTAGCAGAGCGAGGTATGTAGGCGGTGCTACAGAGTTCTTGAAGTGGTGGCCTAACTACGGCTA  
CACTAGAAGAACAGTATTTGGTATCTGCGCTCTGCTGAAGCCAGTTACCTTCGGAAAAAGAGTTGGT  
AGCTCTTGATCCGGCAAACAACACCGCTGGTAGCGGTGGTTTTTTTTGTTTGAAGCAGCAGATTA  
CGCGCAGAAAAAAGGATCTCAAGAAGATCCTTTGATCTTTTCTACGGGGTCTGACGCTCAGTGGAA  
CGAAAACCTCACGTTAAGGGATTTTGGTTCATGAGATTATCAAAAAGGATCTTACCTAGATCCTTTTAA  
ATTAATAATGAAGTTTTAAATCAATCTAAAGTATATATGAGTAACTTGGTCTGACAGTTACCAATGCT  
TAATCAGTGAGGCACCTATCTCAGCGATCTGTCTATTTTCGTTTCATCCATAGTTGCCTGACTCCCGTC  
GTGTAGATAACTACGATACGGGAGGGCTTACCATCTGGCCCCAGTGCTGCAATGATACCGCGAGAC  
CCACGCTCACCGGCTCCAGATTTATCAGCAATAAACCAGCCAGCCGGAAGGGCCGAGCGCAGAAGT  
GGTCTGCAACTTTATCCGCCTCCATCCAGTCTATTAATTGTTGCCGGGAAGCTAGAGTAAGTAGTTC  
GCCAGTTAATAGTTTGCGCAACGTTGTTGCCATTGCTACAGGCATCGTGGTGTACGCTCGTCGTTT  
GGTATGGCTTCATTAGCTCCGGTTCCCAACGATCAAGGCGAGTTACATGATCCCCCATGTTGTGCA  
AAAAAGCGGTTAGCTCCTTCGGTCCCTCCGATCGTTGTGAGAAGTAAAGTTGGCCGCGAGTGTATCACT  
CATGGTTATGGCAGCACTGCATAATTCTTACTGTATGCCATCCGTAAGATGCTTTTCTGTGACTG

GTGAGTACTCAACCAAGTCATTCTGAGAATAGTGTATGCGGCGACCGAGTTGCTCTTGCCCGGCGTC  
 AATACGGGATAATACCGCGCCACATAGCAGAACTTTAAAAGTGCTCATCATTGGAAAACGTTCTTCG  
 GGGCGAAAACCTCTCAAGGATCTTACCGCTGTTGAGATCCAGTTCGATGTAACCCACTCGTGCACCCA  
 ACTGATCTTCAGCATCTTTTACTTTCCACCAGCGTTTCTGGGTGAGCAAAAACAGGAAGGCAAATGCC  
 GCAAAAAGGGAATAAGGGCGACACGGAAATGTTGAATACTCATACTCTTCCTTTTTCAATATTATTG  
 AAGCATTTATCAGGGTTATTGTCTCATGAGCGGATACATATTTGAATGTATTTAGAAAAATAACAAT  
 AGGGTTCCGCGCACATTTCCCCGAAAAGTGCCACCTGACGTC

### A1245 MaMTH 'prey' vector map and sequence

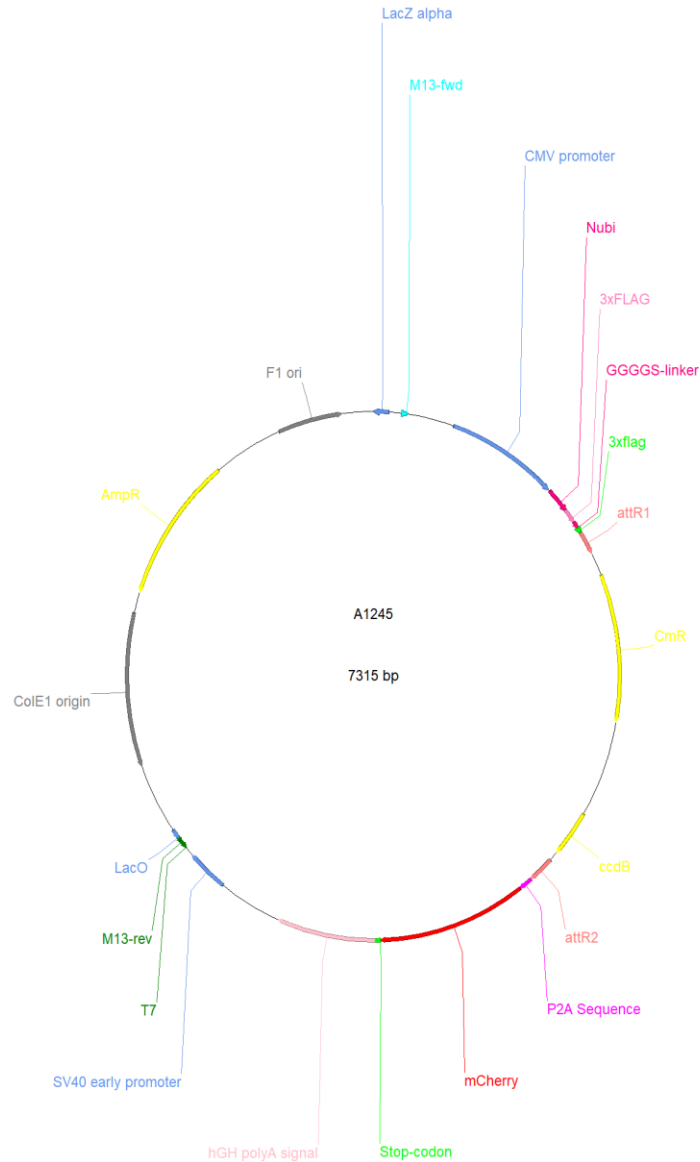

CCCATTTCGCCATTCAGGCTGCGCAACTGTTGGGAAGGGCGATCGGTGCGGGCCTCTTCGCTATTAC  
 GCCAGCTGGCGAAAGGGGGATGTGCTGCAAGGCGATTAAGTTGGGTAACGCCAGGGTTTTCCAGT

CACGACGTTGTAAAACGACGGCCAGTGCCAAGCTGATCTATACATTGAATCAATATTGGCAATTAGC  
CATATTAGTCATTGGTTATATAGCATAAATCAATATTGGCTATTGGCCATTGCATACGTTGTATCTATA  
TCATAATATGTACATTTATATTGGCTCATGTCCAATATGACCGCCATGTTGACATTGATTATTGACTAG  
TTATTAATAGTAATCAATTACGGGGTTCATTAGTTCATAGCCCATATATGGAGTTCGCGTTACATAACT  
TACGGTAAATGGCCCGCCTGGCTGACCGCCCAACGACCCCGCCATTGACGTCAATAATGACGTA  
TGTTCCCATAGTAACGCCAATAGGGACTTTCCATTGACGTCAATGGGTGGAGTATTTACGGTAAACT  
GCCCACTTGGCAGTACATCAAGTGTATCATATGCCAAGTCCGCCCCCTATTGACGTCAATGACGGTA  
AATGGCCCGCCTGGCATTATGCCCAGTACATGACCTTACGGGACTTTCTACTTGGCAGTACATCTA  
CGTATTAGTCATCGCTATTACCATGGTGTATGCGGTTTTGGCAGTACACCAATGGGCGTGGATAGCGG  
TTTGACTCACGGGGATTTCCAAGTCTCCACCCCATTGACGTCAATGGGAGTTTGTGTTTGGCACCAA  
ATCAACGGGACTTTCCAAAATGTCGTAATAACCCCGCCCGTTGACGCAAATGGGCGGTAGGCGTG  
TACGGTGGGAGGTCTATATAAGCAGAGCTCGTTTGTGAACCGTCAGAATTGATCTGGTACCatgcaga  
tttcgcaagacttgaccggtaaaaccataacattggaagttgaatctccgataccatcgacaacgtaagtcgaaaattcaagacaaggaaggt  
atccctgactacaaagaccatgacgggtattataaagatcatgacatcgattacaaggatgacgatgacaagggggcggtgctctggaggtgtg  
gggtccAAGCTTACAAGTTTGTACAAAAAAGCTGAACGAGAAAACGTAAAATGATATAAATATCAATATATT  
AAATTAGATTTTGCATAAAAAACAGACTACATAAATACTGTAAAACACAACATATCCAGTCACTATGgcg  
cgcattaggcaccaccaggCTTTACACTTTATGCTTCCGGCTCGTATAATGTGTGGATTTTGTAGTTAGGATCC  
GTCGAGATTTTTCAGGAGCTAAGGAAGCTAAAATGGAGAAAAAATCACTGGATATACCACCGTTGAT  
ATATCCCAATGGCATCGTAAAGAACATTTTGTAGGCATTTTCAGTCAGTTGCTCAATGTACCTATAACCA  
GACCGTTCAGCTGGATATTACGGCCTTTTTAAAGACCGTAAAGAAAAATAAGCACAAGTTTTATCCGG  
CCTTTATTACATTCTTGCCCGCCTGATGAATGCTCATCCGGAATTCGATGGCAATGAAAGACGGT  
GAGCTGGTGTATGGGATAGTGTTCACCCTTGTACACCGTTTTCCATGAGCAAATGAAACGTTTTCT  
ATCGCTCTGGAGTGAATACCACGACGATTTCCGGCAGTTTTCTACACATATATTGCAAGATGTGGCG  
TGTTACGGTGAACCTGGCCTATTTCCCTAAAGGGTTTATTGAGAATATGTTTTTCGTCTCAGCCAA  
TCCCTGGGTGAGTTTACCAGTTTTGATTTAAACGTGGCCAATATGGACAACCTTCTTCGCCCCGTTT  
TCACCATGGGCAAATATTATACGCAAGGCGACAAGGTGCTGATGCCGCTGGCGATTTCAGGTTTCATCA  
TGCCGTTTGTGATGGCTTCCATGTCGGCAGAATGCTTAATGAATTACAACAGTACTGCGATGAGTGG  
CAGGGCGGGGCGTAAACGCGTGGATCCGGCTTACTAAAAGCCAGATAACAGTATGCGTATTTGCGC  
GCTGATTTTTGCGGTATAAGAATATATACTGATATGTATACCCGAAGTATGTCAAAAAGAGGTATGCT  
ATGAAGCAGCGTATTACAGTGACAGTTGACAGCGACAGCTATCAGTTGCTCAAGGCATATATGATGT  
CAATATCTCCGGTCTGGTAAGCACAACCATGCAGAATGAAGCCCGTCTGCTGCGTGCCGAACGCTG  
GAAAGCGGAAAATCAGGAAGGGATGGCTGAGGTCGCCCGTTTTATTGAAATGAACGGCTCTTTTGC  
TGACGAGAACAGGGGCTGGTGAATGCAGTTTAAAGTTTTACACCTATAAAAGAGAGAGCCGTTATCG  
TCTGTTTTGTGGATGTACAGAGTGTATTTATTGACACGCCCGGGCGACGGATGGTGTATCCCCCTGGC  
CAGTGCACGTCTGCTGTGAGATAAAGTCTCCCGTGAACCTTTACCCGGTGGTGCATATCGGGGATGAA  
AGCTGGCGCATGATGACCACCGATATGGCCAGTGTGCCGGTCTCCGTTATCGGGGAAGAAGTGGCT  
GATCTCAGCCACCGCGAAAATGACATCAAAAACGCCATTaacctgatgtctggggaataTAAATGTCAGGCTC  
CCTTATACACAGCCAGTCTGCAGGTCGACCATAGTACTGGATATGTTGTGTTTTACAGCATTATGTA  
GTCTGTTTTTATGCAAAATCTAATTTAATATATTGATTTTATATCATTTTACGTTTCTGTTTCAGCTTT  
CTTGTACAAAGTGGTGGGAAGCGGAGCTACTAACTTCAGCCTGCTGAAGCAGGCTGGAGACGTGGA  
GGAGAACCCTGGACCTATGGTGTAGCAAGGGCGAGGAGGACAACATGGCCATCATCAAGGAGTTCAT  
GCGCTTCAAGGTGCACATGGAGGGCTCCGTGAACGGCCACGAGTTCGAGATCGAGGGCGAGGGCG  
AGGGCCGCCCTACGAGGGCACCCAGACCGCCAAGCTGAAGGTGACCAAGGGCGGCCCTGCC  
CTTGCCTGGGACATCCTGTCCCCTCAGTTCATGTACGGCTCCAAGGCCTACGTGAAGCACCCCGC  
CGACATCCCCGACTACTTGAAGCTGTCTTCCCCGAGGGCTTCAAGTGGGAGCGCGTGTGAACCTT  
CGAGGACGGCGGCGTGGTGAACCTGACCCAGGACTCCTCCCTGCAGGACGGCGAGTTCATCTACA  
AGGTGAAGCTGCGCGGCACCAACTTCCCCTCCGACGGCCCCGTAATGCAGAAGAAGACCATGGGC  
TGGGAGGCCTCCTCCGAGCGGATGTACCCCGAGGACGGCGCCCTGAAGGGCGAGATCAAGCAGAG  
GCTGAAGCTGAAGGACGGCGGCCACTACGACGCCGAGGTCAAGACCACCTACAAGGCCAAGAAGC  
CCGTGCAGCTGCCCGGCGCCTACAACGTCAACATCAAGCTGGACATCACCTCCACAACGAGGACT  
ACACCATCGTGGAACAGTACGAGCGCGCCGAGGGCCGCACTCCACCGGCGGCATGGACGAGCTG  
TACAAGTGATCTAGAGGATCCCGGGTGGCATCCCTGTGACCCCTCCCAGTGCCTCTCCTGGCCCT



GGAAGTTGCCACTCCAGTGCCCACCAGCCTTGTCTAATAAAAATTAAGTTGCATCATTTTTGTCTGACT  
AGGTGTCCTTCTATAATATTATGGGGTGGAGGGGGGTGGTATGGAGCAAGGGGCAAGTTGGGAAGA  
CAACCTGTAGGGCCTGCGGGTCTATTGGGAACCAAGCTGGAGTGCAGTGGCACAATCTTGGCTCA  
CTGCAATCTCCGCCTCCTGGGTTCAAGCGATTCTCCTGCCTCAGCCTCCCGAGTTGTTGGGATTCCA  
GGCATGCATGACCAGGCTCAGCTAATTTTTGTTTTTTGGTAGAGACGGGGTTTCACCATATTGGCCA  
GGCTGGTCTCCAACCTAATCTCAGGTGATCTACCCACCTTGGCCTCCCAAATTGCTGGGATTACA  
GGCGTGAACCACTGCTCCCTTCCCTGTCTTCTGATTTTAAAATAACTATACCAGCAGGAGGACGTC  
CAGACACAGCATAGGCTACCTGCCATGGCCCAACCGGTGGGACATTTGAGTTGCTTGGTACT  
GTCCTCTCATGCGTTGGGTCCACTCAGTAGATGCCTGTTGAATTGGGTACGCGGCCAGCTTCTGTG  
GAATGTGTGCAGTTAGGGTGTGGAAGTCCCAGGCTCCCCAGCAGGCAGAAGTATGCAAAGCAT  
GCATCTCAATTAGTCAGCAACCAGGTGTGGAAGTCCCAGGCTCCCCAGCAGGCAGAAGTATGC  
AAAGCATGCATCTCAATTAGTCAGCAACCATAGTCCCGCCCTAACTCCGCCATCCCGCCCCTAAC  
TCCGCCAGTTCCGCCATTCTCCGCCCATGGCTGACTAATTTTTTTTTATTTATGCAGAGGCCGAG  
GCCGCTCGGCCTCTGAGCTATTCCAGAAGTAGTGAGGAGGCTTTTTGGAGGCCTAGGCTTTTGC  
AAAAAGCTCCTCGAGGAAGTAAAAACCAGAAAGTTAATCCCTATAGTGAGTCGTATTAATTCGTA  
ATCATGGTCATAGCTGTTTCTGTGTGAAATTGTTATCCGCTCACAATTCCACACAACATACGAGCCG  
GAAGCATAAAGTGTAAGCCTGGGGTGCCTAATGAGTGAGCTAACTCACATTAATTGCGTTGCGCTC  
ACTGCCCGCTTCCAGTCGGGAAACCTGTCGTGCCAGCTGCATTAATGAATCGGCCAACGCGCGGG  
GAGAGGCGGTTTGCATATTGGGCGCTTCCGCTTCCCTCGCTCACTGACTCGCTGCGCTCGGTGCT  
TCGGCTGCGGCGAGCGGTATCAGCTCACTCAAAGGCGGTAATACGGTTATCCACAGAATCAGGGGA  
TAACGCAGGAAAGAACATGTGAGCAAAAGGCCAGCAAAAGGCCAGGAACCGTAAAAGGCCGCGTTG  
CTGGCGTTTTTCCATAGGCTCCGCCCCCTGACGAGCATCACAATAATCGACGCTCAAGTCAGAGGT  
GGCGAAACCCGACAGGACTATAAGATACCAGGCGTTTTCCCCCTGGAAGCTCCCTCGTGCCTCTC  
CTGTTCCGACCCTGCCGTTACCGGATACCTGTCCGCTTCTCCCTTCGGGAAGCGTGGCGCTTT  
CTCAATGCTCACGCTGTAGGTATCTCAGTTCGGTGTAGGTCGTTCCGCTCAAGCTGGGCTGTGTGCA  
CGAACCCCGTTTCAGCCCGACCGCTGCGCCTTATCCGGTAACTATCGTCTTGAGTCCAACCCGGT  
AAGACACGACTTATCGCCACTGGCAGCAGCCACTGGTAACAGGATTAGCAGAGCGAGGTATGTAGG  
CGGTGCTACAGAGTTCTTGAAGTGGTGGCCTAACTACGGCTACACTAGAAGGACAGTATTTGGTATC  
TGCGCTCTGCTGAAGCCAGTTACCTTCGGAAAAAGAGTTGGTAGCTCTTGATCCGGCAAACAAACCA  
CCGCTGGTAGCGGTGGTTTTTTTTGTTTGAAGCAGCAGATTACGCGCAGAAAAAAGGATCTCAAGA  
AGATCCTTTGATCTTTTCTACGGGGTCTGACGCTCAGTGGAACGAAAACCTCACGTTAAGGGATTTTG  
GTCATGAGATTATCAAAAAGGATCTTCACCTAGATCCTTTTTAAATTAATAAATGAAGTTTTAAATCAATCT  
AAAGTATATATGAGTAACTTGGTCTGACAGTTACCAATGCTTAATCAGTGAGGCACCTATCTCAGCG  
ATCTGTCTATTTTCGTTTCATCCATAGTTGCCTGACTCCCCGTCGTGTAGATAACTACGATACGGGAGG  
GCTTACCATCTGGCCCCAGTGCTGCAATGATACCGCGAGACCCACGCTCACCGGCTCCAGATTTAT  
CAGCAATAAACCAGCCAGCCGGAAGGGCCGAGCGCAGAAGTGGTCCTGCAACTTTATCCGCCTCCA  
TCCAGTCTATTAATTGTTGCCGGGAAGCTAGAGTAAGTAGTTCGCCAGTTAATAGTTTTCGCAACGTT  
GTTGCCATTGCTACAGGCATCGTGGTGTACGCTCGTCTTTGGTATGGCTTCATTACGCTCCGGTT  
CCCAACGATCAAGGCGAGTTACATGATCCCCATGTTGTGCAAAAAGCGGTTAGCTCCTTCGGTCC  
TCCGATCGTTGTGAGAAGTAAGTTGGCCGAGTGTTATCACTCATGGTTATGGCAGCACTGCATAAT  
TCTCTTACTGTCATGCCATCCGTAAGATGCTTTTTCTGTGACTGGTGAGTACTCAACCAAGTCATTCTG  
AGAATAGTGTATGCGGCGACCGAGTTGCTCTTGCCCGCGTCAATACGGGATAATACCGCGCCACA  
TAGCAGAACTTTAAAAGTGCTCATCATTGGAACCGTTCTTCGGGGCGAAAACCTCTCAAGGATCTTAC  
CGCTGTTGAGATCCAGTTCGATGTAACCCACTCGTGCACCCAACTGATCTTCAGCATCTTTTACTTTC  
ACCAGCGTTTCTGGGTGAGCAAAAACAGGAAGGCAAAATGCCGCAAAAAGGGAATAAGGGCGACA  
CGGAAATGTTGAATACTCATACTCTTCTTTTTCAATATTATTGAAGCATTATCAGGGTTATTGTCTC  
ATGAGCGGATACATATTTGAATGTATTTAGAAAAATAAACAATAGGGGTTCCGCGCACATTTCCCGG  
AAAAGTGCCACCTGACGCGCCCTGTAGCGGCGCATTAAAGCGCGGCGGGTGTGGTGGTTACGCGCA  
GCGTGACCGCTACACTTGCCAGCGCCCTAGCGCCCGCTCCTTTCGCTTCTTCCCTTCTTCTCGC  
CACGTTCCGCGGCTTTCCCGTCAAGCTCTAAATCGGGGCATCCCTTTAGGGTTCCGATTTAGTGCT  
TTACGGCACCTCGACCCCAAAAACCTTGATTAGGGTGTGGTTCACGTAGTGGGCCATCGCCCTGAT  
AGACGGTTTTTTCGCCCTTGTACGTTGGAGTCCACGTTCTTAAATAGTGGACTCTTGTTCAAACTGGA

ACAACACTCAACCCTATCTCGGTCTATTCTTTTGATTTATAAGGGATTTTGCCGATTTCCGGCCTATTGG  
TTAAAAAATGAGCTGATTTAACAAAAATTTAACGCGAATTTTAACAAAATATTAACAAAATATTAACGTT  
TACAATTC

## Supplementary Note 2: Synthetic procedures

EMI1 (1) was purchased from InterBioScreen Ltd., with a purity greater than 95%.

EMI7 (2) was purchased from Life Chemicals Inc., with a purity greater than 99%.

### Synthesis of EMI44 (3):

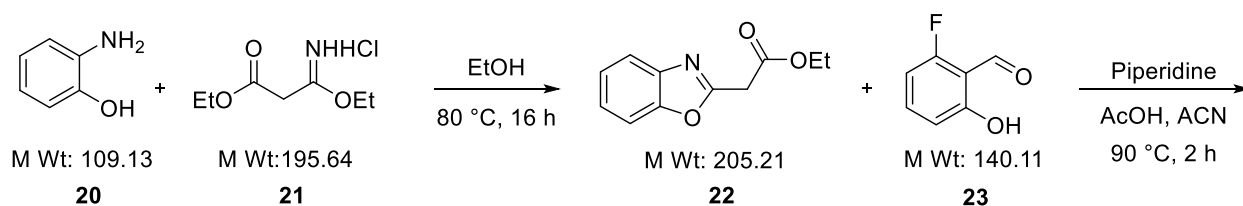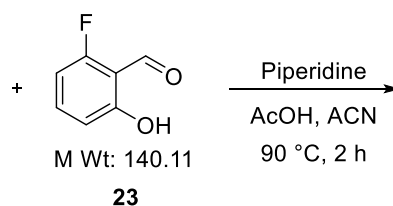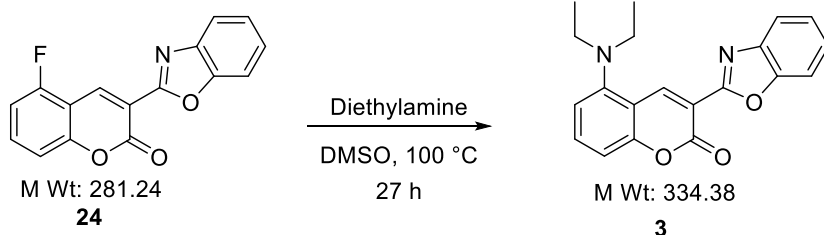

### Synthesis of EMI45 (4):

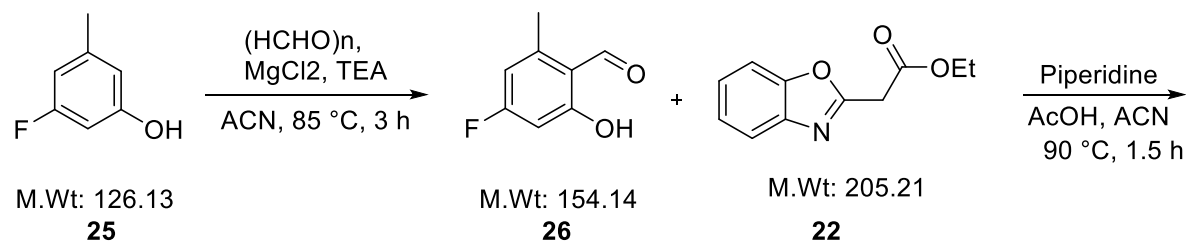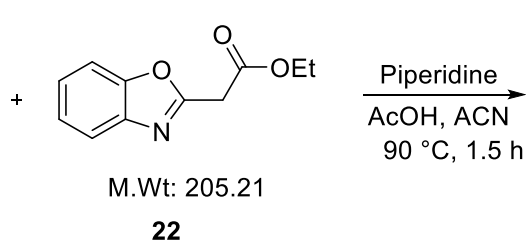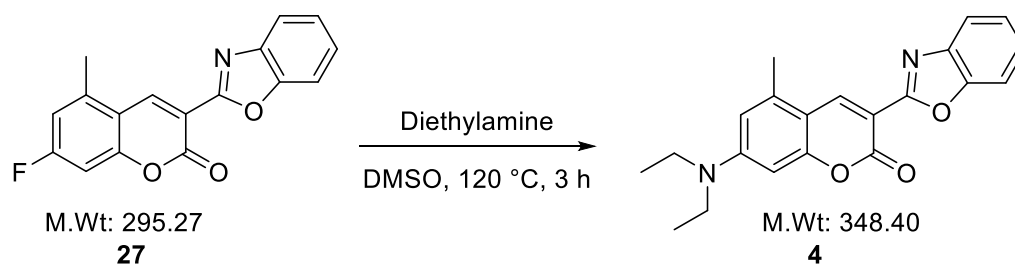

### Synthesis of EMI46 (5):

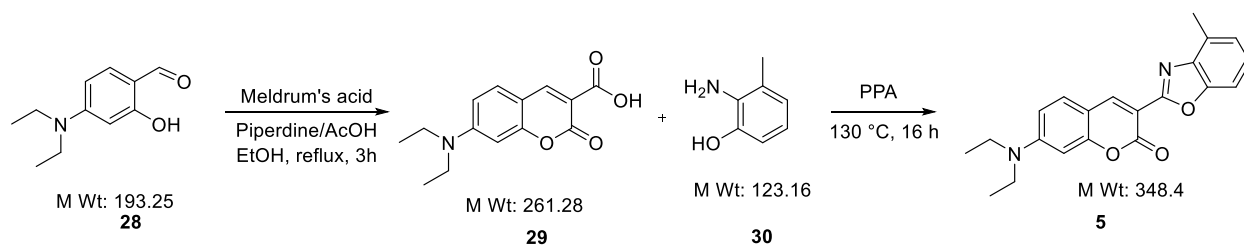

### Synthesis of EMI47 (6):

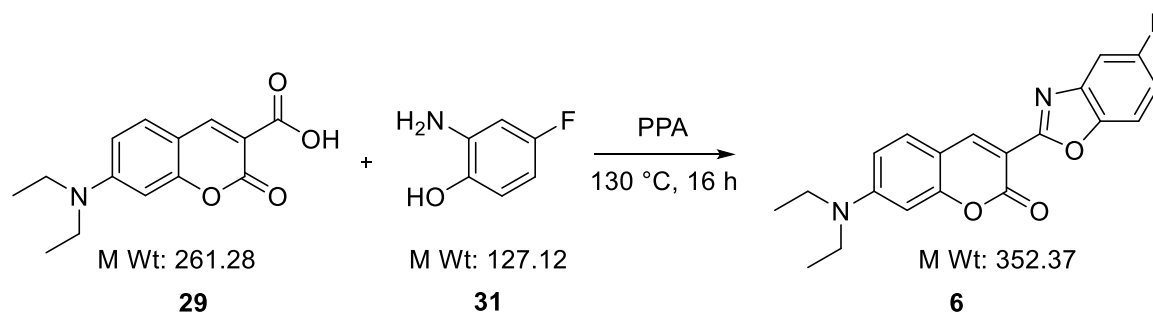

### Synthesis of EMI48 (7):

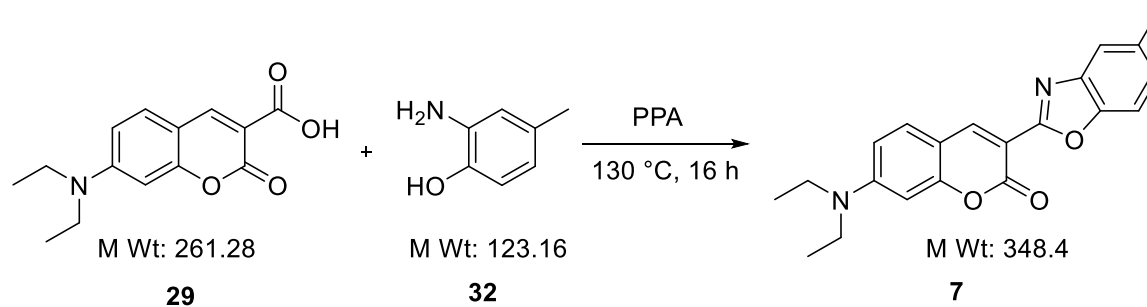

### Synthesis of EMI49 (8):

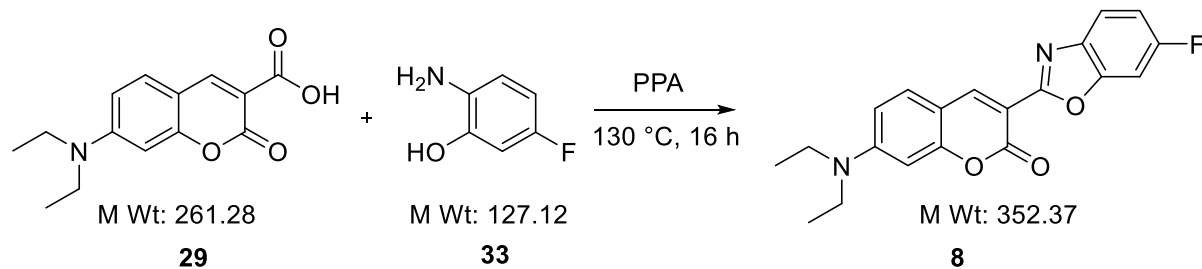

### Synthesis of EMI50 (9):

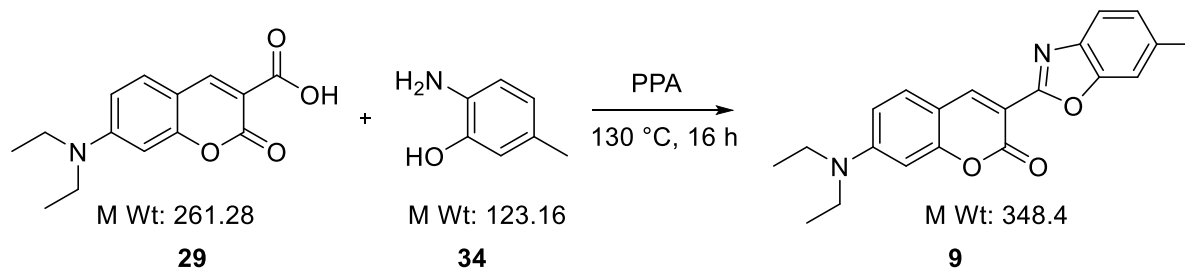

### Synthesis of EMI51 (10):

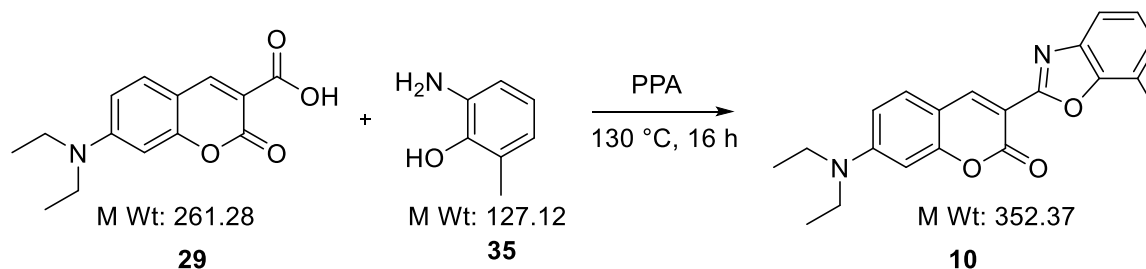

### Synthesis of EMI52 (11):

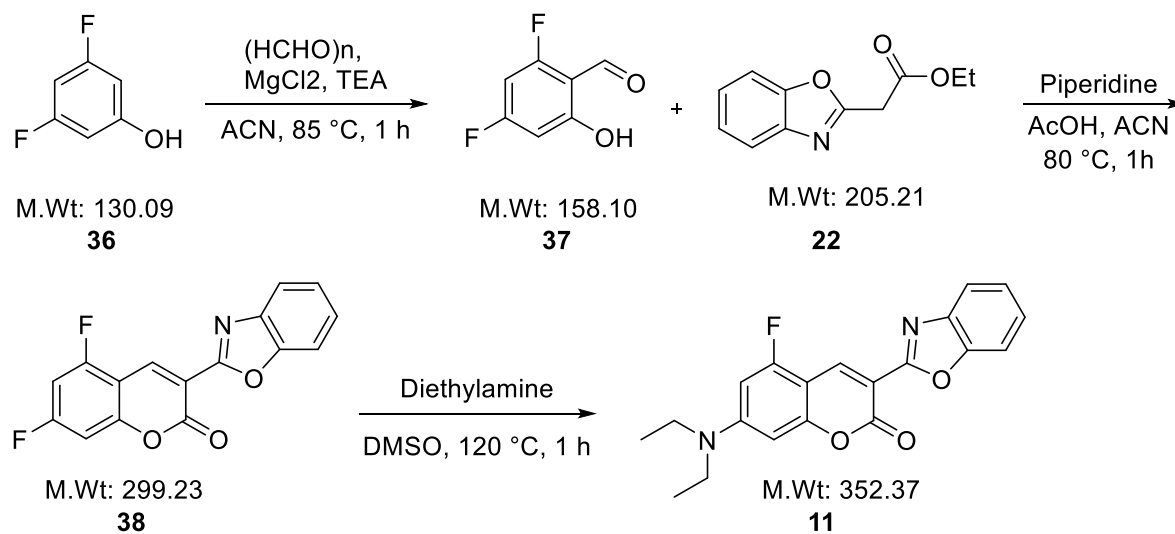

### Synthesis of EMI53 (12):

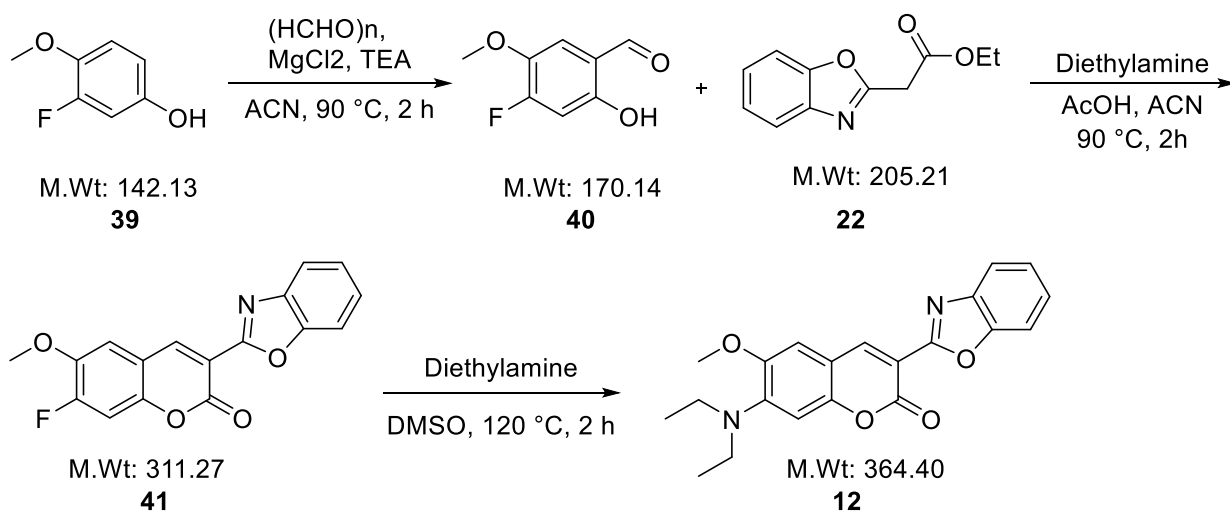

### Synthesis of EMI54 (13):

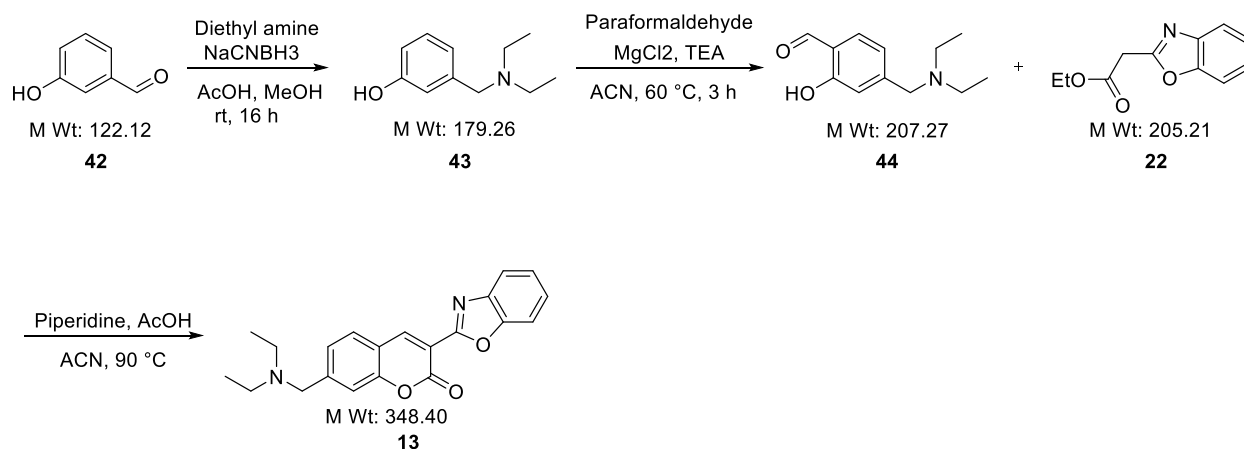

### Synthesis of EMI55 (14):

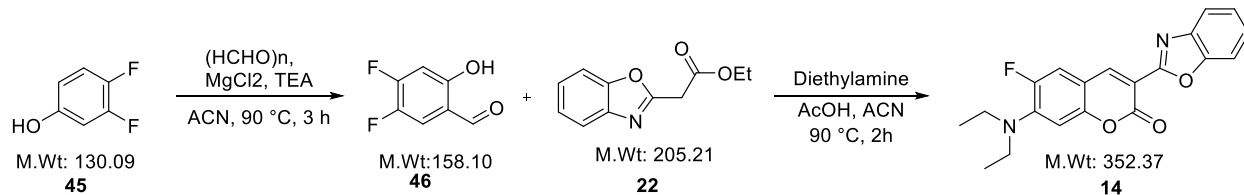

### Synthesis of EMI56 (15):

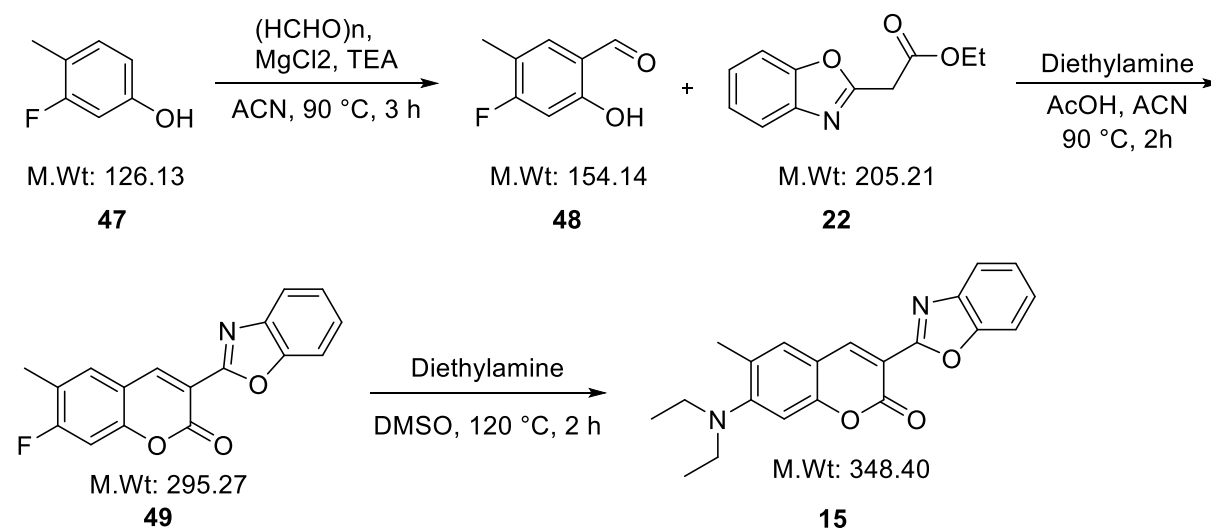

### Synthesis of EMI57 (16):

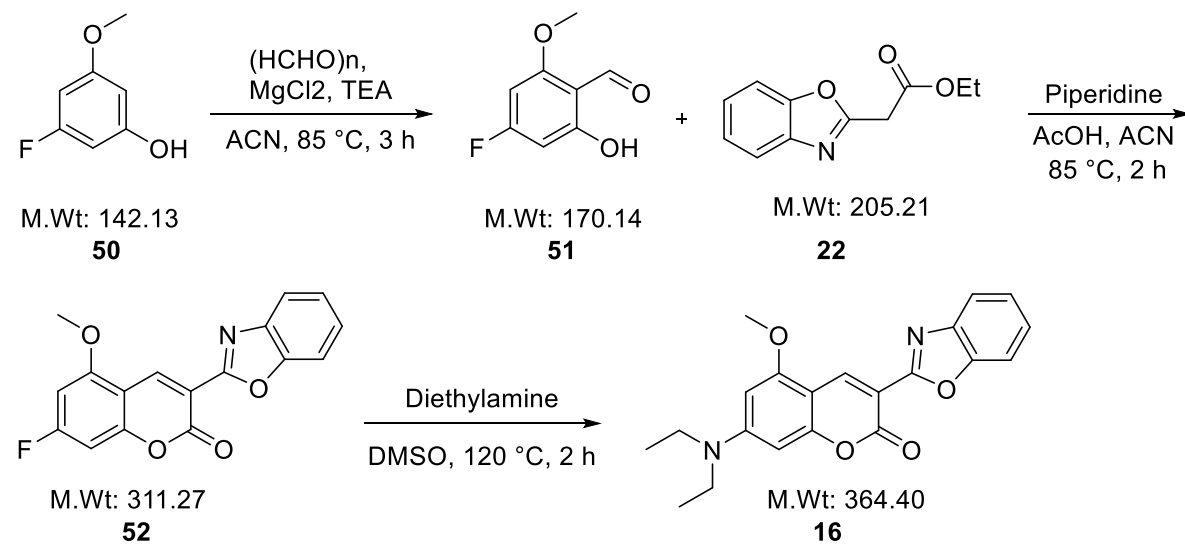

### Synthesis of EMI58 (17):

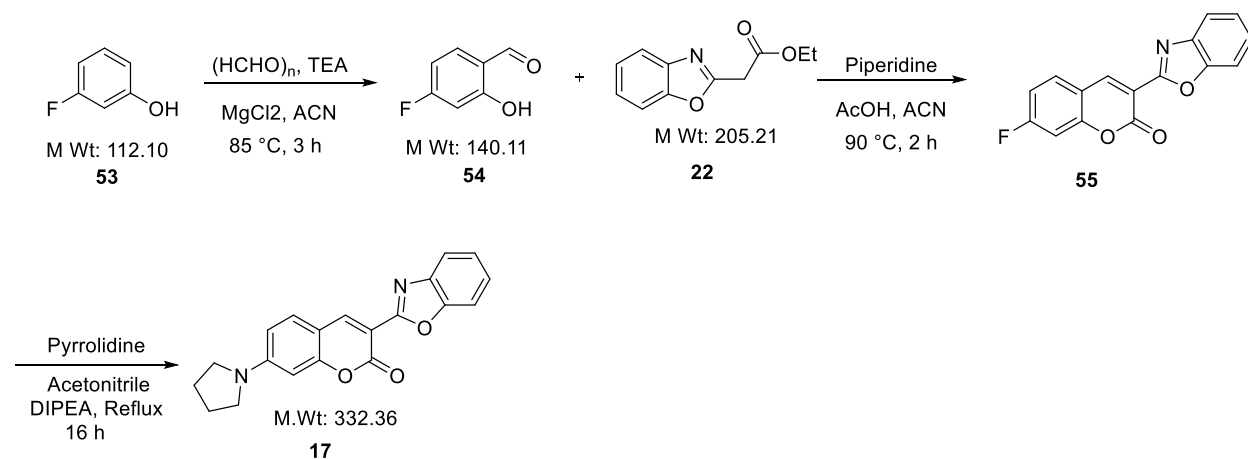

### Synthesis of EMI59 (18):

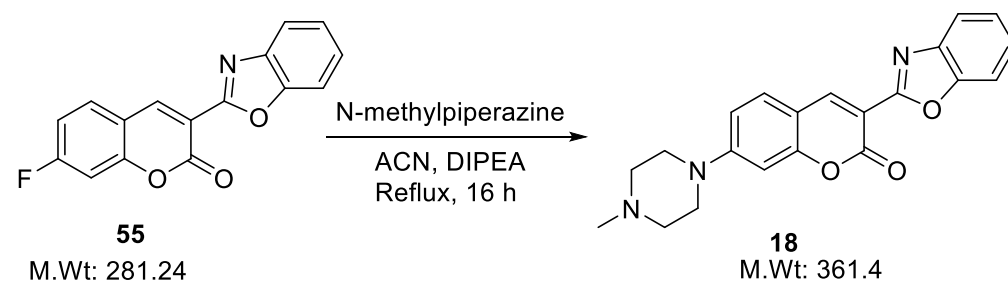

### Synthesis of EMI60 (19):

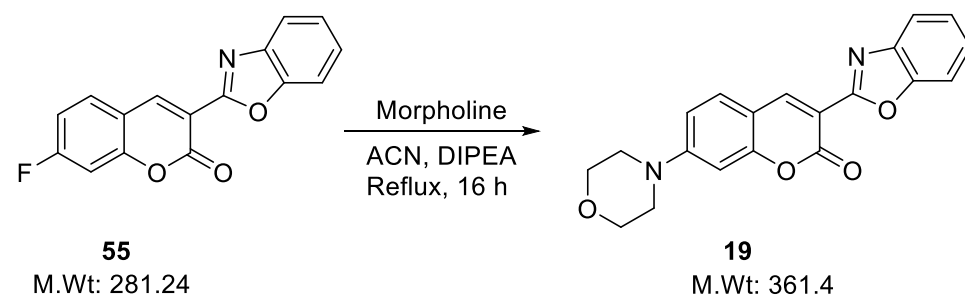



### Preparation of EMI48 (7):

To a stirred solution of **29** (200 mg, 0.766 mmol) polyphosphoric acid (10 g) was added followed by the addition of **32** (189 mg, 1.532 mmol) at room temperature and the resulting reaction mixture was stirred at 130 °C for 16 h. The progress of the reaction was monitored by TLC (5% methanol in chloroform, 0.5  $R_f$ , U.V active) indicating completion of the reaction. The reaction mixture was then cooled to room temperature and poured in ice cold water and extracted with ethyl acetate. The organic layer was washed with cold water twice and saturated with sodium chloride solution. The organic layer was then dried over anhydrous sodium sulfate, filtered and evaporated under reduced pressure to yield 300 mg of crude compound. The crude compound was purified by silica gel column chromatography by eluting with 1% methanol in chloroform afforded 110 mg (41%) of 7-(diethylamino)-3-(5-methylbenzo-[d]oxazol-2-yl)-2H-chromen-2-one (**7**) as a yellow color solid with a purity of 97.8% by HPLC, confirmed by mass and NMR.  $^1\text{H}$  NMR (400 MHz,  $\text{CDCl}_3$ )  $\delta$  8.60 (s, 1H), 7.57 (s, 1H), 7.45 (d,  $J=6.4$  Hz, 1H), 7.41 (d,  $J=7.2$  Hz, 1H), 7.13 (d,  $J=6.4$  Hz, 1H), 6.64 (dd,  $J=7.2$  & 2.0 Hz, 1H), 6.54 (d,  $J=2.0$  Hz, 1H), 3.46 (q,  $J=5.6$  Hz, 4H), 2.47 (s, 3H), 1.24 (t,  $J=5.6$  Hz, 6H).  $^{13}\text{C}$  NMR ( $\text{DMSO}-d_6$ , 126 MHz)  $\delta$  160.0, 157.4, 156.9, 152.4, 148.1, 146.0, 141.6, 134.0, 131.3, 126.0, 119.1, 109.9, 109.9, 107.6, 104.9, 96.1, 44.4, 21.0, 12.3. HRMS ( $m/z$ ):  $[\text{M}+\text{H}]$  calcd for  $\text{C}_{21}\text{H}_{20}\text{N}_2\text{O}_3$ , 348.147; found, 349.1545

### Preparation of EMI56 (15):

**Step 1: Preparation of compound 48:** To a solution of **47** (1 g, 7.930 mmol) in dry acetonitrile (37.5 mL) was added to magnesium chloride (5.59 g, 57.89 mmol), dry TEA (4.2 mL, 29.73 mmol), paraformaldehyde (1.73 g, 57.89 mmol) at room temperature and the resulting reaction mixture was heated to 90 °C, and stirred for 3 h. The progress of the reaction was monitored by TLC (10% ethyl acetate in hexane, 0.6  $R_f$ , U.V and  $\text{KMnO}_4$  active) indicating the completion of the reaction. The reaction mixture was cooled to room temperature, acidified with 5% HCl and extracted with ethyl acetate. The organic layer was then washed with cold water, saturated sodium chloride solution, and dried over anhydrous sodium sulfate, filtered and concentrated under reduced pressure to afford 1 g (82%) of 4-fluoro-2-hydroxy-5-methyl-benzaldehyde (**48**) as a brown color solid. It was used for the next step without further purification.

**Step 2: Preparation of compound 49:** To a solution of **48** (600 mg, 3.894 mmol) in acetonitrile (12 mL) **22** (800 mg, 3.894 mmol) was added followed by the addition of diethyl amine (1.42 g, 19.48 mmol), acetic acid (16 mg, 0.257 mmol) at room temperature. Then the resulting reaction mixture was heated to 90 °C and stirred for 2 h. The progress of the reaction was monitored by TLC (30% ethyl acetate in hexane, 0.5  $R_f$ , U.V active) indicates the completion of the reaction. The reaction mixture was then cooled to 0 °C and the solid was filtered, washed with cold acetonitrile and dried under vacuum

to afford 500 mg of crude 3-(benzo[d]oxazol-2-yl)-7-fluoro-6-methyl-2H-chromen-2-one (**49**) as a yellow color solid, and it was used for next step without further purification.

**Compound EMI56 (15):** To a solution of **49** (600 mg, 2.032 mmol) in dry dimethyl sulfoxide (12 mL) diethyl amine (1.5 g, 20.32 mmol) was added at room temperature. The resulting reaction mixture was stirred at 120 °C for 2 h. The progress of the reaction was monitored by TLC (5% ethyl acetate in chloroform, 0.4  $R_f$ , U.V active) indicating the completion of the reaction. The reaction mixture was then cooled to room temperature and cold water was added, extracted with ethyl acetate. The organic layer was washed with saturated sodium chloride solution, dried over anhydrous sodium sulfate, filtered and concentrated under reduced pressure to afford 500 mg of crude compound and it was purified by column chromatography by eluting with chloroform afforded 100 mg (14%) of 3-(benzo[d]oxazol-2-yl)-7-(diethylamino)-6-methyl-2H-chromen-2-one (**15**) as a yellow color solid.  $^1\text{H}$  NMR (400 MHz,  $\text{CDCl}_3$ )  $\delta$  8.66 (s, 1H), 7.83-7.81 (m, 1H), 7.62-7.60 (m, 1H), 7.37-7.35 (m, 3H), 6.93 (s, 1H), 3.20 (q,  $J=7.6$  Hz, 4H), 2.34 (s, 3H), 1.12 (t,  $J=7.2$  Hz, 6H).  $^{13}\text{C}$  NMR (DMSO- $d_6$ , 126 MHz)  $\delta$  160.0, 157.4, 156.9, 152.4, 148.1, 146.0, 141.6, 134.0, 131.3, 126.0, 119.1, 109.9, 109.9, 107.6, 104.9, 96.1, 44.4, 40.1, 21.0, 12.3. HRMS ( $m/z$ ):  $[\text{M}+\text{H}]$  calcd for  $\text{C}_{21}\text{H}_{20}\text{N}_2\text{O}_3$ , 348.147; found, 349.1548

# HRMS spectrum of EMI48

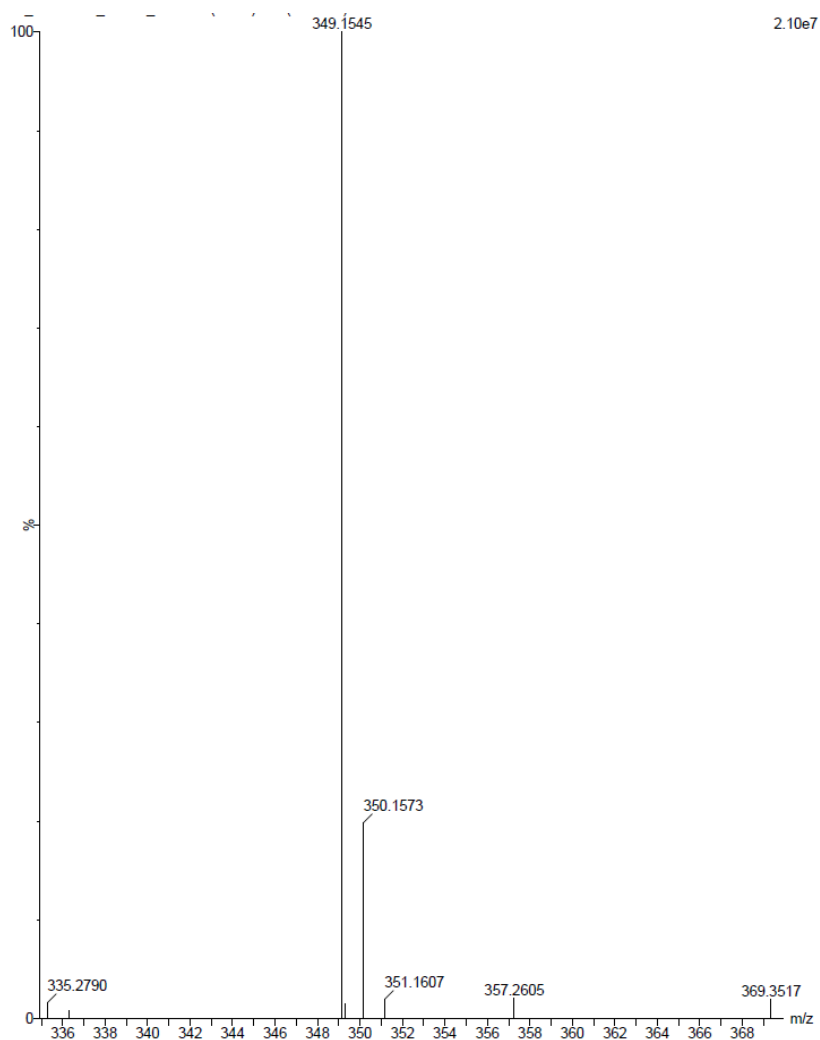

# <sup>1</sup>H NMR spectrum of EMI48

UOT-P-01-C23\_proton-1-2.jdf  
005052

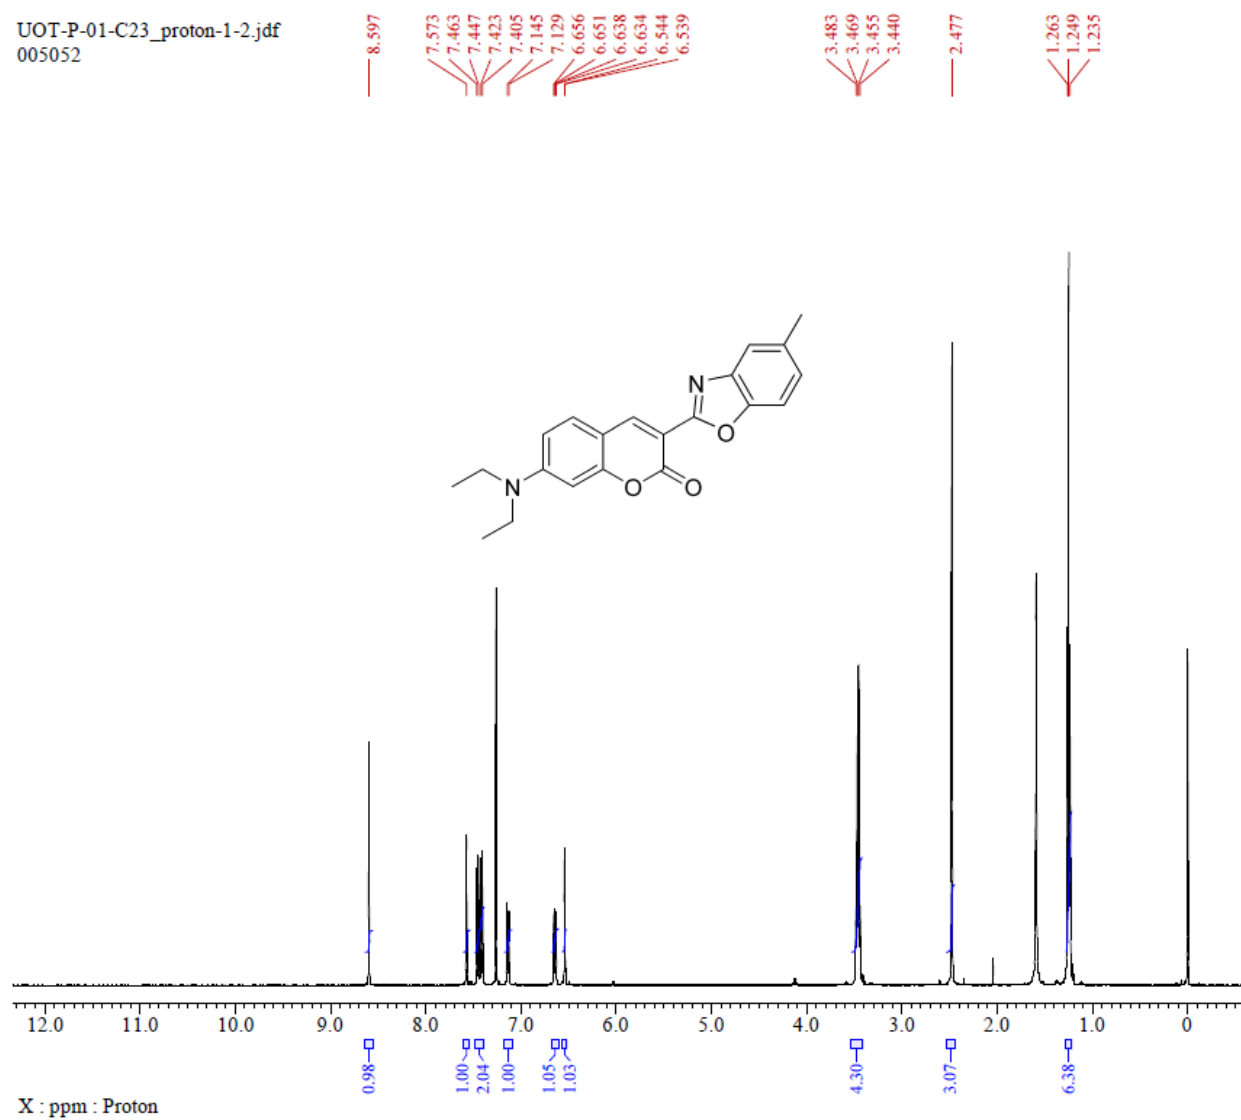

# <sup>13</sup>C NMR spectrum for EMI48

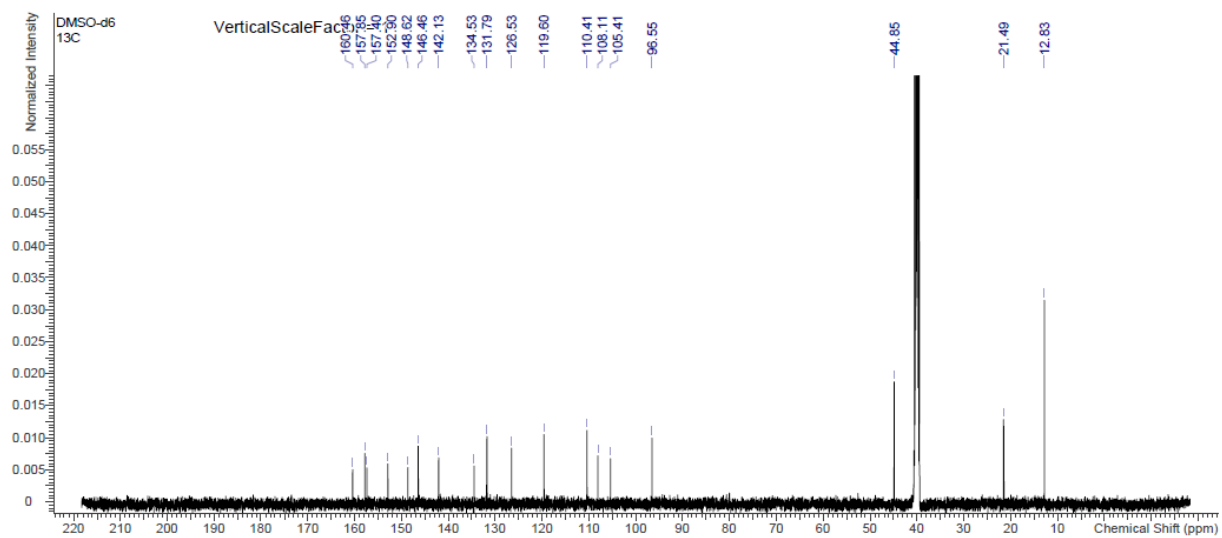

# HRMS spectrum of EMI56

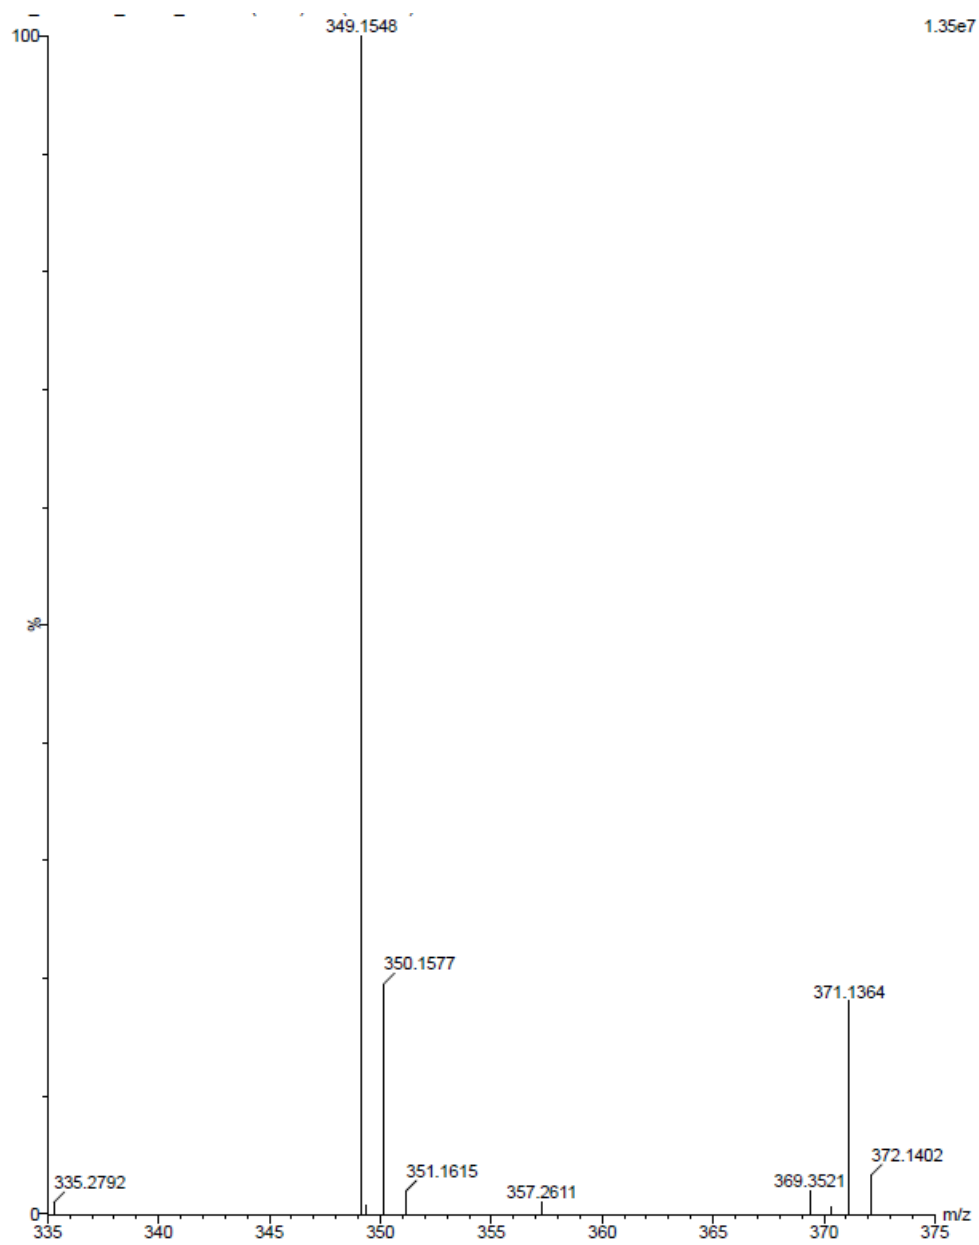

# <sup>1</sup>H NMR spectrum of EMI56

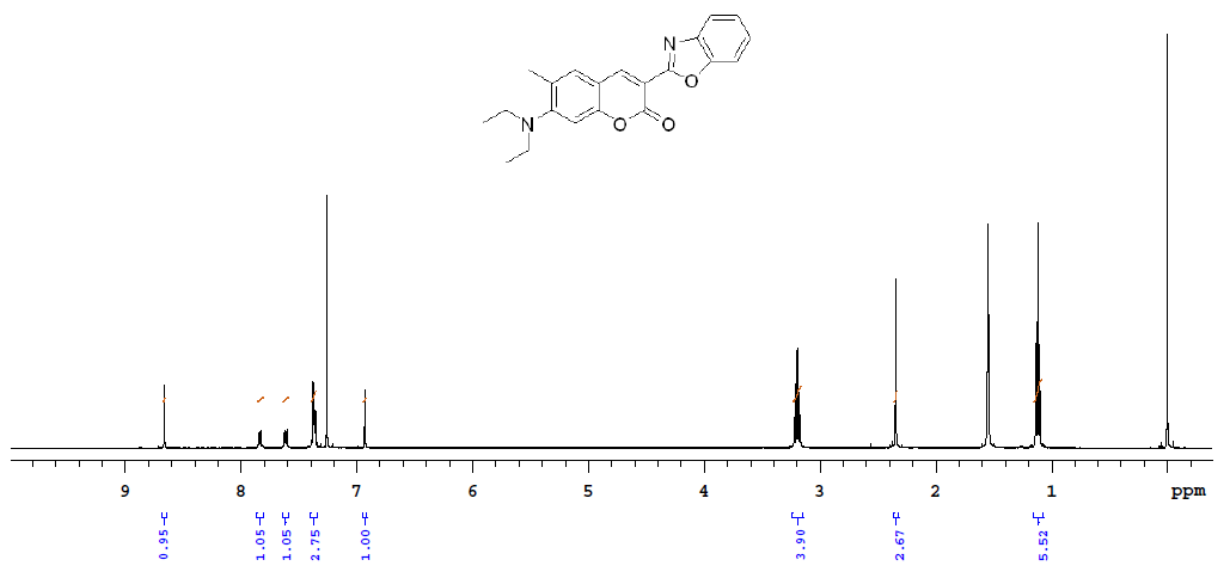

# <sup>13</sup>C NMR spectrum for EMI56

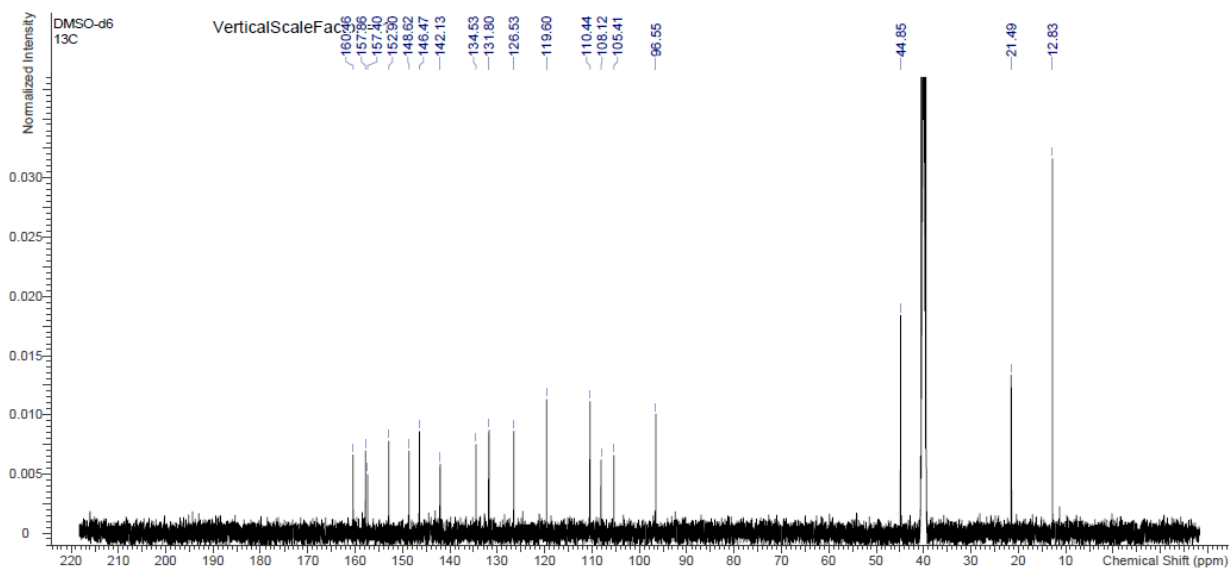

Supplement: NIHMS1698228-supplement-Supplementary_Material.pdf [file NIHMS1698228-supplement-Supplementary_Material.pdf]
